# Supplementary material for: An integrative pan-cancer analysis of molecular characteristics and oncogenic role of mitochondrial creatine kinase 1A (CKMT1A) in human tumors
Source: Sci Rep. 2022 Jun 15;12:10025. doi: 10.1038/s41598-022-14346-z (PMC9200842; doi:10.1038/s41598-022-14346-z)
Supplement: Supplementary file 3 — Supplementary Information 3. [file 41598_2022_14346_MOESM3_ESM.xlsx]

## Sheet: Sheet1
##Databases: KEGG PATHWAY
##Statistical test method: hypergeometric test / Fisher's exact test
##FDR correction method: Benjamini and Hochberg
#Term	Database	ID	Input number	Background number	P-Value	Corrected P-Value	Input	Hyperlink
Metabolic pathways	KEGG PATHWAY	hsa01100	44	1433	2.98524e-28	3.48677e-25	GAMT|NME1-NME2|LDHAL6B|GAPDH|CKMT1B|LDHAL6A|HIBADH|TPI1|VDR|RRM2|FH|HKDC1|PFKM|GATM|PYGB|PFKL|GOT2|PYGL|LDHA|LDHB|LDHC|PLCB3|GAPDHS|ENO4|GGT7|GGT5|CS|ALDOC|ACO2|ETHE1|ALPPL2|NME4|AK9|ALPP|NME2|NME3|AK2|AK1|PYGM|FUT3|FUT2|GGT6|ALPI|CYP2S1	http://www.genome.jp/kegg-bin/show_pathway?hsa01100/hsa:230%09red/hsa:29785%09red/hsa:250%09red/hsa:251%09red/hsa:387712%09red/hsa:3939%09red/hsa:92483%09red/hsa:26330%09red/hsa:2806%09red/hsa:2686%09red/hsa:2687%09red/hsa:5211%09red/hsa:221264%09red/hsa:80201%09red/hsa:11112%09red/hsa:5213%09red/hsa:2271%09red/hsa:7167%09red/hsa:124975%09red/hsa:3948%09red/hsa:5331%09red/hsa:3945%09red/hsa:4833%…
Glycolysis / Gluconeogenesis	KEGG PATHWAY	hsa00010	13	68	3.01822e-18	1.17509e-15	HKDC1|GAPDHS|PFKM|LDHAL6B|GAPDH|LDHAL6A|TPI1|PFKL|ENO4|ALDOC|LDHA|LDHB|LDHC	http://www.genome.jp/kegg-bin/show_pathway?hsa00010/hsa:230%09red/hsa:3945%09red/hsa:160287%09red/hsa:3948%09red/hsa:80201%09red/hsa:5211%09red/hsa:2597%09red/hsa:5213%09red/hsa:387712%09red/hsa:7167%09red/hsa:3939%09red/hsa:92483%09red/hsa:26330%09red
Glucagon signaling pathway	KEGG PATHWAY	hsa04922	11	106	5.65215e-13	1.09386e-10	PLCB3|LDHAL6B|PFKM|LDHA|PYGB|PFKL|LDHAL6A|PYGL|PYGM|LDHB|LDHC	http://www.genome.jp/kegg-bin/show_pathway?hsa04922/hsa:5834%09red/hsa:5331%09red/hsa:5836%09red/hsa:3945%09red/hsa:3948%09red/hsa:5837%09red/hsa:160287%09red/hsa:5211%09red/hsa:5213%09red/hsa:3939%09red/hsa:92483%09red
HIF-1 signaling pathway	KEGG PATHWAY	hsa04066	11	109	7.49221e-13	1.09386e-10	HKDC1|LDHAL6B|GAPDH|LDHAL6A|PFKM|PFKL|ENO4|ALDOC|LDHA|LDHB|LDHC	http://www.genome.jp/kegg-bin/show_pathway?hsa04066/hsa:230%09red/hsa:3945%09red/hsa:160287%09red/hsa:3948%09red/hsa:80201%09red/hsa:5211%09red/hsa:2597%09red/hsa:5213%09red/hsa:387712%09red/hsa:3939%09red/hsa:92483%09red
Carbon metabolism	KEGG PATHWAY	hsa01200	11	117	1.53286e-12	1.98932e-10	CS|HKDC1|GAPDH|GOT2|TPI1|PFKL|ENO4|FH|ALDOC|ACO2|PFKM	http://www.genome.jp/kegg-bin/show_pathway?hsa01200/hsa:1431%09red/hsa:230%09red/hsa:387712%09red/hsa:50%09red/hsa:80201%09red/hsa:2806%09red/hsa:2597%09red/hsa:5213%09red/hsa:2271%09red/hsa:7167%09red/hsa:5211%09red
Biosynthesis of amino acids	KEGG PATHWAY	hsa01230	9	75	2.33035e-11	2.72185e-09	GAPDH|CS|TPI1|PFKL|ENO4|GOT2|ALDOC|ACO2|PFKM	http://www.genome.jp/kegg-bin/show_pathway?hsa01230/hsa:1431%09red/hsa:230%09red/hsa:5211%09red/hsa:50%09red/hsa:2806%09red/hsa:2597%09red/hsa:5213%09red/hsa:387712%09red/hsa:7167%09red
Central carbon metabolism in cancer	KEGG PATHWAY	hsa05230	8	69	3.99074e-10	3.58552e-08	HKDC1|LDHAL6B|LDHAL6A|PFKM|PFKL|LDHA|LDHB|LDHC	http://www.genome.jp/kegg-bin/show_pathway?hsa05230/hsa:3945%09red/hsa:80201%09red/hsa:3948%09red/hsa:160287%09red/hsa:5211%09red/hsa:5213%09red/hsa:3939%09red/hsa:92483%09red
Thiamine metabolism	KEGG PATHWAY	hsa00730	5	16	1.10232e-08	7.57361e-07	AK2|ALPI|ALPP|AK1|ALPPL2	http://www.genome.jp/kegg-bin/show_pathway?hsa00730/hsa:203%09red/hsa:250%09red/hsa:251%09red/hsa:204%09red
Pyruvate metabolism	KEGG PATHWAY	hsa00620	6	39	1.43247e-08	9.29512e-07	LDHAL6B|LDHAL6A|FH|LDHA|LDHB|LDHC	http://www.genome.jp/kegg-bin/show_pathway?hsa00620/hsa:3945%09red/hsa:3948%09red/hsa:160287%09red/hsa:2271%09red/hsa:3939%09red/hsa:92483%09red
Purine metabolism	KEGG PATHWAY	hsa00230	8	130	4.18401e-08	2.44346e-06	NME4|AK9|NME2|NME3|AK2|AK1|RRM2|NME1-NME2	http://www.genome.jp/kegg-bin/show_pathway?hsa00230/hsa:4833%09red/hsa:4832%09red/hsa:4831%09red/hsa:221264%09red/hsa:654364%09red/hsa:6241%09red/hsa:203%09red/hsa:204%09red
Cysteine and methionine metabolism	KEGG PATHWAY	hsa00270	6	49	4.94973e-08	2.75299e-06	LDHAL6B|LDHAL6A|GOT2|LDHA|LDHB|LDHC	http://www.genome.jp/kegg-bin/show_pathway?hsa00270/hsa:2806%09red/hsa:3945%09red/hsa:3948%09red/hsa:160287%09red/hsa:3939%09red/hsa:92483%09red
Pyrimidine metabolism	KEGG PATHWAY	hsa00240	6	57	1.13298e-07	5.51382e-06	NME4|AK9|NME2|NME3|NME1-NME2|RRM2	http://www.genome.jp/kegg-bin/show_pathway?hsa00240/hsa:4833%09red/hsa:4832%09red/hsa:4831%09red/hsa:221264%09red/hsa:654364%09red/hsa:6241%09red
Fructose and mannose metabolism	KEGG PATHWAY	hsa00051	5	33	2.58831e-07	1.20926e-05	HKDC1|ALDOC|PFKL|TPI1|PFKM	http://www.genome.jp/kegg-bin/show_pathway?hsa00051/hsa:5211%09red/hsa:230%09red/hsa:5213%09red/hsa:80201%09red/hsa:7167%09red
Propanoate metabolism	KEGG PATHWAY	hsa00640	5	34	2.96036e-07	1.32988e-05	LDHC|LDHAL6B|LDHA|LDHB|LDHAL6A	http://www.genome.jp/kegg-bin/show_pathway?hsa00640/hsa:3939%09red/hsa:92483%09red/hsa:160287%09red/hsa:3948%09red/hsa:3945%09red
Starch and sucrose metabolism	KEGG PATHWAY	hsa00500	4	36	1.33793e-05	0.000339717	HKDC1|PYGB|PYGL|PYGM	http://www.genome.jp/kegg-bin/show_pathway?hsa00500/hsa:5834%09red/hsa:80201%09red/hsa:5836%09red/hsa:5837%09red
Drug metabolism - other enzymes	KEGG PATHWAY	hsa00983	5	79	1.39358e-05	0.000346319	NME4|NME1-NME2|RRM2|NME2|NME3	http://www.genome.jp/kegg-bin/show_pathway?hsa00983/hsa:4833%09red/hsa:4832%09red/hsa:4831%09red/hsa:654364%09red/hsa:6241%09red
Taurine and hypotaurine metabolism	KEGG PATHWAY	hsa00430	3	11	1.62215e-05	0.000371505	GGT6|GGT7|GGT5	http://www.genome.jp/kegg-bin/show_pathway?hsa00430/hsa:2686%09red/hsa:124975%09red/hsa:2687%09red
Necroptosis	KEGG PATHWAY	hsa04217	6	162	3.48988e-05	0.00072789	SLC25A5|PYGB|PGAM5|CAPN1|PYGL|PYGM	http://www.genome.jp/kegg-bin/show_pathway?hsa04217/hsa:5834%09red/hsa:5836%09red/hsa:5837%09red/hsa:192111%09red/hsa:292%09red/hsa:823%09red
Arginine and proline metabolism	KEGG PATHWAY	hsa00330	4	50	4.45213e-05	0.000881371	GOT2|GATM|GAMT|CKMT1B	http://www.genome.jp/kegg-bin/show_pathway?hsa00330/hsa:2806%09red/hsa:2628%09red/hsa:2593%09red/hsa:1159%09red
2-Oxocarboxylic acid metabolism	KEGG PATHWAY	hsa01210	3	18	5.81838e-05	0.00113094	GOT2|CS|ACO2	http://www.genome.jp/kegg-bin/show_pathway?hsa01210/hsa:1431%09red/hsa:2806%09red/hsa:50%09red
Glutathione metabolism	KEGG PATHWAY	hsa00480	4	56	6.75077e-05	0.00125157	GGT5|GGT6|RRM2|GGT7	http://www.genome.jp/kegg-bin/show_pathway?hsa00480/hsa:2686%09red/hsa:124975%09red/hsa:2687%09red/hsa:6241%09red
Folate biosynthesis	KEGG PATHWAY	hsa00790	3	26	0.00015651	0.00261147	ALPI|ALPP|ALPPL2	http://www.genome.jp/kegg-bin/show_pathway?hsa00790/hsa:250%09red/hsa:251%09red
p53 signaling pathway	KEGG PATHWAY	hsa04115	4	72	0.00016986	0.00279432	PERP|SERPINB5|RRM2|CYCS	http://www.genome.jp/kegg-bin/show_pathway?hsa04115/hsa:54205%09red/hsa:64065%09red/hsa:5268%09red/hsa:6241%09red
Citrate cycle (TCA cycle)	KEGG PATHWAY	hsa00020	3	30	0.00023124	0.00364984	FH|CS|ACO2	http://www.genome.jp/kegg-bin/show_pathway?hsa00020/hsa:1431%09red/hsa:2271%09red/hsa:50%09red
Pentose phosphate pathway	KEGG PATHWAY	hsa00030	3	30	0.00023124	0.00364984	ALDOC|PFKL|PFKM	http://www.genome.jp/kegg-bin/show_pathway?hsa00030/hsa:5211%09red/hsa:230%09red/hsa:5213%09red
Galactose metabolism	KEGG PATHWAY	hsa00052	3	31	0.00025295	0.00386245	HKDC1|PFKM|PFKL	http://www.genome.jp/kegg-bin/show_pathway?hsa00052/hsa:5211%09red/hsa:5213%09red/hsa:80201%09red
Alzheimer disease	KEGG PATHWAY	hsa05010	5	171	0.000460259	0.00604025	CYCS|APP|PLCB3|GAPDH|CAPN1	http://www.genome.jp/kegg-bin/show_pathway?hsa05010/hsa:351%09red/hsa:2597%09red/hsa:823%09red/hsa:5331%09red/hsa:54205%09red
Apoptosis	KEGG PATHWAY	hsa04210	4	136	0.00169899	0.0162657	TUBA1C|TUBA4A|CYCS|CAPN1	http://www.genome.jp/kegg-bin/show_pathway?hsa04210/hsa:54205%09red/hsa:84790%09red/hsa:823%09red/hsa:7277%09red
Insulin signaling pathway	KEGG PATHWAY	hsa04910	4	137	0.00174376	0.0165586	HKDC1|PYGB|PYGL|PYGM	http://www.genome.jp/kegg-bin/show_pathway?hsa04910/hsa:5834%09red/hsa:80201%09red/hsa:5836%09red/hsa:5837%09red
RNA degradation	KEGG PATHWAY	hsa03018	3	79	0.00329996	0.0267663	PFKM|PFKL|ENO4	http://www.genome.jp/kegg-bin/show_pathway?hsa03018/hsa:5211%09red/hsa:5213%09red/hsa:387712%09red
cGMP-PKG signaling pathway	KEGG PATHWAY	hsa04022	4	167	0.00349848	0.0279878	PPIF|PLCB3|ATP1B3|SLC25A5	http://www.genome.jp/kegg-bin/show_pathway?hsa04022/hsa:5331%09red/hsa:10105%09red/hsa:292%09red/hsa:483%09red
Gap junction	KEGG PATHWAY	hsa04540	3	88	0.00442153	0.0335347	TUBA1C|TUBA4A|PLCB3	http://www.genome.jp/kegg-bin/show_pathway?hsa04540/hsa:84790%09red/hsa:7277%09red/hsa:5331%09red
Glycosphingolipid biosynthesis - lacto and neolacto series	KEGG PATHWAY	hsa00601	2	27	0.00491632	0.0363435	FUT3|FUT2	http://www.genome.jp/kegg-bin/show_pathway?hsa00601/hsa:2525%09red/hsa:2524%09red
Huntington disease	KEGG PATHWAY	hsa05016	4	193	0.00576353	0.0403102	PPIF|PLCB3|CYCS|SLC25A5	http://www.genome.jp/kegg-bin/show_pathway?hsa05016/hsa:54205%09red/hsa:10105%09red/hsa:292%09red/hsa:5331%09red
Glyoxylate and dicarboxylate metabolism	KEGG PATHWAY	hsa00630	2	30	0.00596388	0.0407358	CS|ACO2	http://www.genome.jp/kegg-bin/show_pathway?hsa00630/hsa:1431%09red/hsa:50%09red
Insulin resistance	KEGG PATHWAY	hsa04931	3	108	0.00766272	0.0502812	PYGB|PYGL|PYGM	http://www.genome.jp/kegg-bin/show_pathway?hsa04931/hsa:5834%09red/hsa:5836%09red/hsa:5837%09red
Toxoplasmosis	KEGG PATHWAY	hsa05145	3	113	0.0086427	0.0557717	PPIF|CYCS|MAPK13	http://www.genome.jp/kegg-bin/show_pathway?hsa05145/hsa:54205%09red/hsa:10105%09red/hsa:5603%09red
Glycine, serine and threonine metabolism	KEGG PATHWAY	hsa00260	2	40	0.0101122	0.0638436	GATM|GAMT	http://www.genome.jp/kegg-bin/show_pathway?hsa00260/hsa:2628%09red/hsa:2593%09red
Carbohydrate digestion and absorption	KEGG PATHWAY	hsa04973	2	44	0.0120423	0.0752162	HKDC1|ATP1B3	http://www.genome.jp/kegg-bin/show_pathway?hsa04973/hsa:80201%09red/hsa:483%09red
Endocrine and other factor-regulated calcium reabsorption	KEGG PATHWAY	hsa04961	2	50	0.0152129	0.0879636	PLCB3|ATP1B3	http://www.genome.jp/kegg-bin/show_pathway?hsa04961/hsa:5331%09red/hsa:483%09red
Parkinson disease	KEGG PATHWAY	hsa05012	3	142	0.0157387	0.0894287	PPIF|CYCS|SLC25A5	http://www.genome.jp/kegg-bin/show_pathway?hsa05012/hsa:54205%09red/hsa:10105%09red/hsa:292%09red
Amyotrophic lateral sclerosis (ALS)	KEGG PATHWAY	hsa05014	2	51	0.0157725	0.0894287	CYCS|MAPK13	http://www.genome.jp/kegg-bin/show_pathway?hsa05014/hsa:54205%09red/hsa:5603%09red
Adrenergic signaling in cardiomyocytes	KEGG PATHWAY	hsa04261	3	149	0.0178218	0.0950495	PLCB3|ATP1B3|MAPK13	http://www.genome.jp/kegg-bin/show_pathway?hsa04261/hsa:5603%09red/hsa:5331%09red/hsa:483%09red
Pathogenic Escherichia coli infection	KEGG PATHWAY	hsa05130	2	55	0.0180977	0.0960826	TUBA1C|TUBA4A	http://www.genome.jp/kegg-bin/show_pathway?hsa05130/hsa:84790%09red/hsa:7277%09red
Cellular senescence	KEGG PATHWAY	hsa04218	3	160	0.0213909	0.0985873	SLC25A5|CAPN1|MAPK13	http://www.genome.jp/kegg-bin/show_pathway?hsa04218/hsa:823%09red/hsa:292%09red/hsa:5603%09red
Phenylalanine, tyrosine and tryptophan biosynthesis	KEGG PATHWAY	hsa00400	1	5	0.0214394	0.0985873	GOT2	http://www.genome.jp/kegg-bin/show_pathway?hsa00400/hsa:2806%09red
Neomycin, kanamycin and gentamicin biosynthesis	KEGG PATHWAY	hsa00524	1	5	0.0214394	0.0985873	HKDC1	http://www.genome.jp/kegg-bin/show_pathway?hsa00524/hsa:80201%09red
Influenza A	KEGG PATHWAY	hsa05164	3	167	0.023851	0.103048	TMPRSS4|CYCS|SLC25A5	http://www.genome.jp/kegg-bin/show_pathway?hsa05164/hsa:54205%09red/hsa:292%09red/hsa:56649%09red
Tight junction	KEGG PATHWAY	hsa04530	3	170	0.0249503	0.103048	TUBA1C|TUBA4A|MYH14	http://www.genome.jp/kegg-bin/show_pathway?hsa04530/hsa:84790%09red/hsa:79784%09red/hsa:7277%09red
Renal cell carcinoma	KEGG PATHWAY	hsa05211	2	69	0.0272737	0.106291	FH|PAK6	http://www.genome.jp/kegg-bin/show_pathway?hsa05211/hsa:2271%09red/hsa:106821730%09red
Tuberculosis	KEGG PATHWAY	hsa05152	3	179	0.0284099	0.106291	VDR|CYCS|MAPK13	http://www.genome.jp/kegg-bin/show_pathway?hsa05152/hsa:54205%09red/hsa:5603%09red/hsa:1594%09red
Thyroid hormone synthesis	KEGG PATHWAY	hsa04918	2	74	0.0309182	0.110536	PLCB3|ATP1B3	http://www.genome.jp/kegg-bin/show_pathway?hsa04918/hsa:5331%09red/hsa:483%09red
Inositol phosphate metabolism	KEGG PATHWAY	hsa00562	2	74	0.0309182	0.110536	TPI1|PLCB3	http://www.genome.jp/kegg-bin/show_pathway?hsa00562/hsa:5331%09red/hsa:7167%09red
Gastric acid secretion	KEGG PATHWAY	hsa04971	2	75	0.031669	0.110536	PLCB3|ATP1B3	http://www.genome.jp/kegg-bin/show_pathway?hsa04971/hsa:5331%09red/hsa:483%09red
Calcium signaling pathway	KEGG PATHWAY	hsa04020	3	193	0.034271	0.114637	PPIF|PLCB3|SLC25A5	http://www.genome.jp/kegg-bin/show_pathway?hsa04020/hsa:10105%09red/hsa:292%09red/hsa:5331%09red
Sulfur metabolism	KEGG PATHWAY	hsa00920	1	10	0.0389564	0.116371	ETHE1	http://www.genome.jp/kegg-bin/show_pathway?hsa00920/hsa:23474%09red
Insulin secretion	KEGG PATHWAY	hsa04911	2	86	0.0403883	0.120341	PLCB3|ATP1B3	http://www.genome.jp/kegg-bin/show_pathway?hsa04911/hsa:5331%09red/hsa:483%09red
Human immunodeficiency virus 1 infection	KEGG PATHWAY	hsa05170	3	212	0.0431461	0.124739	PAK6|CYCS|MAPK13	http://www.genome.jp/kegg-bin/show_pathway?hsa05170/hsa:54205%09red/hsa:5603%09red/hsa:106821730%09red
Salivary secretion	KEGG PATHWAY	hsa04970	2	90	0.0437586	0.125887	PLCB3|ATP1B3	http://www.genome.jp/kegg-bin/show_pathway?hsa04970/hsa:5331%09red/hsa:483%09red
IL-17 signaling pathway	KEGG PATHWAY	hsa04657	2	93	0.0463527	0.126792	MAPK6|MAPK13	http://www.genome.jp/kegg-bin/show_pathway?hsa04657/hsa:5597%09red/hsa:5603%09red
GnRH signaling pathway	KEGG PATHWAY	hsa04912	2	93	0.0463527	0.126792	PLCB3|MAPK13	http://www.genome.jp/kegg-bin/show_pathway?hsa04912/hsa:5603%09red/hsa:5331%09red
Human cytomegalovirus infection	KEGG PATHWAY	hsa05163	3	225	0.049816	0.127815	PLCB3|CYCS|MAPK13	http://www.genome.jp/kegg-bin/show_pathway?hsa05163/hsa:54205%09red/hsa:5603%09red/hsa:5331%09red
Pancreatic secretion	KEGG PATHWAY	hsa04972	2	98	0.050798	0.127815	PLCB3|ATP1B3	http://www.genome.jp/kegg-bin/show_pathway?hsa04972/hsa:5331%09red/hsa:483%09red
Aldosterone synthesis and secretion	KEGG PATHWAY	hsa04925	2	98	0.050798	0.127815	PLCB3|ATP1B3	http://www.genome.jp/kegg-bin/show_pathway?hsa04925/hsa:5331%09red/hsa:483%09red
Phosphatidylinositol signaling system	KEGG PATHWAY	hsa04070	2	99	0.0517049	0.127815	PPIP5K1|PLCB3	http://www.genome.jp/kegg-bin/show_pathway?hsa04070/hsa:9677%09red/hsa:5331%09red
Inflammatory mediator regulation of TRP channels	KEGG PATHWAY	hsa04750	2	100	0.0526175	0.127815	PLCB3|MAPK13	http://www.genome.jp/kegg-bin/show_pathway?hsa04750/hsa:5603%09red/hsa:5331%09red
AGE-RAGE signaling pathway in diabetic complications	KEGG PATHWAY	hsa04933	2	100	0.0526175	0.127815	PLCB3|MAPK13	http://www.genome.jp/kegg-bin/show_pathway?hsa04933/hsa:5603%09red/hsa:5331%09red
Chagas disease (American trypanosomiasis)	KEGG PATHWAY	hsa05142	2	103	0.0553898	0.130946	PLCB3|MAPK13	http://www.genome.jp/kegg-bin/show_pathway?hsa05142/hsa:5603%09red/hsa:5331%09red
T cell receptor signaling pathway	KEGG PATHWAY	hsa04660	2	103	0.0553898	0.130946	PAK6|MAPK13	http://www.genome.jp/kegg-bin/show_pathway?hsa04660/hsa:5603%09red/hsa:106821730%09red
Glycosphingolipid biosynthesis - globo and isoglobo series	KEGG PATHWAY	hsa00603	1	15	0.056162	0.130946	FUT2	http://www.genome.jp/kegg-bin/show_pathway?hsa00603/hsa:2524%09red
Parathyroid hormone synthesis, secretion and action	KEGG PATHWAY	hsa04928	2	106	0.0582124	0.134372	VDR|PLCB3	http://www.genome.jp/kegg-bin/show_pathway?hsa04928/hsa:5331%09red/hsa:1594%09red
Phenylalanine metabolism	KEGG PATHWAY	hsa00360	1	17	0.0629583	0.137594	GOT2	http://www.genome.jp/kegg-bin/show_pathway?hsa00360/hsa:2806%09red
TNF signaling pathway	KEGG PATHWAY	hsa04668	2	112	0.0640031	0.13921	PGAM5|MAPK13	http://www.genome.jp/kegg-bin/show_pathway?hsa04668/hsa:192111%09red/hsa:5603%09red
Serotonergic synapse	KEGG PATHWAY	hsa04726	2	115	0.0669685	0.141509	APP|PLCB3	http://www.genome.jp/kegg-bin/show_pathway?hsa04726/hsa:351%09red/hsa:5331%09red
Steroid biosynthesis	KEGG PATHWAY	hsa00100	1	19	0.069706	0.142586	VDR	http://www.genome.jp/kegg-bin/show_pathway?hsa00100/hsa:1594%09red
Sphingolipid signaling pathway	KEGG PATHWAY	hsa04071	2	119	0.0709921	0.144458	PLCB3|MAPK13	http://www.genome.jp/kegg-bin/show_pathway?hsa04071/hsa:5603%09red/hsa:5331%09red
Thyroid hormone signaling pathway	KEGG PATHWAY	hsa04919	2	119	0.0709921	0.144458	PLCB3|ATP1B3	http://www.genome.jp/kegg-bin/show_pathway?hsa04919/hsa:5331%09red/hsa:483%09red
AMPK signaling pathway	KEGG PATHWAY	hsa04152	2	120	0.0720101	0.145767	PFKM|PFKL	http://www.genome.jp/kegg-bin/show_pathway?hsa04152/hsa:5211%09red/hsa:5213%09red
Platelet activation	KEGG PATHWAY	hsa04611	2	124	0.0761292	0.148242	PLCB3|MAPK13	http://www.genome.jp/kegg-bin/show_pathway?hsa04611/hsa:5603%09red/hsa:5331%09red
Arginine biosynthesis	KEGG PATHWAY	hsa00220	1	21	0.0764054	0.148242	GOT2	http://www.genome.jp/kegg-bin/show_pathway?hsa00220/hsa:2806%09red
Relaxin signaling pathway	KEGG PATHWAY	hsa04926	2	130	0.082444	0.154969	PLCB3|MAPK13	http://www.genome.jp/kegg-bin/show_pathway?hsa04926/hsa:5603%09red/hsa:5331%09red
Proximal tubule bicarbonate reclamation	KEGG PATHWAY	hsa04964	1	23	0.083057	0.154969	ATP1B3	http://www.genome.jp/kegg-bin/show_pathway?hsa04964/hsa:483%09red
Dopaminergic synapse	KEGG PATHWAY	hsa04728	2	131	0.0835117	0.155321	PLCB3|MAPK13	http://www.genome.jp/kegg-bin/show_pathway?hsa04728/hsa:5603%09red/hsa:5331%09red
Vitamin digestion and absorption	KEGG PATHWAY	hsa04977	1	24	0.0863649	0.157616	CBLC	http://www.genome.jp/kegg-bin/show_pathway?hsa04977/hsa:25974%09red
Retrograde endocannabinoid signaling	KEGG PATHWAY	hsa04723	2	148	0.102279	0.17289	PLCB3|MAPK13	http://www.genome.jp/kegg-bin/show_pathway?hsa04723/hsa:5603%09red/hsa:5331%09red
Phagosome	KEGG PATHWAY	hsa04145	2	152	0.106851	0.177781	TUBA1C|TUBA4A	http://www.genome.jp/kegg-bin/show_pathway?hsa04145/hsa:84790%09red/hsa:7277%09red
Cushing syndrome	KEGG PATHWAY	hsa04934	2	155	0.110316	0.181477	FH|PLCB3	http://www.genome.jp/kegg-bin/show_pathway?hsa04934/hsa:5331%09red/hsa:2271%09red
Apoptosis - multiple species	KEGG PATHWAY	hsa04215	1	33	0.115608	0.187282	CYCS	http://www.genome.jp/kegg-bin/show_pathway?hsa04215/hsa:54205%09red
Hepatitis B	KEGG PATHWAY	hsa05161	2	163	0.119695	0.189951	CYCS|MAPK13	http://www.genome.jp/kegg-bin/show_pathway?hsa05161/hsa:54205%09red/hsa:5603%09red
Alanine, aspartate and glutamate metabolism	KEGG PATHWAY	hsa00250	1	36	0.125147	0.19412	GOT2	http://www.genome.jp/kegg-bin/show_pathway?hsa00250/hsa:2806%09red
Tyrosine metabolism	KEGG PATHWAY	hsa00350	1	36	0.125147	0.19412	GOT2	http://www.genome.jp/kegg-bin/show_pathway?hsa00350/hsa:2806%09red
Aldosterone-regulated sodium reabsorption	KEGG PATHWAY	hsa04960	1	37	0.128305	0.197184	ATP1B3	http://www.genome.jp/kegg-bin/show_pathway?hsa04960/hsa:483%09red
African trypanosomiasis	KEGG PATHWAY	hsa05143	1	37	0.128305	0.197184	PLCB3	http://www.genome.jp/kegg-bin/show_pathway?hsa05143/hsa:5331%09red
NOD-like receptor signaling pathway	KEGG PATHWAY	hsa04621	2	178	0.13778	0.206316	PLCB3|MAPK13	http://www.genome.jp/kegg-bin/show_pathway?hsa04621/hsa:5603%09red/hsa:5331%09red
Fat digestion and absorption	KEGG PATHWAY	hsa04975	1	41	0.14082	0.208729	GOT2	http://www.genome.jp/kegg-bin/show_pathway?hsa04975/hsa:2806%09red
Kaposi sarcoma-associated herpesvirus infection	KEGG PATHWAY	hsa05167	2	186	0.147657	0.215041	CYCS|MAPK13	http://www.genome.jp/kegg-bin/show_pathway?hsa05167/hsa:54205%09red/hsa:5603%09red
Chemokine signaling pathway	KEGG PATHWAY	hsa04062	2	190	0.152649	0.220577	PLCB3|CCL16	http://www.genome.jp/kegg-bin/show_pathway?hsa04062/hsa:6360%09red/hsa:5331%09red
Type II diabetes mellitus	KEGG PATHWAY	hsa04930	1	46	0.156214	0.223327	HKDC1	http://www.genome.jp/kegg-bin/show_pathway?hsa04930/hsa:80201%09red
Notch signaling pathway	KEGG PATHWAY	hsa04330	1	48	0.162295	0.228662	DTX2	http://www.genome.jp/kegg-bin/show_pathway?hsa04330/hsa:113878%09red
Amino sugar and nucleotide sugar metabolism	KEGG PATHWAY	hsa00520	1	48	0.162295	0.228662	HKDC1	http://www.genome.jp/kegg-bin/show_pathway?hsa00520/hsa:80201%09red
Valine, leucine and isoleucine degradation	KEGG PATHWAY	hsa00280	1	48	0.162295	0.228662	HIBADH	http://www.genome.jp/kegg-bin/show_pathway?hsa00280/hsa:11112%09red
Epstein-Barr virus infection	KEGG PATHWAY	hsa05169	2	201	0.166541	0.232958	CYCS|MAPK13	http://www.genome.jp/kegg-bin/show_pathway?hsa05169/hsa:54205%09red/hsa:5603%09red
Mineral absorption	KEGG PATHWAY	hsa04978	1	53	0.177307	0.241933	ATP1B3	http://www.genome.jp/kegg-bin/show_pathway?hsa04978/hsa:483%09red
Rap1 signaling pathway	KEGG PATHWAY	hsa04015	2	210	0.178064	0.242683	PLCB3|MAPK13	http://www.genome.jp/kegg-bin/show_pathway?hsa04015/hsa:5603%09red/hsa:5331%09red
Regulation of actin cytoskeleton	KEGG PATHWAY	hsa04810	2	214	0.183226	0.246	PAK6|MYH14	http://www.genome.jp/kegg-bin/show_pathway?hsa04810/hsa:79784%09red/hsa:106821730%09red
Legionellosis	KEGG PATHWAY	hsa05134	1	55	0.183236	0.246	CYCS	http://www.genome.jp/kegg-bin/show_pathway?hsa05134/hsa:54205%09red
Human T-cell leukemia virus 1 infection	KEGG PATHWAY	hsa05166	2	219	0.189708	0.252944	ETS2|SLC25A5	http://www.genome.jp/kegg-bin/show_pathway?hsa05166/hsa:292%09red/hsa:2114%09red
VEGF signaling pathway	KEGG PATHWAY	hsa04370	1	59	0.194969	0.257606	MAPK13	http://www.genome.jp/kegg-bin/show_pathway?hsa04370/hsa:5603%09red
Viral myocarditis	KEGG PATHWAY	hsa05416	1	60	0.197876	0.258522	CYCS	http://www.genome.jp/kegg-bin/show_pathway?hsa05416/hsa:54205%09red
Long-term depression	KEGG PATHWAY	hsa04730	1	60	0.197876	0.258522	PLCB3	http://www.genome.jp/kegg-bin/show_pathway?hsa04730/hsa:5331%09red
Arachidonic acid metabolism	KEGG PATHWAY	hsa00590	1	63	0.206534	0.266767	GGT5	http://www.genome.jp/kegg-bin/show_pathway?hsa00590/hsa:2687%09red
Ras signaling pathway	KEGG PATHWAY	hsa04014	2	232	0.206699	0.266767	ETS2|PAK6	http://www.genome.jp/kegg-bin/show_pathway?hsa04014/hsa:2114%09red/hsa:106821730%09red
Cortisol synthesis and secretion	KEGG PATHWAY	hsa04927	1	65	0.212254	0.272133	PLCB3	http://www.genome.jp/kegg-bin/show_pathway?hsa04927/hsa:5331%09red
Mitophagy - animal	KEGG PATHWAY	hsa04137	1	65	0.212254	0.272133	PGAM5	http://www.genome.jp/kegg-bin/show_pathway?hsa04137/hsa:192111%09red
Retinol metabolism	KEGG PATHWAY	hsa00830	1	67	0.217934	0.275782	CYP2S1	http://www.genome.jp/kegg-bin/show_pathway?hsa00830/hsa:29785%09red
Long-term potentiation	KEGG PATHWAY	hsa04720	1	67	0.217934	0.275782	PLCB3	http://www.genome.jp/kegg-bin/show_pathway?hsa04720/hsa:5331%09red
Shigellosis	KEGG PATHWAY	hsa05131	1	68	0.220758	0.277851	MAPK13	http://www.genome.jp/kegg-bin/show_pathway?hsa05131/hsa:5603%09red
Fc epsilon RI signaling pathway	KEGG PATHWAY	hsa04664	1	68	0.220758	0.277851	MAPK13	http://www.genome.jp/kegg-bin/show_pathway?hsa04664/hsa:5603%09red
Renin secretion	KEGG PATHWAY	hsa04924	1	69	0.223573	0.280486	PLCB3	http://www.genome.jp/kegg-bin/show_pathway?hsa04924/hsa:5331%09red
Prolactin signaling pathway	KEGG PATHWAY	hsa04917	1	70	0.226377	0.282487	MAPK13	http://www.genome.jp/kegg-bin/show_pathway?hsa04917/hsa:5603%09red
Epithelial cell signaling in Helicobacter pylori infection	KEGG PATHWAY	hsa05120	1	70	0.226377	0.282487	MAPK13	http://www.genome.jp/kegg-bin/show_pathway?hsa05120/hsa:5603%09red
RIG-I-like receptor signaling pathway	KEGG PATHWAY	hsa04622	1	70	0.226377	0.282487	MAPK13	http://www.genome.jp/kegg-bin/show_pathway?hsa04622/hsa:5603%09red
Adherens junction	KEGG PATHWAY	hsa04520	1	72	0.231955	0.286086	PVRL1	http://www.genome.jp/kegg-bin/show_pathway?hsa04520/hsa:5818%09red
Bile secretion	KEGG PATHWAY	hsa04976	1	72	0.231955	0.286086	ATP1B3	http://www.genome.jp/kegg-bin/show_pathway?hsa04976/hsa:483%09red
Platinum drug resistance	KEGG PATHWAY	hsa01524	1	73	0.234729	0.287076	CYCS	http://www.genome.jp/kegg-bin/show_pathway?hsa01524/hsa:54205%09red
Leishmaniasis	KEGG PATHWAY	hsa05140	1	74	0.237494	0.288951	MAPK13	http://www.genome.jp/kegg-bin/show_pathway?hsa05140/hsa:5603%09red
Pertussis	KEGG PATHWAY	hsa05133	1	76	0.242993	0.292292	MAPK13	http://www.genome.jp/kegg-bin/show_pathway?hsa05133/hsa:5603%09red
Metabolism of xenobiotics by cytochrome P450	KEGG PATHWAY	hsa00980	1	76	0.242993	0.292292	CYP2S1	http://www.genome.jp/kegg-bin/show_pathway?hsa00980/hsa:29785%09red
Salmonella infection	KEGG PATHWAY	hsa05132	1	83	0.26193	0.309337	MAPK13	http://www.genome.jp/kegg-bin/show_pathway?hsa05132/hsa:5603%09red
Herpes simplex virus 1 infection	KEGG PATHWAY	hsa05168	3	492	0.26479	0.311769	PVRL1|CYCS|ZNF57	http://www.genome.jp/kegg-bin/show_pathway?hsa05168/hsa:54205%09red/hsa:5818%09red/hsa:126295%09red
ErbB signaling pathway	KEGG PATHWAY	hsa04012	1	85	0.267254	0.313406	PAK6	http://www.genome.jp/kegg-bin/show_pathway?hsa04012/hsa:106821730%09red
Cardiac muscle contraction	KEGG PATHWAY	hsa04260	1	86	0.269901	0.315245	ATP1B3	http://www.genome.jp/kegg-bin/show_pathway?hsa04260/hsa:483%09red
Colorectal cancer	KEGG PATHWAY	hsa05210	1	86	0.269901	0.315245	CYCS	http://www.genome.jp/kegg-bin/show_pathway?hsa05210/hsa:54205%09red
PD-L1 expression and PD-1 checkpoint pathway in cancer	KEGG PATHWAY	hsa05235	1	89	0.277787	0.3222	MAPK13	http://www.genome.jp/kegg-bin/show_pathway?hsa05235/hsa:5603%09red
Protein digestion and absorption	KEGG PATHWAY	hsa04974	1	90	0.280397	0.324583	ATP1B3	http://www.genome.jp/kegg-bin/show_pathway?hsa04974/hsa:483%09red
Th1 and Th2 cell differentiation	KEGG PATHWAY	hsa04658	1	92	0.285589	0.328694	MAPK13	http://www.genome.jp/kegg-bin/show_pathway?hsa04658/hsa:5603%09red
Small cell lung cancer	KEGG PATHWAY	hsa05222	1	93	0.28817	0.328694	CYCS	http://www.genome.jp/kegg-bin/show_pathway?hsa05222/hsa:54205%09red
Amoebiasis	KEGG PATHWAY	hsa05146	1	95	0.293306	0.332604	PLCB3	http://www.genome.jp/kegg-bin/show_pathway?hsa05146/hsa:5331%09red
MicroRNAs in cancer	KEGG PATHWAY	hsa05206	2	299	0.295721	0.335016	ST14|SERPINB5	http://www.genome.jp/kegg-bin/show_pathway?hsa05206/hsa:6768%09red/hsa:5268%09red
Circadian entrainment	KEGG PATHWAY	hsa04713	1	97	0.298405	0.337403	PLCB3	http://www.genome.jp/kegg-bin/show_pathway?hsa04713/hsa:5331%09red
Endocrine resistance	KEGG PATHWAY	hsa01522	1	98	0.300941	0.339285	MAPK13	http://www.genome.jp/kegg-bin/show_pathway?hsa01522/hsa:5603%09red
Pathways in cancer	KEGG PATHWAY	hsa05200	3	530	0.301932	0.340074	FH|PLCB3|CYCS	http://www.genome.jp/kegg-bin/show_pathway?hsa05200/hsa:54205%09red/hsa:5331%09red/hsa:2271%09red
Progesterone-mediated oocyte maturation	KEGG PATHWAY	hsa04914	1	99	0.303468	0.341069	MAPK13	http://www.genome.jp/kegg-bin/show_pathway?hsa04914/hsa:5603%09red
Viral protein interaction with cytokine and cytokine receptor	KEGG PATHWAY	hsa04061	1	100	0.305985	0.342986	CCL16	http://www.genome.jp/kegg-bin/show_pathway?hsa04061/hsa:6360%09red
Melanogenesis	KEGG PATHWAY	hsa04916	1	101	0.308494	0.344805	PLCB3	http://www.genome.jp/kegg-bin/show_pathway?hsa04916/hsa:5331%09red
C-type lectin receptor signaling pathway	KEGG PATHWAY	hsa04625	1	104	0.315966	0.352145	MAPK13	http://www.genome.jp/kegg-bin/show_pathway?hsa04625/hsa:5603%09red
Toll-like receptor signaling pathway	KEGG PATHWAY	hsa04620	1	104	0.315966	0.352145	MAPK13	http://www.genome.jp/kegg-bin/show_pathway?hsa04620/hsa:5603%09red
Th17 cell differentiation	KEGG PATHWAY	hsa04659	1	107	0.323358	0.359355	MAPK13	http://www.genome.jp/kegg-bin/show_pathway?hsa04659/hsa:5603%09red
Cholinergic synapse	KEGG PATHWAY	hsa04725	1	112	0.335501	0.371085	PLCB3	http://www.genome.jp/kegg-bin/show_pathway?hsa04725/hsa:5331%09red
Leukocyte transendothelial migration	KEGG PATHWAY	hsa04670	1	112	0.335501	0.371085	MAPK13	http://www.genome.jp/kegg-bin/show_pathway?hsa04670/hsa:5603%09red
Glutamatergic synapse	KEGG PATHWAY	hsa04724	1	114	0.340298	0.375324	PLCB3	http://www.genome.jp/kegg-bin/show_pathway?hsa04724/hsa:5331%09red
Neurotrophin signaling pathway	KEGG PATHWAY	hsa04722	1	119	0.35214	0.385112	MAPK13	http://www.genome.jp/kegg-bin/show_pathway?hsa04722/hsa:5603%09red
Yersinia infection	KEGG PATHWAY	hsa05135	1	121	0.356817	0.389497	MAPK13	http://www.genome.jp/kegg-bin/show_pathway?hsa05135/hsa:5603%09red
Osteoclast differentiation	KEGG PATHWAY	hsa04380	1	128	0.372925	0.401453	MAPK13	http://www.genome.jp/kegg-bin/show_pathway?hsa04380/hsa:5603%09red
Oocyte meiosis	KEGG PATHWAY	hsa04114	1	128	0.372925	0.401453	MAPK13	http://www.genome.jp/kegg-bin/show_pathway?hsa04114/hsa:5603%09red
Vascular smooth muscle contraction	KEGG PATHWAY	hsa04270	1	132	0.38195	0.409282	PLCB3	http://www.genome.jp/kegg-bin/show_pathway?hsa04270/hsa:5331%09red
FoxO signaling pathway	KEGG PATHWAY	hsa04068	1	132	0.38195	0.409282	MAPK13	http://www.genome.jp/kegg-bin/show_pathway?hsa04068/hsa:5603%09red
Apelin signaling pathway	KEGG PATHWAY	hsa04371	1	137	0.393049	0.419635	PLCB3	http://www.genome.jp/kegg-bin/show_pathway?hsa04371/hsa:5331%09red
Measles	KEGG PATHWAY	hsa05162	1	138	0.395245	0.42121	CYCS	http://www.genome.jp/kegg-bin/show_pathway?hsa05162/hsa:54205%09red
Estrogen signaling pathway	KEGG PATHWAY	hsa04915	1	138	0.395245	0.42121	PLCB3	http://www.genome.jp/kegg-bin/show_pathway?hsa04915/hsa:5331%09red
Fluid shear stress and atherosclerosis	KEGG PATHWAY	hsa05418	1	139	0.397433	0.423155	MAPK13	http://www.genome.jp/kegg-bin/show_pathway?hsa05418/hsa:5603%09red
Signaling pathways regulating pluripotency of stem cells	KEGG PATHWAY	hsa04550	1	140	0.399613	0.424702	MAPK13	http://www.genome.jp/kegg-bin/show_pathway?hsa04550/hsa:5603%09red
Cell adhesion molecules (CAMs)	KEGG PATHWAY	hsa04514	1	146	0.412531	0.436841	PVRL1	http://www.genome.jp/kegg-bin/show_pathway?hsa04514/hsa:5818%09red
Phospholipase D signaling pathway	KEGG PATHWAY	hsa04072	1	148	0.416775	0.440936	PLCB3	http://www.genome.jp/kegg-bin/show_pathway?hsa04072/hsa:5331%09red
Non-alcoholic fatty liver disease (NAFLD)	KEGG PATHWAY	hsa04932	1	149	0.418886	0.442768	CYCS	http://www.genome.jp/kegg-bin/show_pathway?hsa04932/hsa:54205%09red
Oxytocin signaling pathway	KEGG PATHWAY	hsa04921	1	153	0.427253	0.449983	PLCB3	http://www.genome.jp/kegg-bin/show_pathway?hsa04921/hsa:5331%09red
Hepatitis C	KEGG PATHWAY	hsa05160	1	155	0.431392	0.453933	CYCS	http://www.genome.jp/kegg-bin/show_pathway?hsa05160/hsa:54205%09red
Wnt signaling pathway	KEGG PATHWAY	hsa04310	1	160	0.441609	0.461359	PLCB3	http://www.genome.jp/kegg-bin/show_pathway?hsa04310/hsa:5331%09red
Protein processing in endoplasmic reticulum	KEGG PATHWAY	hsa04141	1	165	0.451644	0.47016	CAPN1	http://www.genome.jp/kegg-bin/show_pathway?hsa04141/hsa:823%09red
Axon guidance	KEGG PATHWAY	hsa04360	1	181	0.482567	0.498795	PAK6	http://www.genome.jp/kegg-bin/show_pathway?hsa04360/hsa:106821730%09red
Transcriptional misregulation in cancer	KEGG PATHWAY	hsa05202	1	186	0.491871	0.507514	KLF3	http://www.genome.jp/kegg-bin/show_pathway?hsa05202/hsa:51274%09red
Focal adhesion	KEGG PATHWAY	hsa04510	1	199	0.515291	0.528875	PAK6	http://www.genome.jp/kegg-bin/show_pathway?hsa04510/hsa:106821730%09red
Proteoglycans in cancer	KEGG PATHWAY	hsa05205	1	203	0.522279	0.534638	MAPK13	http://www.genome.jp/kegg-bin/show_pathway?hsa05205/hsa:5603%09red
cAMP signaling pathway	KEGG PATHWAY	hsa04024	1	214	0.540984	0.553301	ATP1B3	http://www.genome.jp/kegg-bin/show_pathway?hsa04024/hsa:483%09red
Thermogenesis	KEGG PATHWAY	hsa04714	1	231	0.568472	0.57888	MAPK13	http://www.genome.jp/kegg-bin/show_pathway?hsa04714/hsa:5603%09red
Cytokine-cytokine receptor interaction	KEGG PATHWAY	hsa04060	1	294	0.656821	0.662493	CCL16	http://www.genome.jp/kegg-bin/show_pathway?hsa04060/hsa:6360%09red
MAPK signaling pathway	KEGG PATHWAY	hsa04010	1	295	0.658067	0.663177	MAPK13	http://www.genome.jp/kegg-bin/show_pathway?hsa04010/hsa:5603%09red
--------------------
Additional file 3. The results of KEGG pathway enrichment analysis with combined dataset of the top 100 CKMT1A-correlated genes and 50 potential interacting proteins.
