# Supplementary material for: An integrative pan-cancer analysis of molecular characteristics and oncogenic role of mitochondrial creatine kinase 1A (CKMT1A) in human tumors
Source: Sci Rep. 2022 Jun 15;12:10025. doi: 10.1038/s41598-022-14346-z (PMC9200842; doi:10.1038/s41598-022-14346-z)
Supplement: Supplementary file 4 — Supplementary Information 4. [file 41598_2022_14346_MOESM4_ESM.xlsx]

## Sheet: Sheet1
##Databases: Gene Ontology
##Statistical test method: hypergeometric test / Fisher's exact test
##FDR correction method: Benjamini and Hochberg
--------------------
#Term	Database	ID	Input number	Background number	P-Value	Corrected P-Value	Input	Hyperlink
protein binding	Gene Ontology	GO:0005515	95	11779	1.74052e-19	1.01646e-16	TPI1|PKP3|PKP1|HIBADH|S100A16|ASB9|SMAGP|ARHGEF5|PFKM|PYGB|PERP|CAPN1|TMEM54|GOT1|PYGL|PYGM|CBLC|TRIM29|ATP1B3|SLC25A5|SERPINB5|NME4|MRRF|NME2|NME3|APP|MST1R|ATP8B1|VDR|ZNF57|HR|GAPDH|CYP2S1|GSKIP|TUBA1C|PVRL1|STK24|PLCB3|RHOV|EPS8L3|ETHE1|MISP|IRF6|TRIM7|GAMT|PGAM5|MAPK13|FH|DTX2|ADAP1|NDFIP2|MAPK6|REEP4|CDCP1|SH3RF2|UCHL3|CCL16|NRARP|PPIF|RRM2|MKI67|C1orf106|PTK6|CEP55|LDHAL6B|CYCS|SH2D3A|OVOL1…	http://amigo.geneontology.org/amigo/term/GO:0005515
glycolytic process	Gene Ontology	GO:0006096	9	33	3.20738e-14	9.36554e-12	HKDC1|GAPDH|GAPDHS|TPI1|PFKL|ENO4|ALDOC|LDHA|PFKM	http://amigo.geneontology.org/amigo/term/GO:0006096
cytoplasm	Gene Ontology	GO:0005737	51	4624	9.26059e-14	2.16327e-11	PLS1|GAMT|APP|C1orf106|PTK6|CEP55|GAPDH|MYO1A|LDHAL6A|CYP2S1|GSKIP|PKP3|PKP1|MAPK13|FH|FAM83B|PITX1|S100A16|ADAP1|DTX2|ECT2|TUBA1C|SDCBP2|ARHGEF5|ZC3H12A|NDFIP2|PYGB|STK24|MAPK6|UCHL3|CAPN1|PYGL|PYGM|LDHB|CBLC|VDR|TUBA4A|EPS8L3|SERPINB5|ETHE1|AK9|PLEKHG6|IRF6|NME2|RAB28|AK2|AK1|FAM83H|PPIF|GJB3|TRIM7	http://amigo.geneontology.org/amigo/term/GO:0005737
extracellular exosome	Gene Ontology	GO:0070062	33	2085	6.97335e-13	1.09386e-10	GAPDH|LDHAL6A|TPI1|FH|S100A16|SDCBP2|GATM|PYGB|PFKL|LAD1|CAPN1|GOT2|DSG3|PYGL|LDHA|LDHB|LDHC|PLS1|ATP1B3|GGT6|STK24|CS|TUBA4A|ALDOC|IRF6|RAB25|NME2|AK2|AK1|PYGM|FUT3|FUT2|APP	http://amigo.geneontology.org/amigo/term/GO:0070062
nucleobase-containing small molecule interconversion	Gene Ontology	GO:0015949	7	26	2.69372e-11	2.86024e-09	NME4|AK9|NME2|NME3|AK2|AK1|RRM2	http://amigo.geneontology.org/amigo/term/GO:0015949
L-lactate dehydrogenase activity	Gene Ontology	GO:0004459	5	5	1.40938e-10	1.37179e-08	LDHC|LDHAL6B|LDHA|LDHB|LDHAL6A	http://amigo.geneontology.org/amigo/term/GO:0004459
mitochondrion	Gene Ontology	GO:0005739	22	1258	1.33486e-09	1.11366e-07	VDR|BRI3BP|CYCS|HIBADH|PGAM5|FH|NDFIP2|HKDC1|ASB9|GATM|PERP|CAPN1|GOT2|SLC25A5|CS|ACO2|ETHE1|NME4|AK9|MRRF|AK2|PPIF	http://amigo.geneontology.org/amigo/term/GO:0005739
cytosol	Gene Ontology	GO:0005829	46	5095	2.01826e-09	1.47337e-07	GAMT|PTK6|GAPDH|CYCS|TPI1|VDR|RRM2|MAPK13|FH|FAM83G|S100A16|ARHGEF5|ECT2|HKDC1|ASB9|ADAP1|PFKM|PFKL|MAPK6|CAPN1|DSG3|PYGL|LDHA|LDHB|LDHC|CBLC|PLCB3|RASEF|GAPDHS|RHOV|FERMT1|STK24|TUBA4A|ALDOC|ACO2|UCHL3|AK9|IRF6|NME2|NME3|AK1|PYGM|ATP8B1|PPIP5K1|ETS2|APP	http://amigo.geneontology.org/amigo/term/GO:0005829
canonical glycolysis	Gene Ontology	GO:0061621	6	27	2.01832e-09	1.47337e-07	TPI1|GAPDH|GAPDHS|PFKM|PFKL|ALDOC	http://amigo.geneontology.org/amigo/term/GO:0061621
nucleoside diphosphate kinase activity	Gene Ontology	GO:0004550	5	18	1.81225e-08	1.11406e-06	NME4|AK9|AK1|NME2|NME3	http://amigo.geneontology.org/amigo/term/GO:0004550
desmosome	Gene Ontology	GO:0030057	5	24	6.28555e-08	3.33705e-06	DSG3|PERP|PKP3|PKP1|POF1B	http://amigo.geneontology.org/amigo/term/GO:0030057
ATP binding	Gene Ontology	GO:0005524	21	1463	9.15635e-08	4.64983e-06	NME4|MKI67|AK9|NME2|NME3|HKDC1|AK2|AK1|PTK6|MST1R|PFKM|MYO1A|ATP10B|ATP8B1|PPIP5K1|MAPK6|STK24|MAPK13|DQX1|PYGL|PFKL	http://amigo.geneontology.org/amigo/term/GO:0005524
nucleus	Gene Ontology	GO:0005634	41	5208	8.81389e-07	3.67721e-05	MKI67|GAMT|OVOL1|C1orf106|ZNF57|LDHAL6B|GAPDH|CYCS|TPI1|GSKIP|PKP3|PKP1|MAPK13|FH|ZC3H12A|PITX1|FAM83G|S100A16|ETS2|ECT2|TUBA1C|ARHGEF5|PFKM|ADAP1|KLF5|STK24|KLF3|PTBP3|MAPK6|LDHA|LDHC|SH3RF2|PTK6|GAPDHS|SLC25A5|VDR|CS|AK9|IRF6|NME2|TRIM7	http://amigo.geneontology.org/amigo/term/GO:0005634
plasma membrane	Gene Ontology	GO:0005886	38	4619	8.81523e-07	3.67721e-05	ABHD17C|PTK6|MST1R|CEP55|GAPDH|MYO1A|ST14|PKP3|PKP1|S100A16|ADAP1|SMAGP|SDCBP2|ARHGEF5|CATSPER2|PVRL1|PERP|CAPN1|GOT2|DSG3|ALPPL2|CDCP1|SLC6A8|ATP10B|ATP1B3|RHOV|GGT7|GGT5|EPS8L3|MISP|ALPP|RAB28|APP|RHBDL2|ATP8B1|PPIP5K1|ALPI|ETS2	http://amigo.geneontology.org/amigo/term/GO:0005886
nucleoside diphosphate phosphorylation	Gene Ontology	GO:0006165	4	17	9.24066e-07	3.72176e-05	NME4|AK1|NME2|NME3	http://amigo.geneontology.org/amigo/term/GO:0006165
gluconeogenesis	Gene Ontology	GO:0006094	5	45	1.05524e-06	4.1084e-05	GOT2|ALDOC|GAPDH|TPI1|GAPDHS	http://amigo.geneontology.org/amigo/term/GO:0006094
mitochondrial matrix	Gene Ontology	GO:0005759	10	370	1.33433e-06	5.02743e-05	NME4|MRRF|GOT2|LDHAL6B|FH|CS|HIBADH|PPIF|ACO2|ETHE1	http://amigo.geneontology.org/amigo/term/GO:0005759
membrane	Gene Ontology	GO:0016020	23	2075	1.84326e-06	6.72789e-05	MKI67|ZDHHC13|CEP55|GAPDH|FAM83B|PYGB|PVRL1|KLF5|PFKL|RAPGEFL1|CAPN1|GOT1|REEP4|LDHB|PFKM|PLCB3|SLC25A5|STK24|NIPAL1|ZDHHC3|LDHA|FUT3|PPIF	http://amigo.geneontology.org/amigo/term/GO:0016020
leukotriene C4 gamma-glutamyl transferase activity	Gene Ontology	GO:0103068	3	5	2.53558e-06	8.71046e-05	GGT6|GGT7|GGT5	http://amigo.geneontology.org/amigo/term/GO:0103068
hypoglycin A gamma-glutamyl transpeptidase activity	Gene Ontology	GO:0102953	3	5	2.53558e-06	8.71046e-05	GGT6|GGT7|GGT5	http://amigo.geneontology.org/amigo/term/GO:0102953
pyruvate metabolic process	Gene Ontology	GO:0006090	4	23	2.6645e-06	8.8918e-05	LDHAL6B|LDHA|LDHB|LDHC	http://amigo.geneontology.org/amigo/term/GO:0006090
alkaline phosphatase activity	Gene Ontology	GO:0004035	3	6	3.79331e-06	0.000123072	ALPI|ALPP|ALPPL2	http://amigo.geneontology.org/amigo/term/GO:0004035
cornification	Gene Ontology	GO:0070268	6	111	4.44618e-06	0.000140355	CAPN1|ST14|PERP|PKP3|PKP1|DSG3	http://amigo.geneontology.org/amigo/term/GO:0070268
creatine metabolic process	Gene Ontology	GO:0006600	3	7	5.40468e-06	0.000166123	SLC6A8|GATM|GAMT	http://amigo.geneontology.org/amigo/term/GO:0006600
adenylate kinase activity	Gene Ontology	GO:0004017	3	8	7.41179e-06	0.000221973	AK2|AK9|AK1	http://amigo.geneontology.org/amigo/term/GO:0004017
carbohydrate metabolic process	Gene Ontology	GO:0005975	6	123	7.80504e-06	0.000225448	LDHAL6B|LDHAL6A|FUT2|CS|LDHB|LDHC	http://amigo.geneontology.org/amigo/term/GO:0005975
cell junction	Gene Ontology	GO:0030054	7	190	7.91386e-06	0.000225448	PLEKHG6|IRF6|GJB3|ARHGEF5|FERMT1|PKP3|SMAGP	http://amigo.geneontology.org/amigo/term/GO:0030054
glutathione hydrolase activity	Gene Ontology	GO:0036374	3	9	9.85625e-06	0.000267723	GGT6|GGT7|GGT5	http://amigo.geneontology.org/amigo/term/GO:0036374
fructose 1,6-bisphosphate metabolic process	Gene Ontology	GO:0030388	3	9	9.85625e-06	0.000267723	ALDOC|PFKL|PFKM	http://amigo.geneontology.org/amigo/term/GO:0030388
UTP biosynthetic process	Gene Ontology	GO:0006228	3	10	1.27793e-05	0.000331693	NME4|NME2|NME3	http://amigo.geneontology.org/amigo/term/GO:0006228
leukotriene D4 biosynthetic process	Gene Ontology	GO:1901750	3	10	1.27793e-05	0.000331693	GGT6|GGT7|GGT5	http://amigo.geneontology.org/amigo/term/GO:1901750
GTP biosynthetic process	Gene Ontology	GO:0006183	3	11	1.62215e-05	0.000371505	NME4|NME2|NME3	http://amigo.geneontology.org/amigo/term/GO:0006183
CTP biosynthetic process	Gene Ontology	GO:0006241	3	11	1.62215e-05	0.000371505	NME4|NME2|NME3	http://amigo.geneontology.org/amigo/term/GO:0006241
purine nucleotide metabolic process	Gene Ontology	GO:0006163	3	11	1.62215e-05	0.000371505	AK2|AK9|AK1	http://amigo.geneontology.org/amigo/term/GO:0006163
cell-cell adhesion	Gene Ontology	GO:0098609	6	142	1.709e-05	0.000383868	TRIM29|PVRL1|PERP|PKP3|PKP1|DSG3	http://amigo.geneontology.org/amigo/term/GO:0098609
NAD binding	Gene Ontology	GO:0051287	4	39	1.79159e-05	0.000394827	HIBADH|GAPDHS|GAPDH|LDHA	http://amigo.geneontology.org/amigo/term/GO:0051287
oxidation-reduction process	Gene Ontology	GO:0055114	10	525	2.63707e-05	0.000570388	CBLC|VDR|HR|LDHAL6B|LDHAL6A|CYP2S1|RRM2|HIBADH|LDHA|LDHB	http://amigo.geneontology.org/amigo/term/GO:0055114
AMP binding	Gene Ontology	GO:0016208	3	14	3.00644e-05	0.000638458	PFKM|PFKL|PYGL	http://amigo.geneontology.org/amigo/term/GO:0016208
glutathione biosynthetic process	Gene Ontology	GO:0006750	3	15	3.5982e-05	0.000737315	GGT6|GGT7|GGT5	http://amigo.geneontology.org/amigo/term/GO:0006750
glycogen catabolic process	Gene Ontology	GO:0005980	3	16	4.26158e-05	0.000858193	PYGB|PYGL|PYGM	http://amigo.geneontology.org/amigo/term/GO:0005980
pyridoxal phosphate binding	Gene Ontology	GO:0030170	4	54	5.90645e-05	0.00113094	GOT2|PYGB|PYGL|PYGM	http://amigo.geneontology.org/amigo/term/GO:0030170
cell-cell junction	Gene Ontology	GO:0005911	6	183	6.71877e-05	0.00125157	ECT2|APP|PERP|PKP3|PKP1|DSG3	http://amigo.geneontology.org/amigo/term/GO:0005911
necroptotic process	Gene Ontology	GO:0070266	3	20	7.70678e-05	0.00140649	PPIF|PGAM5|PYGL	http://amigo.geneontology.org/amigo/term/GO:0070266
identical protein binding	Gene Ontology	GO:0042802	16	1456	8.6759e-05	0.00155899	TRIM29|NME2|PTK6|SDCBP2|CEP55|GAPDH|PVRL1|PFKM|PFKL|LDHB|RASEF|GOT2|APP|PYGL|LDHA|ETHE1	http://amigo.geneontology.org/amigo/term/GO:0042802
ficolin-1-rich granule lumen	Gene Ontology	GO:1904813	5	123	0.000105192	0.00186158	ALDOC|PFKL|PYGL|NME2|CAPN1	http://amigo.geneontology.org/amigo/term/GO:1904813
integral component of membrane	Gene Ontology	GO:0016021	28	3643	0.000110886	0.00193306	BRI3BP|ZDHHC13|SLC6A8|PGAM5|SMAGP|GJB3|GJB5|PVRL1|NDFIP2|KLF5|DSG3|TMEM54|GOT1|REEP4|CDCP1|ATP10B|TMPRSS4|GGT6|GGT7|GGT5|NIPAL1|ZDHHC3|ALPP|APP|RHBDL2|FUT3|FUT2|ALPI	http://amigo.geneontology.org/amigo/term/GO:0016021
actin filament binding	Gene Ontology	GO:0051015	6	208	0.000132798	0.002281	PLS1|POF1B|MYO1A|FERMT1|EPS8L3|MISP	http://amigo.geneontology.org/amigo/term/GO:0051015
protein palmitoylation	Gene Ontology	GO:0018345	3	26	0.00015651	0.00261147	ZDHHC3|ABHD17C|ZDHHC13	http://amigo.geneontology.org/amigo/term/GO:0018345
mitochondrial intermembrane space	Gene Ontology	GO:0005758	4	78	0.000227729	0.00364984	NME4|AK2|CYCS|GATM	http://amigo.geneontology.org/amigo/term/GO:0005758
citrate metabolic process	Gene Ontology	GO:0006101	2	5	0.000267858	0.00386245	CS|ACO2	http://amigo.geneontology.org/amigo/term/GO:0006101
peptidyltransferase activity	Gene Ontology	GO:0000048	2	5	0.000267858	0.00386245	GGT7|GGT5	http://amigo.geneontology.org/amigo/term/GO:0000048
regulation of microvillus assembly	Gene Ontology	GO:0032534	2	5	0.000267858	0.00386245	KLF5|ATP8B1	http://amigo.geneontology.org/amigo/term/GO:0032534
fructose binding	Gene Ontology	GO:0070061	2	5	0.000267858	0.00386245	PFKM|PFKL	http://amigo.geneontology.org/amigo/term/GO:0070061
fructose-6-phosphate binding	Gene Ontology	GO:0070095	2	5	0.000267858	0.00386245	PFKM|PFKL	http://amigo.geneontology.org/amigo/term/GO:0070095
cellular response to sodium arsenite	Gene Ontology	GO:1903936	2	5	0.000267858	0.00386245	ZC3H12A|MAPK13	http://amigo.geneontology.org/amigo/term/GO:1903936
adherens junction	Gene Ontology	GO:0005912	5	155	0.000297497	0.00423752	PVRL1|PKP3|TRIM29|PKP1|POF1B	http://amigo.geneontology.org/amigo/term/GO:0005912
protein kinase binding	Gene Ontology	GO:0019901	8	461	0.000318119	0.00447667	FAM83H|GSKIP|MAPK6|TUBA4A|FAM83B|FAM83G|FAM83F|FAM83E	http://amigo.geneontology.org/amigo/term/GO:0019901
tricarboxylic acid cycle	Gene Ontology	GO:0006099	3	34	0.000325857	0.00453097	FH|CS|ACO2	http://amigo.geneontology.org/amigo/term/GO:0006099
negative regulation of stem cell proliferation	Gene Ontology	GO:2000647	2	6	0.000356299	0.00478342	FERMT1|OVOL1	http://amigo.geneontology.org/amigo/term/GO:2000647
desmosome organization	Gene Ontology	GO:0002934	2	6	0.000356299	0.00478342	PVRL1|PERP	http://amigo.geneontology.org/amigo/term/GO:0002934
AMP metabolic process	Gene Ontology	GO:0046033	2	6	0.000356299	0.00478342	AK2|AK1	http://amigo.geneontology.org/amigo/term/GO:0046033
glucose catabolic process	Gene Ontology	GO:0006007	2	7	0.000457015	0.00604025	PFKM|PFKL	http://amigo.geneontology.org/amigo/term/GO:0006007
NADP binding	Gene Ontology	GO:0050661	3	39	0.000475144	0.00616486	HIBADH|GAPDH|GAPDHS	http://amigo.geneontology.org/amigo/term/GO:0050661
GTP binding	Gene Ontology	GO:0005525	7	373	0.00048031	0.00616486	RAB25|TUBA1C|ARHGEF5|RHOV|RAB28|RASEF|TUBA4A	http://amigo.geneontology.org/amigo/term/GO:0005525
nucleoside triphosphate biosynthetic process	Gene Ontology	GO:0009142	2	8	0.000569917	0.00723547	AK1|NME2	http://amigo.geneontology.org/amigo/term/GO:0009142
positive regulation of I-kappaB kinase/NF-kappaB signaling	Gene Ontology	GO:0043123	5	185	0.000651046	0.00817658	NDFIP2|ZDHHC13|GOT1|ECT2|C1orf106	http://amigo.geneontology.org/amigo/term/GO:0043123
cornified envelope	Gene Ontology	GO:0001533	3	44	0.000662342	0.00822996	DSG3|PKP3|PKP1	http://amigo.geneontology.org/amigo/term/GO:0001533
monosaccharide binding	Gene Ontology	GO:0048029	2	9	0.000694919	0.00845484	PFKM|PFKL	http://amigo.geneontology.org/amigo/term/GO:0048029
fucosyltransferase activity	Gene Ontology	GO:0008417	2	9	0.000694919	0.00845484	FUT3|FUT2	http://amigo.geneontology.org/amigo/term/GO:0008417
Notch signaling pathway	Gene Ontology	GO:0007219	4	110	0.000794836	0.00957081	APP|PERP|DTX2|NRARP	http://amigo.geneontology.org/amigo/term/GO:0007219
intermediate filament binding	Gene Ontology	GO:0019215	2	10	0.000831931	0.00991526	PKP1|NME2	http://amigo.geneontology.org/amigo/term/GO:0019215
secretory granule lumen	Gene Ontology	GO:0034774	4	114	0.000903972	0.0106079	ALDOC|PFKL|PYGL|NME2	http://amigo.geneontology.org/amigo/term/GO:0034774
cadherin binding	Gene Ontology	GO:0045296	6	305	0.000962639	0.0106079	PLCB3|STK24|LAD1|PKP1|PKP3|LDHA	http://amigo.geneontology.org/amigo/term/GO:0045296
messenger ribonucleoprotein complex	Gene Ontology	GO:1990124	2	11	0.000980868	0.0106079	PKP3|PKP1	http://amigo.geneontology.org/amigo/term/GO:1990124
ciliary rootlet	Gene Ontology	GO:0035253	2	11	0.000980868	0.0106079	RAB28|APP	http://amigo.geneontology.org/amigo/term/GO:0035253
keratinocyte proliferation	Gene Ontology	GO:0043616	2	11	0.000980868	0.0106079	FERMT1|IRF6	http://amigo.geneontology.org/amigo/term/GO:0043616
fucosylation	Gene Ontology	GO:0036065	2	11	0.000980868	0.0106079	FUT3|FUT2	http://amigo.geneontology.org/amigo/term/GO:0036065
glucose binding	Gene Ontology	GO:0005536	2	11	0.000980868	0.0106079	HKDC1|PYGL	http://amigo.geneontology.org/amigo/term/GO:0005536
cardiolipin binding	Gene Ontology	GO:1901612	2	11	0.000980868	0.0106079	NME4|ATP8B1	http://amigo.geneontology.org/amigo/term/GO:1901612
glutathione catabolic process	Gene Ontology	GO:0006751	2	11	0.000980868	0.0106079	GGT7|GGT5	http://amigo.geneontology.org/amigo/term/GO:0006751
nucleoside monophosphate phosphorylation	Gene Ontology	GO:0046940	2	11	0.000980868	0.0106079	AK2|AK1	http://amigo.geneontology.org/amigo/term/GO:0046940
negative regulation of gene expression	Gene Ontology	GO:0010629	5	210	0.00113144	0.0120507	ZC3H12A|APP|VDR|FERMT1|NDFIP2	http://amigo.geneontology.org/amigo/term/GO:0010629
fructose 6-phosphate metabolic process	Gene Ontology	GO:0006002	2	12	0.00114164	0.0120507	PFKM|PFKL	http://amigo.geneontology.org/amigo/term/GO:0006002
proteolysis	Gene Ontology	GO:0006508	7	434	0.00114523	0.0120507	RHBDL2|TMPRSS4|ST14|GGT6|GGT7|CAPN1|GGT5	http://amigo.geneontology.org/amigo/term/GO:0006508
cleavage furrow	Gene Ontology	GO:0032154	3	54	0.00116417	0.0121407	CEP55|PLEKHG6|ECT2	http://amigo.geneontology.org/amigo/term/GO:0032154
guanyl-nucleotide exchange factor activity	Gene Ontology	GO:0005085	4	123	0.0011874	0.0122733	RAPGEFL1|ARHGEF5|PLEKHG6|SH2D3A	http://amigo.geneontology.org/amigo/term/GO:0005085
GTPase activity	Gene Ontology	GO:0003924	6	320	0.00122504	0.0124683	RAB25|TUBA1C|RHOV|RAB28|RASEF|TUBA4A	http://amigo.geneontology.org/amigo/term/GO:0003924
magnesium ion binding	Gene Ontology	GO:0000287	5	214	0.00122761	0.0124683	ATP10B|ALPI|ALPP|ENO4|ATP8B1	http://amigo.geneontology.org/amigo/term/GO:0000287
iron ion binding	Gene Ontology	GO:0005506	4	127	0.00133134	0.0134052	CYP2S1|ACO2|VDR|ETHE1	http://amigo.geneontology.org/amigo/term/GO:0005506
intrinsic apoptotic signaling pathway in response to oxidative stress	Gene Ontology	GO:0008631	2	14	0.00149836	0.014958	GSKIP|STK24	http://amigo.geneontology.org/amigo/term/GO:0008631
multicellular organism development	Gene Ontology	GO:0007275	7	462	0.00162659	0.0161005	VDR|CEP55|MST1R|CATSPER2|GATM|TPI1|KLF3	http://amigo.geneontology.org/amigo/term/GO:0007275
cellular response to peptide	Gene Ontology	GO:1901653	2	15	0.00169413	0.0162657	KLF5|KLF3	http://amigo.geneontology.org/amigo/term/GO:1901653
magnesium ion transmembrane transport	Gene Ontology	GO:1903830	2	15	0.00169413	0.0162657	NIPAL1|ZDHHC13	http://amigo.geneontology.org/amigo/term/GO:1903830
ATPase-coupled intramembrane lipid transporter activity	Gene Ontology	GO:0140326	2	15	0.00169413	0.0162657	ATP8B1|ATP10B	http://amigo.geneontology.org/amigo/term/GO:0140326
regulation of translation	Gene Ontology	GO:0006417	3	63	0.00177814	0.0167489	PTBP3|APP|PKP3	http://amigo.geneontology.org/amigo/term/GO:0006417
regulation of gene expression	Gene Ontology	GO:0010468	5	235	0.00183477	0.017144	ZC3H12A|TMPRSS4|APP|MAPK6|MAPK13	http://amigo.geneontology.org/amigo/term/GO:0010468
epithelial cell morphogenesis	Gene Ontology	GO:0003382	2	16	0.0019014	0.0174869	RAB25|POF1B	http://amigo.geneontology.org/amigo/term/GO:0003382
magnesium ion transmembrane transporter activity	Gene Ontology	GO:0015095	2	16	0.0019014	0.0174869	NIPAL1|ZDHHC13	http://amigo.geneontology.org/amigo/term/GO:0015095
neutrophil degranulation	Gene Ontology	GO:0043312	7	482	0.00205752	0.0187595	CAPN1|NME2|PYGB|PFKL|PKP1|ALDOC|PYGL	http://amigo.geneontology.org/amigo/term/GO:0043312
cellular response to hydrogen peroxide	Gene Ontology	GO:0070301	3	67	0.00210488	0.0187595	PPIF|ECT2|MAPK13	http://amigo.geneontology.org/amigo/term/GO:0070301
flagellated sperm motility	Gene Ontology	GO:0030317	3	67	0.00210488	0.0187595	GAPDHS|CATSPER2|LDHC	http://amigo.geneontology.org/amigo/term/GO:0030317
microvillus assembly	Gene Ontology	GO:0030033	2	17	0.00212008	0.0187595	KLF5|MYO1A	http://amigo.geneontology.org/amigo/term/GO:0030033
positive regulation of keratinocyte differentiation	Gene Ontology	GO:0045618	2	17	0.00212008	0.0187595	VDR|NME2	http://amigo.geneontology.org/amigo/term/GO:0045618
cadherin binding involved in cell-cell adhesion	Gene Ontology	GO:0098641	2	18	0.00235009	0.0203326	PKP3|TRIM29	http://amigo.geneontology.org/amigo/term/GO:0098641
palmitoyltransferase activity	Gene Ontology	GO:0016409	2	18	0.00235009	0.0203326	ZDHHC3|ZDHHC13	http://amigo.geneontology.org/amigo/term/GO:0016409
cellular sodium ion homeostasis	Gene Ontology	GO:0006883	2	18	0.00235009	0.0203326	TMPRSS4|ATP1B3	http://amigo.geneontology.org/amigo/term/GO:0006883
intracellular signal transduction	Gene Ontology	GO:0035556	6	369	0.00247518	0.0212574	ASB9|ECT2|SDCBP2|ARHGEF5|MAPK6|MAPK13	http://amigo.geneontology.org/amigo/term/GO:0035556
intracellular membrane-bounded organelle	Gene Ontology	GO:0043231	9	788	0.00249779	0.0212951	ADAP1|GJB3|GAPDH|PVRL1|NDFIP2|KLF5|CYP2S1|PPIF|MISP	http://amigo.geneontology.org/amigo/term/GO:0043231
gap junction channel activity	Gene Ontology	GO:0005243	2	19	0.00259134	0.0217748	GJB3|GJB5	http://amigo.geneontology.org/amigo/term/GO:0005243
connexin complex	Gene Ontology	GO:0005922	2	19	0.00259134	0.0217748	GJB3|GJB5	http://amigo.geneontology.org/amigo/term/GO:0005922
GDP binding	Gene Ontology	GO:0019003	3	73	0.00266102	0.0222005	RAB28|NME2|RASEF	http://amigo.geneontology.org/amigo/term/GO:0019003
MAP kinase activity	Gene Ontology	GO:0004707	2	20	0.00284376	0.0235568	MAPK6|MAPK13	http://amigo.geneontology.org/amigo/term/GO:0004707
protein homodimerization activity	Gene Ontology	GO:0042803	8	660	0.00302447	0.0248773	CBLC|ZDHHC3|ECT2|SDCBP2|PVRL1|TPI1|RRM2|S100A16	http://amigo.geneontology.org/amigo/term/GO:0042803
Rac guanyl-nucleotide exchange factor activity	Gene Ontology	GO:0030676	2	21	0.00310725	0.0253795	EPS8L3|ECT2	http://amigo.geneontology.org/amigo/term/GO:0030676
cellular response to interleukin-1	Gene Ontology	GO:0071347	3	80	0.00341476	0.0275065	ZC3H12A|CCL16|MAPK13	http://amigo.geneontology.org/amigo/term/GO:0071347
positive regulation of transcription by RNA polymerase II	Gene Ontology	GO:0045944	11	1159	0.00353117	0.0280572	VDR|IRF6|NME2|APP|PFKM|ETS2|KLF5|KLF3|OVOL1|ZC3H12A|PITX1	http://amigo.geneontology.org/amigo/term/GO:0045944
regulation of Wnt signaling pathway	Gene Ontology	GO:0030111	2	23	0.00366715	0.0289408	APP|GSKIP	http://amigo.geneontology.org/amigo/term/GO:0030111
positive regulation of glycolytic process	Gene Ontology	GO:0045821	2	24	0.0039634	0.0310688	APP|GAPDHS	http://amigo.geneontology.org/amigo/term/GO:0045821
signal transduction	Gene Ontology	GO:0007165	10	1013	0.00408534	0.0318112	FAM83H|MST1R|KLF5|STK24|MAPK6|PKP1|FAM83B|FAM83G|FAM83F|FAM83E	http://amigo.geneontology.org/amigo/term/GO:0007165
metal ion binding	Gene Ontology	GO:0046872	17	2298	0.00416894	0.0322472	NME4|PFKM|SH3RF2|NME2|ZNF57|HR|NME3|RHOV|CYCS|ADAP1|KLF5|PFKL|KLF3|STK24|OVOL1|ZC3H12A|ALPPL2	http://amigo.geneontology.org/amigo/term/GO:0046872
phospholipid translocation	Gene Ontology	GO:0045332	2	25	0.00427039	0.0327265	ATP8B1|ATP10B	http://amigo.geneontology.org/amigo/term/GO:0045332
actin filament	Gene Ontology	GO:0005884	3	87	0.00428695	0.0327265	PLS1|POF1B|MISP	http://amigo.geneontology.org/amigo/term/GO:0005884
positive regulation of interleukin-6 production	Gene Ontology	GO:0032755	3	90	0.0046983	0.035404	APP|C1orf106|MAPK13	http://amigo.geneontology.org/amigo/term/GO:0032755
dephosphorylation	Gene Ontology	GO:0016311	3	91	0.00484053	0.0362419	ALPI|ALPP|ALPPL2	http://amigo.geneontology.org/amigo/term/GO:0016311
regulation of multicellular organism growth	Gene Ontology	GO:0040014	2	27	0.00491632	0.0363435	APP|GAMT	http://amigo.geneontology.org/amigo/term/GO:0040014
glycogen metabolic process	Gene Ontology	GO:0005977	2	28	0.0052551	0.0383622	PYGL|PYGM	http://amigo.geneontology.org/amigo/term/GO:0005977
protein-cysteine S-palmitoyltransferase activity	Gene Ontology	GO:0019706	2	28	0.0052551	0.0383622	ZDHHC3|ZDHHC13	http://amigo.geneontology.org/amigo/term/GO:0019706
cellular response to oxidative stress	Gene Ontology	GO:0034599	3	95	0.00543536	0.0393356	ZC3H12A|CYCS|NME2	http://amigo.geneontology.org/amigo/term/GO:0034599
nervous system development	Gene Ontology	GO:0007399	5	305	0.00545579	0.0393356	ZC3H12A|SDCBP2|RAPGEFL1|ECT2|MST1R	http://amigo.geneontology.org/amigo/term/GO:0007399
nuclear body	Gene Ontology	GO:0016604	5	307	0.00560332	0.0396717	HR|MKI67|ATP8B1|ECT2|PTK6	http://amigo.geneontology.org/amigo/term/GO:0016604
positive regulation of GTPase activity	Gene Ontology	GO:0043547	5	307	0.00560332	0.0396717	ADAP1|PGAM5|PLEKHG6|ECT2|CCL16	http://amigo.geneontology.org/amigo/term/GO:0043547
regulation of NMDA receptor activity	Gene Ontology	GO:2000310	2	29	0.00560431	0.0396717	APP|CAPN1	http://amigo.geneontology.org/amigo/term/GO:2000310
kinase binding	Gene Ontology	GO:0019900	3	97	0.00574849	0.0403102	PFKM|PFKL|LDHA	http://amigo.geneontology.org/amigo/term/GO:0019900
nucleoplasm	Gene Ontology	GO:0005654	23	3630	0.00592613	0.0407358	MKI67|VDR|DTX2|PTK6|HR|PKP3|PKP1|ZC3H12A|SMAGP|ECT2|ARHGEF5|ETS2|KLF5|STK24|MAPK6|UCHL3|KLF3|PLCB3|SH3RF2|ETHE1|AK9|IRF6|ATP8B1	http://amigo.geneontology.org/amigo/term/GO:0005654
response to tumor necrosis factor	Gene Ontology	GO:0034612	2	30	0.00596388	0.0407358	GGT7|GGT5	http://amigo.geneontology.org/amigo/term/GO:0034612
mesoderm development	Gene Ontology	GO:0007498	2	30	0.00596388	0.0407358	ETS2|OVOL1	http://amigo.geneontology.org/amigo/term/GO:0007498
structural constituent of cytoskeleton	Gene Ontology	GO:0005200	3	101	0.00640668	0.0435058	TUBA1C|PLS1|TUBA4A	http://amigo.geneontology.org/amigo/term/GO:0005200
anchored component of membrane	Gene Ontology	GO:0031225	3	102	0.00657794	0.0444106	ALPI|ALPP|ALPPL2	http://amigo.geneontology.org/amigo/term/GO:0031225
lymphocyte chemotaxis	Gene Ontology	GO:0048247	2	32	0.00671378	0.0448097	KLF5|CCL16	http://amigo.geneontology.org/amigo/term/GO:0048247
microtubule-based process	Gene Ontology	GO:0007017	2	32	0.00671378	0.0448097	TUBA1C|TUBA4A	http://amigo.geneontology.org/amigo/term/GO:0007017
ATP metabolic process	Gene Ontology	GO:0046034	2	33	0.00710395	0.0471444	AK2|AK1	http://amigo.geneontology.org/amigo/term/GO:0046034
glutathione metabolic process	Gene Ontology	GO:0006749	2	34	0.00750417	0.049519	CBLC|ETHE1	http://amigo.geneontology.org/amigo/term/GO:0006749
cell-cell junction assembly	Gene Ontology	GO:0007043	2	35	0.00791436	0.0513554	PKP3|PKP1	http://amigo.geneontology.org/amigo/term/GO:0007043
skin development	Gene Ontology	GO:0043588	2	35	0.00791436	0.0513554	GJB3|OVOL1	http://amigo.geneontology.org/amigo/term/GO:0043588
enzyme binding	Gene Ontology	GO:0019899	5	353	0.00982329	0.0630418	GOT2|MST1R|APP|PKP3|NME2	http://amigo.geneontology.org/amigo/term/GO:0019899
neuron apoptotic process	Gene Ontology	GO:0051402	2	40	0.0101122	0.0638436	APP|GAPDH	http://amigo.geneontology.org/amigo/term/GO:0051402
positive regulation of protein import into nucleus	Gene Ontology	GO:0042307	2	40	0.0101122	0.0638436	ZC3H12A|ECT2	http://amigo.geneontology.org/amigo/term/GO:0042307
cell migration	Gene Ontology	GO:0016477	4	232	0.01072	0.0673168	PTK6|MST1R|RHOV|MISP	http://amigo.geneontology.org/amigo/term/GO:0016477
endoplasmic reticulum	Gene Ontology	GO:0005783	9	1018	0.0124041	0.0770638	ZDHHC3|ZDHHC13|ATP10B|TMPRSS4|NDFIP2|ATP8B1|CYP2S1|GOT1|REEP4	http://amigo.geneontology.org/amigo/term/GO:0005783
lactation	Gene Ontology	GO:0007595	2	46	0.013063	0.0807281	GOT2|VDR	http://amigo.geneontology.org/amigo/term/GO:0007595
microtubule cytoskeleton organization	Gene Ontology	GO:0000226	3	133	0.0132742	0.0816011	TUBA1C|TUBA4A|GAPDH	http://amigo.geneontology.org/amigo/term/GO:0000226
inositol phosphate metabolic process	Gene Ontology	GO:0043647	2	47	0.013587	0.0830872	PPIP5K1|PLCB3	http://amigo.geneontology.org/amigo/term/GO:0043647
mitochondrial inner membrane	Gene Ontology	GO:0005743	5	385	0.0138007	0.0835222	NME4|GOT2|CYCS|SLC25A5|GATM	http://amigo.geneontology.org/amigo/term/GO:0005743
heme binding	Gene Ontology	GO:0020037	3	135	0.0138012	0.0835222	CYP2S1|VDR|CYCS	http://amigo.geneontology.org/amigo/term/GO:0020037
Rho guanyl-nucleotide exchange factor activity	Gene Ontology	GO:0005089	2	48	0.0141201	0.0841441	ARHGEF5|ECT2	http://amigo.geneontology.org/amigo/term/GO:0005089
response to hydrogen peroxide	Gene Ontology	GO:0042542	2	48	0.0141201	0.0841441	STK24|LDHA	http://amigo.geneontology.org/amigo/term/GO:0042542
chemokine activity	Gene Ontology	GO:0008009	2	48	0.0141201	0.0841441	KLF5|CCL16	http://amigo.geneontology.org/amigo/term/GO:0008009
response to lipopolysaccharide	Gene Ontology	GO:0032496	3	137	0.01434	0.0845915	VDR|GGT7|GGT5	http://amigo.geneontology.org/amigo/term/GO:0032496
skeletal system development	Gene Ontology	GO:0001501	3	137	0.01434	0.0845915	ETS2|PITX1|VDR	http://amigo.geneontology.org/amigo/term/GO:0001501
positive regulation of gene expression	Gene Ontology	GO:0010628	5	391	0.0146512	0.085993	ZC3H12A|APP|VDR|PKP3|PKP1	http://amigo.geneontology.org/amigo/term/GO:0010628
regulation of small GTPase mediated signal transduction	Gene Ontology	GO:0051056	3	139	0.0148906	0.0869612	ARHGEF5|RHOV|ECT2	http://amigo.geneontology.org/amigo/term/GO:0051056
basal plasma membrane	Gene Ontology	GO:0009925	2	50	0.0152129	0.0879636	MST1R|MYO1A	http://amigo.geneontology.org/amigo/term/GO:0009925
cell population proliferation	Gene Ontology	GO:0008283	3	142	0.0157387	0.0894287	MKI67|SDCBP2|FAM83B	http://amigo.geneontology.org/amigo/term/GO:0008283
cell periphery	Gene Ontology	GO:0071944	2	51	0.0157725	0.0894287	ARHGEF5|NME2	http://amigo.geneontology.org/amigo/term/GO:0071944
sequence-specific double-stranded DNA binding	Gene Ontology	GO:1990837	6	553	0.0161518	0.0904558	IRF6|ETS2|KLF5|KLF3|OVOL1|PITX1	http://amigo.geneontology.org/amigo/term/GO:1990837
sensory perception of sound	Gene Ontology	GO:0007605	3	144	0.016319	0.0904558	ATP8B1|TMPRSS4|MYO1A	http://amigo.geneontology.org/amigo/term/GO:0007605
cytoplasmic vesicle membrane	Gene Ontology	GO:0030659	3	144	0.016319	0.0904558	ATP10B|SMAGP|ZDHHC13	http://amigo.geneontology.org/amigo/term/GO:0030659
mitotic cytokinesis	Gene Ontology	GO:0000281	2	52	0.0163409	0.0904558	CEP55|ECT2	http://amigo.geneontology.org/amigo/term/GO:0000281
positive regulation of fat cell differentiation	Gene Ontology	GO:0045600	2	52	0.0163409	0.0904558	ZC3H12A|KLF5	http://amigo.geneontology.org/amigo/term/GO:0045600
spermatogenesis	Gene Ontology	GO:0007283	5	404	0.0166132	0.0915292	GJB3|GAMT|GGT7|OVOL1|GGT5	http://amigo.geneontology.org/amigo/term/GO:0007283
keratinocyte differentiation	Gene Ontology	GO:0030216	2	53	0.016918	0.0921517	ST14|IRF6	http://amigo.geneontology.org/amigo/term/GO:0030216
cortical actin cytoskeleton	Gene Ontology	GO:0030864	2	53	0.016918	0.0921517	MYO1A|MISP	http://amigo.geneontology.org/amigo/term/GO:0030864
extracellular region	Gene Ontology	GO:0005576	13	1843	0.0169629	0.0921517	CDCP1|CCL16|NME2|APP|PYGB|PVRL1|KLF5|PFKL|CAPN1|TUBA4A|ALDOC|PYGL|ALPPL2	http://amigo.geneontology.org/amigo/term/GO:0005576
GTPase activator activity	Gene Ontology	GO:0005096	4	268	0.0172019	0.0930174	ADAP1|PGAM5|PLEKHG6|ECT2	http://amigo.geneontology.org/amigo/term/GO:0005096
brush border	Gene Ontology	GO:0005903	2	54	0.0175036	0.0942128	PLS1|MYO1A	http://amigo.geneontology.org/amigo/term/GO:0005903
negative regulation of endopeptidase activity	Gene Ontology	GO:0010951	3	149	0.0178218	0.0950495	APP|SERPINB5|GAPDH	http://amigo.geneontology.org/amigo/term/GO:0010951
protein localization to plasma membrane	Gene Ontology	GO:0072659	3	152	0.0187593	0.0985873	ZDHHC3|PKP3|ATP1B3	http://amigo.geneontology.org/amigo/term/GO:0072659
positive regulation of interleukin-1 beta production	Gene Ontology	GO:0032731	2	57	0.0193114	0.0985873	APP|C1orf106	http://amigo.geneontology.org/amigo/term/GO:0032731
bicellular tight junction assembly	Gene Ontology	GO:0070830	2	59	0.0205583	0.0985873	ECT2|POF1B	http://amigo.geneontology.org/amigo/term/GO:0070830
rough endoplasmic reticulum	Gene Ontology	GO:0005791	2	59	0.0205583	0.0985873	ZC3H12A|APP	http://amigo.geneontology.org/amigo/term/GO:0005791
protein homotetramerization	Gene Ontology	GO:0051289	2	59	0.0205583	0.0985873	PFKM|PFKL	http://amigo.geneontology.org/amigo/term/GO:0051289
cell adhesion molecule binding	Gene Ontology	GO:0050839	2	59	0.0205583	0.0985873	PVRL1|PKP3	http://amigo.geneontology.org/amigo/term/GO:0050839
microtubule cytoskeleton	Gene Ontology	GO:0015630	3	158	0.020715	0.0985873	TUBA1C|TUBA4A|GAPDH	http://amigo.geneontology.org/amigo/term/GO:0015630
learning or memory	Gene Ontology	GO:0007611	2	60	0.0211941	0.0985873	GATM|APP	http://amigo.geneontology.org/amigo/term/GO:0007611
axon midline choice point recognition	Gene Ontology	GO:0016199	1	5	0.0214394	0.0985873	APP	http://amigo.geneontology.org/amigo/term/GO:0016199
regulation of vacuole fusion, non-autophagic	Gene Ontology	GO:0032889	1	5	0.0214394	0.0985873	ENO4	http://amigo.geneontology.org/amigo/term/GO:0032889
epididymis development	Gene Ontology	GO:1905867	1	5	0.0214394	0.0985873	GJB5	http://amigo.geneontology.org/amigo/term/GO:1905867
negative regulation of muscle cell apoptotic process	Gene Ontology	GO:0010656	1	5	0.0214394	0.0985873	ZC3H12A	http://amigo.geneontology.org/amigo/term/GO:0010656
sulfide oxidation, using sulfide:quinone oxidoreductase	Gene Ontology	GO:0070221	1	5	0.0214394	0.0985873	ETHE1	http://amigo.geneontology.org/amigo/term/GO:0070221
fructokinase activity	Gene Ontology	GO:0008865	1	5	0.0214394	0.0985873	HKDC1	http://amigo.geneontology.org/amigo/term/GO:0008865
negative regulation of oxidative phosphorylation	Gene Ontology	GO:0090324	1	5	0.0214394	0.0985873	PPIF	http://amigo.geneontology.org/amigo/term/GO:0090324
MRF binding	Gene Ontology	GO:0043426	1	5	0.0214394	0.0985873	KLF5	http://amigo.geneontology.org/amigo/term/GO:0043426
keratinocyte migration	Gene Ontology	GO:0051546	1	5	0.0214394	0.0985873	FERMT1	http://amigo.geneontology.org/amigo/term/GO:0051546
respirasome	Gene Ontology	GO:0070469	1	5	0.0214394	0.0985873	CYCS	http://amigo.geneontology.org/amigo/term/GO:0070469
glucokinase activity	Gene Ontology	GO:0004340	1	5	0.0214394	0.0985873	HKDC1	http://amigo.geneontology.org/amigo/term/GO:0004340
cytokine production involved in immune response	Gene Ontology	GO:0002367	1	5	0.0214394	0.0985873	C1orf106	http://amigo.geneontology.org/amigo/term/GO:0002367
vestibulocochlear nerve formation	Gene Ontology	GO:0021650	1	5	0.0214394	0.0985873	ATP8B1	http://amigo.geneontology.org/amigo/term/GO:0021650
synaptic growth at neuromuscular junction	Gene Ontology	GO:0051124	1	5	0.0214394	0.0985873	APP	http://amigo.geneontology.org/amigo/term/GO:0051124
carboxylic acid metabolic process	Gene Ontology	GO:0019752	1	5	0.0214394	0.0985873	LDHAL6A	http://amigo.geneontology.org/amigo/term/GO:0019752
MMXD complex	Gene Ontology	GO:0071817	1	5	0.0214394	0.0985873	SLC25A5	http://amigo.geneontology.org/amigo/term/GO:0071817
mannokinase activity	Gene Ontology	GO:0019158	1	5	0.0214394	0.0985873	HKDC1	http://amigo.geneontology.org/amigo/term/GO:0019158
pattern recognition receptor signaling pathway	Gene Ontology	GO:0002221	1	5	0.0214394	0.0985873	C1orf106	http://amigo.geneontology.org/amigo/term/GO:0002221
inositol 1,3,4,5 tetrakisphosphate binding	Gene Ontology	GO:0043533	1	5	0.0214394	0.0985873	ADAP1	http://amigo.geneontology.org/amigo/term/GO:0043533
negative regulation of transporter activity	Gene Ontology	GO:0032410	1	5	0.0214394	0.0985873	NDFIP2	http://amigo.geneontology.org/amigo/term/GO:0032410
negative regulation of protein localization to microtubule	Gene Ontology	GO:1902817	1	5	0.0214394	0.0985873	ABHD17C	http://amigo.geneontology.org/amigo/term/GO:1902817
axo-dendritic transport	Gene Ontology	GO:0008088	1	5	0.0214394	0.0985873	APP	http://amigo.geneontology.org/amigo/term/GO:0008088
inositol hexakisphosphate 5-kinase activity	Gene Ontology	GO:0000832	1	5	0.0214394	0.0985873	PPIP5K1	http://amigo.geneontology.org/amigo/term/GO:0000832
response to estrogen	Gene Ontology	GO:0043627	2	61	0.0218379	0.100026	VDR|LDHA	http://amigo.geneontology.org/amigo/term/GO:0043627
protein serine/threonine phosphatase activity	Gene Ontology	GO:0004722	2	62	0.0224899	0.10261	PGAM5|CYCS	http://amigo.geneontology.org/amigo/term/GO:0004722
cell surface	Gene Ontology	GO:0009986	6	598	0.0226291	0.102844	ALPP|APP|MST1R|GOT2|STRC|ALPI	http://amigo.geneontology.org/amigo/term/GO:0009986
mitochondrial outer membrane	Gene Ontology	GO:0005741	3	166	0.0234906	0.103048	PGAM5|VDR|BRI3BP	http://amigo.geneontology.org/amigo/term/GO:0005741
serine-type endopeptidase activity	Gene Ontology	GO:0004252	3	169	0.0245809	0.103048	RHBDL2|ST14|TMPRSS4	http://amigo.geneontology.org/amigo/term/GO:0004252
protein autophosphorylation	Gene Ontology	GO:0046777	3	170	0.0249503	0.103048	STK24|NME2|PTK6	http://amigo.geneontology.org/amigo/term/GO:0046777
negative regulation of protein transport	Gene Ontology	GO:0051224	1	6	0.0249679	0.103048	NDFIP2	http://amigo.geneontology.org/amigo/term/GO:0051224
positive regulation of potassium ion transmembrane transporter activity	Gene Ontology	GO:1901018	1	6	0.0249679	0.103048	ATP1B3	http://amigo.geneontology.org/amigo/term/GO:1901018
aspartate metabolic process	Gene Ontology	GO:0006531	1	6	0.0249679	0.103048	GOT2	http://amigo.geneontology.org/amigo/term/GO:0006531
isocitrate metabolic process	Gene Ontology	GO:0006102	1	6	0.0249679	0.103048	ACO2	http://amigo.geneontology.org/amigo/term/GO:0006102
hydroperoxy icosatetraenoate dehydratase activity	Gene Ontology	GO:0106256	1	6	0.0249679	0.103048	CYP2S1	http://amigo.geneontology.org/amigo/term/GO:0106256
vitamin metabolic process	Gene Ontology	GO:0006766	1	6	0.0249679	0.103048	VDR	http://amigo.geneontology.org/amigo/term/GO:0006766
demethylase activity	Gene Ontology	GO:0032451	1	6	0.0249679	0.103048	CBLC	http://amigo.geneontology.org/amigo/term/GO:0032451
G1 to G0 transition	Gene Ontology	GO:0070314	1	6	0.0249679	0.103048	VDR	http://amigo.geneontology.org/amigo/term/GO:0070314
negative regulation of RNA splicing	Gene Ontology	GO:0033119	1	6	0.0249679	0.103048	PTBP3	http://amigo.geneontology.org/amigo/term/GO:0033119
regulation of hair cycle	Gene Ontology	GO:0042634	1	6	0.0249679	0.103048	EPS8L3	http://amigo.geneontology.org/amigo/term/GO:0042634
4-galactosyl-N-acetylglucosaminide 3-alpha-L-fucosyltransferase activity	Gene Ontology	GO:0017083	1	6	0.0249679	0.103048	FUT3	http://amigo.geneontology.org/amigo/term/GO:0017083
response to isolation stress	Gene Ontology	GO:0035900	1	6	0.0249679	0.103048	ACO2	http://amigo.geneontology.org/amigo/term/GO:0035900
protein localization to photoreceptor outer segment	Gene Ontology	GO:1903546	1	6	0.0249679	0.103048	ZDHHC3	http://amigo.geneontology.org/amigo/term/GO:1903546
mammary gland involution	Gene Ontology	GO:0060056	1	6	0.0249679	0.103048	CAPN1	http://amigo.geneontology.org/amigo/term/GO:0060056
tumor necrosis factor production	Gene Ontology	GO:0032640	1	6	0.0249679	0.103048	APP	http://amigo.geneontology.org/amigo/term/GO:0032640
5-phosphoribose 1-diphosphate biosynthetic process	Gene Ontology	GO:0006015	1	6	0.0249679	0.103048	PYGL	http://amigo.geneontology.org/amigo/term/GO:0006015
TRAIL-activated apoptotic signaling pathway	Gene Ontology	GO:0036462	1	6	0.0249679	0.103048	ZDHHC3	http://amigo.geneontology.org/amigo/term/GO:0036462
response to peptidoglycan	Gene Ontology	GO:0032494	1	6	0.0249679	0.103048	C1orf106	http://amigo.geneontology.org/amigo/term/GO:0032494
cell-cell recognition	Gene Ontology	GO:0009988	1	6	0.0249679	0.103048	FUT3	http://amigo.geneontology.org/amigo/term/GO:0009988
negative regulation by host of viral genome replication	Gene Ontology	GO:0044828	1	6	0.0249679	0.103048	ZC3H12A	http://amigo.geneontology.org/amigo/term/GO:0044828
keratin filament binding	Gene Ontology	GO:1990254	1	6	0.0249679	0.103048	FAM83H	http://amigo.geneontology.org/amigo/term/GO:1990254
response to glucose	Gene Ontology	GO:0009749	2	67	0.0258682	0.106014	PFKL|LDHA	http://amigo.geneontology.org/amigo/term/GO:0009749
cellular response to retinoic acid	Gene Ontology	GO:0071300	2	67	0.0258682	0.106014	GJB3|PTK6	http://amigo.geneontology.org/amigo/term/GO:0071300
translation	Gene Ontology	GO:0006412	3	173	0.0260766	0.106124	GGT5|MRRF|GGT7	http://amigo.geneontology.org/amigo/term/GO:0006412
vesicle	Gene Ontology	GO:0031982	3	173	0.0260766	0.106124	TUBA1C|GAPDH|MYO1A	http://amigo.geneontology.org/amigo/term/GO:0031982
keratinization	Gene Ontology	GO:0031424	3	175	0.0268424	0.106291	DSG3|PKP3|PKP1	http://amigo.geneontology.org/amigo/term/GO:0031424
microvillus	Gene Ontology	GO:0005902	2	70	0.0279877	0.106291	PLEKHG6|MYO1A	http://amigo.geneontology.org/amigo/term/GO:0005902
regulation of macroautophagy	Gene Ontology	GO:0016241	2	70	0.0279877	0.106291	GAPDH|CAPN1	http://amigo.geneontology.org/amigo/term/GO:0016241
glycerol catabolic process	Gene Ontology	GO:0019563	1	7	0.0284839	0.106291	TPI1	http://amigo.geneontology.org/amigo/term/GO:0019563
modulation of excitatory postsynaptic potential	Gene Ontology	GO:0098815	1	7	0.0284839	0.106291	APP	http://amigo.geneontology.org/amigo/term/GO:0098815
negative regulation of T cell differentiation	Gene Ontology	GO:0045581	1	7	0.0284839	0.106291	NRARP	http://amigo.geneontology.org/amigo/term/GO:0045581
main axon	Gene Ontology	GO:0044304	1	7	0.0284839	0.106291	APP	http://amigo.geneontology.org/amigo/term/GO:0044304
self proteolysis	Gene Ontology	GO:0097264	1	7	0.0284839	0.106291	CAPN1	http://amigo.geneontology.org/amigo/term/GO:0097264
positive regulation of potassium ion import across plasma membrane	Gene Ontology	GO:1903288	1	7	0.0284839	0.106291	ATP1B3	http://amigo.geneontology.org/amigo/term/GO:1903288
phospholipase D activity	Gene Ontology	GO:0004630	1	7	0.0284839	0.106291	FAM83B	http://amigo.geneontology.org/amigo/term/GO:0004630
inner ear receptor cell development	Gene Ontology	GO:0060119	1	7	0.0284839	0.106291	ATP8B1	http://amigo.geneontology.org/amigo/term/GO:0060119
activation of cysteine-type endopeptidase activity involved in apoptotic process by cytochrome c	Gene Ontology	GO:0008635	1	7	0.0284839	0.106291	CYCS	http://amigo.geneontology.org/amigo/term/GO:0008635
kinocilium	Gene Ontology	GO:0060091	1	7	0.0284839	0.106291	STRC	http://amigo.geneontology.org/amigo/term/GO:0060091
Cdc42 protein signal transduction	Gene Ontology	GO:0032488	1	7	0.0284839	0.106291	RHOV	http://amigo.geneontology.org/amigo/term/GO:0032488
mating behavior	Gene Ontology	GO:0007617	1	7	0.0284839	0.106291	APP	http://amigo.geneontology.org/amigo/term/GO:0007617
blood vessel endothelial cell proliferation involved in sprouting angiogenesis	Gene Ontology	GO:0002043	1	7	0.0284839	0.106291	NRARP	http://amigo.geneontology.org/amigo/term/GO:0002043
cell-substrate junction	Gene Ontology	GO:0030055	1	7	0.0284839	0.106291	FERMT1	http://amigo.geneontology.org/amigo/term/GO:0030055
regulation of attachment of spindle microtubules to kinetochore	Gene Ontology	GO:0051988	1	7	0.0284839	0.106291	ECT2	http://amigo.geneontology.org/amigo/term/GO:0051988
inositol metabolic process	Gene Ontology	GO:0006020	1	7	0.0284839	0.106291	PPIP5K1	http://amigo.geneontology.org/amigo/term/GO:0006020
regulation of microvillus length	Gene Ontology	GO:0032532	1	7	0.0284839	0.106291	PLS1	http://amigo.geneontology.org/amigo/term/GO:0032532
aspartic-type endopeptidase inhibitor activity	Gene Ontology	GO:0019828	1	7	0.0284839	0.106291	GAPDH	http://amigo.geneontology.org/amigo/term/GO:0019828
fatty acid transport	Gene Ontology	GO:0015908	1	7	0.0284839	0.106291	GOT2	http://amigo.geneontology.org/amigo/term/GO:0015908
NEDD8-specific protease activity	Gene Ontology	GO:0019784	1	7	0.0284839	0.106291	UCHL3	http://amigo.geneontology.org/amigo/term/GO:0019784
extrinsic component of endoplasmic reticulum membrane	Gene Ontology	GO:0042406	1	7	0.0284839	0.106291	ZC3H12A	http://amigo.geneontology.org/amigo/term/GO:0042406
regulation of GTPase activity	Gene Ontology	GO:0043087	2	71	0.0287093	0.106791	ADAP1|ARHGEF5	http://amigo.geneontology.org/amigo/term/GO:0043087
positive regulation of protein ubiquitination	Gene Ontology	GO:0031398	2	72	0.0294382	0.10881	NDFIP2|C1orf106	http://amigo.geneontology.org/amigo/term/GO:0031398
drug binding	Gene Ontology	GO:0008144	2	72	0.0294382	0.10881	PYGL|NME2	http://amigo.geneontology.org/amigo/term/GO:0008144
endocytosis	Gene Ontology	GO:0006897	3	182	0.0296168	0.109124	APP|TMPRSS4|RHOV	http://amigo.geneontology.org/amigo/term/GO:0006897
Golgi apparatus	Gene Ontology	GO:0005794	8	1002	0.0304153	0.110536	PERP|ZDHHC3|APP|ATP8B1|NDFIP2|KLF5|STK24|FUT2	http://amigo.geneontology.org/amigo/term/GO:0005794
cell adhesion	Gene Ontology	GO:0007155	5	478	0.0311164	0.110536	PVRL1|APP|FERMT1|PKP1|NME2	http://amigo.geneontology.org/amigo/term/GO:0007155
protein localization to cell junction	Gene Ontology	GO:1902414	1	8	0.0319872	0.110536	PVRL1	http://amigo.geneontology.org/amigo/term/GO:1902414
malate metabolic process	Gene Ontology	GO:0006108	1	8	0.0319872	0.110536	FH	http://amigo.geneontology.org/amigo/term/GO:0006108
glyoxylate metabolic process	Gene Ontology	GO:0046487	1	8	0.0319872	0.110536	GOT2	http://amigo.geneontology.org/amigo/term/GO:0046487
oxaloacetate metabolic process	Gene Ontology	GO:0006107	1	8	0.0319872	0.110536	GOT2	http://amigo.geneontology.org/amigo/term/GO:0006107
metal ion transport	Gene Ontology	GO:0030001	1	8	0.0319872	0.110536	NDFIP2	http://amigo.geneontology.org/amigo/term/GO:0030001
regulation of chromatin organization	Gene Ontology	GO:1902275	1	8	0.0319872	0.110536	MKI67	http://amigo.geneontology.org/amigo/term/GO:1902275
alpha-(1->3)-fucosyltransferase activity	Gene Ontology	GO:0046920	1	8	0.0319872	0.110536	FUT3	http://amigo.geneontology.org/amigo/term/GO:0046920
regulation of endothelial cell proliferation	Gene Ontology	GO:0001936	1	8	0.0319872	0.110536	FUT2	http://amigo.geneontology.org/amigo/term/GO:0001936
ribosome disassembly	Gene Ontology	GO:0032790	1	8	0.0319872	0.110536	MRRF	http://amigo.geneontology.org/amigo/term/GO:0032790
epidermal cell differentiation	Gene Ontology	GO:0009913	1	8	0.0319872	0.110536	OVOL1	http://amigo.geneontology.org/amigo/term/GO:0009913
drug transmembrane transport	Gene Ontology	GO:0006855	1	8	0.0319872	0.110536	ATP8B1	http://amigo.geneontology.org/amigo/term/GO:0006855
killing by host of symbiont cells	Gene Ontology	GO:0051873	1	8	0.0319872	0.110536	GAPDH	http://amigo.geneontology.org/amigo/term/GO:0051873
growth cone membrane	Gene Ontology	GO:0032584	1	8	0.0319872	0.110536	PVRL1	http://amigo.geneontology.org/amigo/term/GO:0032584
positive regulation of execution phase of apoptosis	Gene Ontology	GO:1900119	1	8	0.0319872	0.110536	ZC3H12A	http://amigo.geneontology.org/amigo/term/GO:1900119
nucleotide-binding oligomerization domain containing 2 signaling pathway	Gene Ontology	GO:0070431	1	8	0.0319872	0.110536	C1orf106	http://amigo.geneontology.org/amigo/term/GO:0070431
inositol hexakisphosphate kinase activity	Gene Ontology	GO:0000828	1	8	0.0319872	0.110536	PPIP5K1	http://amigo.geneontology.org/amigo/term/GO:0000828
protein C-terminus binding	Gene Ontology	GO:0008022	3	189	0.0325371	0.112104	MKI67|SDCBP2|PFKM	http://amigo.geneontology.org/amigo/term/GO:0008022
negative regulation of transcription by RNA polymerase II	Gene Ontology	GO:0000122	7	832	0.0328636	0.112896	VDR|TRIM29|NRARP|ETS2|KLF5|KLF3|OVOL1	http://amigo.geneontology.org/amigo/term/GO:0000122
neutrophil chemotaxis	Gene Ontology	GO:0030593	2	77	0.0331921	0.11369	KLF5|CCL16	http://amigo.geneontology.org/amigo/term/GO:0030593
RNA polymerase II cis-regulatory region sequence-specific DNA binding	Gene Ontology	GO:0000978	6	656	0.0332968	0.113715	VDR|APP|ETS2|KLF5|OVOL1|PITX1	http://amigo.geneontology.org/amigo/term/GO:0000978
tyrosine phosphorylation of STAT protein	Gene Ontology	GO:0007260	1	9	0.0354781	0.114637	PTK6	http://amigo.geneontology.org/amigo/term/GO:0007260
regulation of chromosome segregation	Gene Ontology	GO:0051983	1	9	0.0354781	0.114637	MKI67	http://amigo.geneontology.org/amigo/term/GO:0051983
intestinal epithelial cell differentiation	Gene Ontology	GO:0060575	1	9	0.0354781	0.114637	PTK6	http://amigo.geneontology.org/amigo/term/GO:0060575
regulation of vesicle-mediated transport	Gene Ontology	GO:0060627	1	9	0.0354781	0.114637	RAB25	http://amigo.geneontology.org/amigo/term/GO:0060627
L-fucose catabolic process	Gene Ontology	GO:0042355	1	9	0.0354781	0.114637	FUT2	http://amigo.geneontology.org/amigo/term/GO:0042355
cellular response to manganese ion	Gene Ontology	GO:0071287	1	9	0.0354781	0.114637	APP	http://amigo.geneontology.org/amigo/term/GO:0071287
establishment of centrosome localization	Gene Ontology	GO:0051660	1	9	0.0354781	0.114637	MISP	http://amigo.geneontology.org/amigo/term/GO:0051660
protein depalmitoylation	Gene Ontology	GO:0002084	1	9	0.0354781	0.114637	ABHD17C	http://amigo.geneontology.org/amigo/term/GO:0002084
cellular response to arsenic-containing substance	Gene Ontology	GO:0071243	1	9	0.0354781	0.114637	PPIF	http://amigo.geneontology.org/amigo/term/GO:0071243
amelogenesis	Gene Ontology	GO:0097186	1	9	0.0354781	0.114637	PERP	http://amigo.geneontology.org/amigo/term/GO:0097186
negative regulation of mitochondrial outer membrane permeabilization involved in apoptotic signaling pathway	Gene Ontology	GO:1901029	1	9	0.0354781	0.114637	SLC25A5	http://amigo.geneontology.org/amigo/term/GO:1901029
primitive streak formation	Gene Ontology	GO:0090009	1	9	0.0354781	0.114637	ETS2	http://amigo.geneontology.org/amigo/term/GO:0090009
cranial skeletal system development	Gene Ontology	GO:1904888	1	9	0.0354781	0.114637	CEP55	http://amigo.geneontology.org/amigo/term/GO:1904888
bile acid binding	Gene Ontology	GO:0032052	1	9	0.0354781	0.114637	PYGL	http://amigo.geneontology.org/amigo/term/GO:0032052
negative regulation of T-helper 17 cell differentiation	Gene Ontology	GO:2000320	1	9	0.0354781	0.114637	ZC3H12A	http://amigo.geneontology.org/amigo/term/GO:2000320
icosanoid metabolic process	Gene Ontology	GO:0006690	1	9	0.0354781	0.114637	CYP2S1	http://amigo.geneontology.org/amigo/term/GO:0006690
actin filament bundle	Gene Ontology	GO:0032432	1	9	0.0354781	0.114637	PLS1	http://amigo.geneontology.org/amigo/term/GO:0032432
modulation of age-related behavioral decline	Gene Ontology	GO:0090647	1	9	0.0354781	0.114637	APP	http://amigo.geneontology.org/amigo/term/GO:0090647
positive regulation of JNK cascade	Gene Ontology	GO:0046330	2	80	0.0355295	0.114637	APP|SH3RF2	http://amigo.geneontology.org/amigo/term/GO:0046330
cellular response to calcium ion	Gene Ontology	GO:0071277	2	81	0.0363225	0.116371	PPIF|ECT2	http://amigo.geneontology.org/amigo/term/GO:0071277
cell morphogenesis	Gene Ontology	GO:0000902	2	81	0.0363225	0.116371	VDR|ECT2	http://amigo.geneontology.org/amigo/term/GO:0000902
positive regulation of cell population proliferation	Gene Ontology	GO:0008284	5	501	0.0368557	0.116371	MST1R|KLF5|SLC25A5|RAB25|CAPN1	http://amigo.geneontology.org/amigo/term/GO:0008284
nuclear envelope lumen	Gene Ontology	GO:0005641	1	10	0.0389564	0.116371	APP	http://amigo.geneontology.org/amigo/term/GO:0005641
regulation of synapse assembly	Gene Ontology	GO:0051963	1	10	0.0389564	0.116371	PVRL1	http://amigo.geneontology.org/amigo/term/GO:0051963
phospholipase C activity	Gene Ontology	GO:0004629	1	10	0.0389564	0.116371	PLCB3	http://amigo.geneontology.org/amigo/term/GO:0004629
phosphatidylinositol bisphosphate binding	Gene Ontology	GO:1902936	1	10	0.0389564	0.116371	ADAP1	http://amigo.geneontology.org/amigo/term/GO:1902936
neuron projection maintenance	Gene Ontology	GO:1990535	1	10	0.0389564	0.116371	APP	http://amigo.geneontology.org/amigo/term/GO:1990535
growth factor receptor binding	Gene Ontology	GO:0070851	1	10	0.0389564	0.116371	APP	http://amigo.geneontology.org/amigo/term/GO:0070851
G-quadruplex DNA binding	Gene Ontology	GO:0051880	1	10	0.0389564	0.116371	NME2	http://amigo.geneontology.org/amigo/term/GO:0051880
phosphatidylinositol 3-kinase regulatory subunit binding	Gene Ontology	GO:0036312	1	10	0.0389564	0.116371	FAM83B	http://amigo.geneontology.org/amigo/term/GO:0036312
negative regulation of production of miRNAs involved in gene silencing by miRNA	Gene Ontology	GO:1903799	1	10	0.0389564	0.116371	ZC3H12A	http://amigo.geneontology.org/amigo/term/GO:1903799
negative regulation of macrophage activation	Gene Ontology	GO:0043031	1	10	0.0389564	0.116371	ZC3H12A	http://amigo.geneontology.org/amigo/term/GO:0043031
intestinal epithelial cell development	Gene Ontology	GO:0060576	1	10	0.0389564	0.116371	KLF5	http://amigo.geneontology.org/amigo/term/GO:0060576
retinoic acid 4-hydroxylase activity	Gene Ontology	GO:0008401	1	10	0.0389564	0.116371	CYP2S1	http://amigo.geneontology.org/amigo/term/GO:0008401
positive regulation of protein metabolic process	Gene Ontology	GO:0051247	1	10	0.0389564	0.116371	APP	http://amigo.geneontology.org/amigo/term/GO:0051247
regulation of mitochondrial membrane permeability	Gene Ontology	GO:0046902	1	10	0.0389564	0.116371	PPIF	http://amigo.geneontology.org/amigo/term/GO:0046902
alpha-catenin binding	Gene Ontology	GO:0045294	1	10	0.0389564	0.116371	PKP3	http://amigo.geneontology.org/amigo/term/GO:0045294
mitotic nuclear envelope reassembly	Gene Ontology	GO:0007084	1	10	0.0389564	0.116371	REEP4	http://amigo.geneontology.org/amigo/term/GO:0007084
rough endoplasmic reticulum membrane	Gene Ontology	GO:0030867	1	10	0.0389564	0.116371	ZC3H12A	http://amigo.geneontology.org/amigo/term/GO:0030867
cobalamin binding	Gene Ontology	GO:0031419	1	10	0.0389564	0.116371	CBLC	http://amigo.geneontology.org/amigo/term/GO:0031419
fructose metabolic process	Gene Ontology	GO:0006000	1	10	0.0389564	0.116371	ALDOC	http://amigo.geneontology.org/amigo/term/GO:0006000
CatSper complex	Gene Ontology	GO:0036128	1	10	0.0389564	0.116371	CATSPER2	http://amigo.geneontology.org/amigo/term/GO:0036128
-	Gene Ontology	GO:1904468	1	10	0.0389564	0.116371	ZC3H12A	http://amigo.geneontology.org/amigo/term/GO:1904468
amyloid fibril formation	Gene Ontology	GO:1990000	1	10	0.0389564	0.116371	APP	http://amigo.geneontology.org/amigo/term/GO:1990000
secretion by cell	Gene Ontology	GO:0032940	1	10	0.0389564	0.116371	KLF5	http://amigo.geneontology.org/amigo/term/GO:0032940
membrane repolarization	Gene Ontology	GO:0086009	1	10	0.0389564	0.116371	ATP1B3	http://amigo.geneontology.org/amigo/term/GO:0086009
peptidase activator activity	Gene Ontology	GO:0016504	1	10	0.0389564	0.116371	APP	http://amigo.geneontology.org/amigo/term/GO:0016504
receptor complex	Gene Ontology	GO:0043235	3	207	0.040709	0.120988	APP|VDR|MST1R	http://amigo.geneontology.org/amigo/term/GO:0043235
calcium ion binding	Gene Ontology	GO:0005509	6	693	0.0415701	0.123233	PLS1|PLCB3|RASEF|CAPN1|DSG3|S100A16	http://amigo.geneontology.org/amigo/term/GO:0005509
protein serine/threonine kinase activity	Gene Ontology	GO:0004674	4	357	0.0421613	0.123257	STK24|MAPK6|NME2|MAPK13	http://amigo.geneontology.org/amigo/term/GO:0004674
vitamin D metabolic process	Gene Ontology	GO:0042359	1	11	0.0424222	0.123257	VDR	http://amigo.geneontology.org/amigo/term/GO:0042359
inositol phosphate biosynthetic process	Gene Ontology	GO:0032958	1	11	0.0424222	0.123257	PPIP5K1	http://amigo.geneontology.org/amigo/term/GO:0032958
glucose 6-phosphate metabolic process	Gene Ontology	GO:0051156	1	11	0.0424222	0.123257	HKDC1	http://amigo.geneontology.org/amigo/term/GO:0051156
endoplasmic reticulum tubular network organization	Gene Ontology	GO:0071786	1	11	0.0424222	0.123257	REEP4	http://amigo.geneontology.org/amigo/term/GO:0071786
ferric iron binding	Gene Ontology	GO:0008199	1	11	0.0424222	0.123257	RRM2	http://amigo.geneontology.org/amigo/term/GO:0008199
regulation of synapse structure or activity	Gene Ontology	GO:0050803	1	11	0.0424222	0.123257	APP	http://amigo.geneontology.org/amigo/term/GO:0050803
sodium:potassium-exchanging ATPase activity	Gene Ontology	GO:0005391	1	11	0.0424222	0.123257	ATP1B3	http://amigo.geneontology.org/amigo/term/GO:0005391
Golgi cisterna membrane	Gene Ontology	GO:0032580	2	89	0.0429065	0.124354	FUT3|FUT2	http://amigo.geneontology.org/amigo/term/GO:0032580
positive regulation of peptidyl-serine phosphorylation	Gene Ontology	GO:0033138	2	90	0.0437586	0.125887	APP|SH2D3A	http://amigo.geneontology.org/amigo/term/GO:0033138
protein glycosylation	Gene Ontology	GO:0006486	2	91	0.0446171	0.126077	FUT3|FUT2	http://amigo.geneontology.org/amigo/term/GO:0006486
enamel mineralization	Gene Ontology	GO:0070166	1	12	0.0458757	0.126077	PVRL1	http://amigo.geneontology.org/amigo/term/GO:0070166
positive regulation of podosome assembly	Gene Ontology	GO:0071803	1	12	0.0458757	0.126077	ARHGEF5	http://amigo.geneontology.org/amigo/term/GO:0071803
neuron remodeling	Gene Ontology	GO:0016322	1	12	0.0458757	0.126077	APP	http://amigo.geneontology.org/amigo/term/GO:0016322
sodium:potassium-exchanging ATPase complex	Gene Ontology	GO:0005890	1	12	0.0458757	0.126077	ATP1B3	http://amigo.geneontology.org/amigo/term/GO:0005890
glutathione binding	Gene Ontology	GO:0043295	1	12	0.0458757	0.126077	CBLC	http://amigo.geneontology.org/amigo/term/GO:0043295
nucleoside metabolic process	Gene Ontology	GO:0009116	1	12	0.0458757	0.126077	NME4	http://amigo.geneontology.org/amigo/term/GO:0009116
S-adenosylmethionine-dependent methyltransferase activity	Gene Ontology	GO:0008757	1	12	0.0458757	0.126077	GAMT	http://amigo.geneontology.org/amigo/term/GO:0008757
astrocyte projection	Gene Ontology	GO:0097449	1	12	0.0458757	0.126077	APP	http://amigo.geneontology.org/amigo/term/GO:0097449
regulation of systemic arterial blood pressure	Gene Ontology	GO:0003073	1	12	0.0458757	0.126077	PLCB3	http://amigo.geneontology.org/amigo/term/GO:0003073
actin filament network formation	Gene Ontology	GO:0051639	1	12	0.0458757	0.126077	PLS1	http://amigo.geneontology.org/amigo/term/GO:0051639
negative regulation of ATPase activity	Gene Ontology	GO:0032780	1	12	0.0458757	0.126077	PPIF	http://amigo.geneontology.org/amigo/term/GO:0032780
response to muramyl dipeptide	Gene Ontology	GO:0032495	1	12	0.0458757	0.126077	C1orf106	http://amigo.geneontology.org/amigo/term/GO:0032495
positive regulation of mRNA catabolic process	Gene Ontology	GO:0061014	1	12	0.0458757	0.126077	ZC3H12A	http://amigo.geneontology.org/amigo/term/GO:0061014
-	Gene Ontology	GO:0045080	1	12	0.0458757	0.126077	APP	http://amigo.geneontology.org/amigo/term/GO:0045080
hepatocyte growth factor receptor signaling pathway	Gene Ontology	GO:0048012	1	12	0.0458757	0.126077	MST1R	http://amigo.geneontology.org/amigo/term/GO:0048012
negative regulation of long-term synaptic potentiation	Gene Ontology	GO:1900272	1	12	0.0458757	0.126077	APP	http://amigo.geneontology.org/amigo/term/GO:1900272
somite rostral/caudal axis specification	Gene Ontology	GO:0032525	1	12	0.0458757	0.126077	NRARP	http://amigo.geneontology.org/amigo/term/GO:0032525
lens morphogenesis in camera-type eye	Gene Ontology	GO:0002089	1	12	0.0458757	0.126077	PVRL1	http://amigo.geneontology.org/amigo/term/GO:0002089
negative regulation of transcription, DNA-templated	Gene Ontology	GO:0045892	5	536	0.0467672	0.127626	HR|ATP8B1|PITX1|VDR|OVOL1	http://amigo.geneontology.org/amigo/term/GO:0045892
small GTPase mediated signal transduction	Gene Ontology	GO:0007264	2	94	0.0472297	0.127815	RAPGEFL1|SH2D3A	http://amigo.geneontology.org/amigo/term/GO:0007264
cellular response to interferon-gamma	Gene Ontology	GO:0071346	2	95	0.0481128	0.127815	GAPDH|CCL16	http://amigo.geneontology.org/amigo/term/GO:0071346
ruffle membrane	Gene Ontology	GO:0032587	2	96	0.0490019	0.127815	FERMT1|EPS8L3	http://amigo.geneontology.org/amigo/term/GO:0032587
cell-matrix adhesion	Gene Ontology	GO:0007160	2	96	0.0490019	0.127815	STRC|FERMT1	http://amigo.geneontology.org/amigo/term/GO:0007160
cell-cell signaling	Gene Ontology	GO:0007267	3	224	0.049286	0.127815	GJB3|GJB5|CCL16	http://amigo.geneontology.org/amigo/term/GO:0007267
oligosaccharide biosynthetic process	Gene Ontology	GO:0009312	1	13	0.0493168	0.127815	FUT3	http://amigo.geneontology.org/amigo/term/GO:0009312
virion binding	Gene Ontology	GO:0046790	1	13	0.0493168	0.127815	PVRL1	http://amigo.geneontology.org/amigo/term/GO:0046790
suckling behavior	Gene Ontology	GO:0001967	1	13	0.0493168	0.127815	APP	http://amigo.geneontology.org/amigo/term/GO:0001967
detection of mechanical stimulus involved in sensory perception of sound	Gene Ontology	GO:0050910	1	13	0.0493168	0.127815	STRC	http://amigo.geneontology.org/amigo/term/GO:0050910
magnesium ion transport	Gene Ontology	GO:0015693	1	13	0.0493168	0.127815	NIPAL1	http://amigo.geneontology.org/amigo/term/GO:0015693
positive regulation of lipid storage	Gene Ontology	GO:0010884	1	13	0.0493168	0.127815	ZC3H12A	http://amigo.geneontology.org/amigo/term/GO:0010884
palmitoyl-(protein) hydrolase activity	Gene Ontology	GO:0008474	1	13	0.0493168	0.127815	ABHD17C	http://amigo.geneontology.org/amigo/term/GO:0008474
hydrolase activity, acting on ester bonds	Gene Ontology	GO:0016788	1	13	0.0493168	0.127815	ETHE1	http://amigo.geneontology.org/amigo/term/GO:0016788
receptor catabolic process	Gene Ontology	GO:0032801	1	13	0.0493168	0.127815	CAPN1	http://amigo.geneontology.org/amigo/term/GO:0032801
positive regulation of peptidase activity	Gene Ontology	GO:0010952	1	13	0.0493168	0.127815	APP	http://amigo.geneontology.org/amigo/term/GO:0010952
basement membrane organization	Gene Ontology	GO:0071711	1	13	0.0493168	0.127815	FERMT1	http://amigo.geneontology.org/amigo/term/GO:0071711
ribosomal large subunit binding	Gene Ontology	GO:0043023	1	13	0.0493168	0.127815	MRRF	http://amigo.geneontology.org/amigo/term/GO:0043023
negative regulation of protein import into nucleus	Gene Ontology	GO:0042308	1	13	0.0493168	0.127815	FERMT1	http://amigo.geneontology.org/amigo/term/GO:0042308
multivesicular body membrane	Gene Ontology	GO:0032585	1	13	0.0493168	0.127815	NDFIP2	http://amigo.geneontology.org/amigo/term/GO:0032585
positive regulation of synaptic transmission, GABAergic	Gene Ontology	GO:0032230	1	13	0.0493168	0.127815	ZDHHC3	http://amigo.geneontology.org/amigo/term/GO:0032230
establishment of epithelial cell polarity	Gene Ontology	GO:0090162	1	13	0.0493168	0.127815	FERMT1	http://amigo.geneontology.org/amigo/term/GO:0090162
mammary gland epithelial cell differentiation	Gene Ontology	GO:0060644	1	13	0.0493168	0.127815	IRF6	http://amigo.geneontology.org/amigo/term/GO:0060644
positive regulation of cold-induced thermogenesis	Gene Ontology	GO:0120162	2	97	0.049897	0.127815	FH|GATM	http://amigo.geneontology.org/amigo/term/GO:0120162
integrin-mediated signaling pathway	Gene Ontology	GO:0007229	2	97	0.049897	0.127815	FERMT1|NME2	http://amigo.geneontology.org/amigo/term/GO:0007229
sodium ion transmembrane transport	Gene Ontology	GO:0035725	2	97	0.049897	0.127815	SLC6A8|ATP1B3	http://amigo.geneontology.org/amigo/term/GO:0035725
cellular response to leukemia inhibitory factor	Gene Ontology	GO:1990830	2	97	0.049897	0.127815	KLF5|SLC25A5	http://amigo.geneontology.org/amigo/term/GO:1990830
ruffle	Gene Ontology	GO:0001726	2	98	0.050798	0.127815	NME2|PTK6	http://amigo.geneontology.org/amigo/term/GO:0001726
serine-type endopeptidase inhibitor activity	Gene Ontology	GO:0004867	2	98	0.050798	0.127815	APP|SERPINB5	http://amigo.geneontology.org/amigo/term/GO:0004867
bile acid metabolic process	Gene Ontology	GO:0008206	1	14	0.0527455	0.127815	ATP8B1	http://amigo.geneontology.org/amigo/term/GO:0008206
intestinal absorption	Gene Ontology	GO:0050892	1	14	0.0527455	0.127815	VDR	http://amigo.geneontology.org/amigo/term/GO:0050892
calcium activated cation channel activity	Gene Ontology	GO:0005227	1	14	0.0527455	0.127815	CATSPER2	http://amigo.geneontology.org/amigo/term/GO:0005227
trophoblast giant cell differentiation	Gene Ontology	GO:0060707	1	14	0.0527455	0.127815	GJB5	http://amigo.geneontology.org/amigo/term/GO:0060707
negative regulation of protein tyrosine kinase activity	Gene Ontology	GO:0061099	1	14	0.0527455	0.127815	PTK6	http://amigo.geneontology.org/amigo/term/GO:0061099
cellular potassium ion homeostasis	Gene Ontology	GO:0030007	1	14	0.0527455	0.127815	ATP1B3	http://amigo.geneontology.org/amigo/term/GO:0030007
mitochondrial electron transport, ubiquinol to cytochrome c	Gene Ontology	GO:0006122	1	14	0.0527455	0.127815	CYCS	http://amigo.geneontology.org/amigo/term/GO:0006122
macrophage chemotaxis	Gene Ontology	GO:0048246	1	14	0.0527455	0.127815	KLF5	http://amigo.geneontology.org/amigo/term/GO:0048246
ATPase-coupled cation transmembrane transporter activity	Gene Ontology	GO:0019829	1	14	0.0527455	0.127815	ATP1B3	http://amigo.geneontology.org/amigo/term/GO:0019829
histone demethylase activity (H3-K9 specific)	Gene Ontology	GO:0032454	1	14	0.0527455	0.127815	HR	http://amigo.geneontology.org/amigo/term/GO:0032454
establishment or maintenance of transmembrane electrochemical gradient	Gene Ontology	GO:0010248	1	14	0.0527455	0.127815	ATP1B3	http://amigo.geneontology.org/amigo/term/GO:0010248
negative regulation of keratinocyte proliferation	Gene Ontology	GO:0010839	1	14	0.0527455	0.127815	VDR	http://amigo.geneontology.org/amigo/term/GO:0010839
glutamate metabolic process	Gene Ontology	GO:0006536	1	14	0.0527455	0.127815	GOT2	http://amigo.geneontology.org/amigo/term/GO:0006536
sodium ion export across plasma membrane	Gene Ontology	GO:0036376	1	14	0.0527455	0.127815	ATP1B3	http://amigo.geneontology.org/amigo/term/GO:0036376
structural constituent of skin epidermis	Gene Ontology	GO:0030280	1	14	0.0527455	0.127815	PKP1	http://amigo.geneontology.org/amigo/term/GO:0030280
response to growth hormone	Gene Ontology	GO:0060416	1	14	0.0527455	0.127815	NME2	http://amigo.geneontology.org/amigo/term/GO:0060416
negative regulation of nitric oxide biosynthetic process	Gene Ontology	GO:0045019	1	14	0.0527455	0.127815	ZC3H12A	http://amigo.geneontology.org/amigo/term/GO:0045019
cellular copper ion homeostasis	Gene Ontology	GO:0006878	1	14	0.0527455	0.127815	APP	http://amigo.geneontology.org/amigo/term/GO:0006878
exoribonuclease activity	Gene Ontology	GO:0004532	1	14	0.0527455	0.127815	ZC3H12A	http://amigo.geneontology.org/amigo/term/GO:0004532
auditory receptor cell stereocilium organization	Gene Ontology	GO:0060088	1	14	0.0527455	0.127815	STRC	http://amigo.geneontology.org/amigo/term/GO:0060088
phosphorylation	Gene Ontology	GO:0016310	2	101	0.0535359	0.129462	AK2|PPIP5K1	http://amigo.geneontology.org/amigo/term/GO:0016310
innate immune response	Gene Ontology	GO:0045087	5	558	0.053736	0.129677	APP|MST1R|TRIM29|C1orf106|PTK6	http://amigo.geneontology.org/amigo/term/GO:0045087
histone H3-K9 demethylation	Gene Ontology	GO:0033169	1	15	0.056162	0.130946	HR	http://amigo.geneontology.org/amigo/term/GO:0033169
protein heterotetramerization	Gene Ontology	GO:0051290	1	15	0.056162	0.130946	RRM2	http://amigo.geneontology.org/amigo/term/GO:0051290
positive regulation of ruffle assembly	Gene Ontology	GO:1900029	1	15	0.056162	0.130946	EPS8L3	http://amigo.geneontology.org/amigo/term/GO:1900029
activation of cysteine-type endopeptidase activity	Gene Ontology	GO:0097202	1	15	0.056162	0.130946	PERP	http://amigo.geneontology.org/amigo/term/GO:0097202
erythrocyte maturation	Gene Ontology	GO:0043249	1	15	0.056162	0.130946	PTBP3	http://amigo.geneontology.org/amigo/term/GO:0043249
vacuole	Gene Ontology	GO:0005773	1	15	0.056162	0.130946	MST1R	http://amigo.geneontology.org/amigo/term/GO:0005773
integral component of presynaptic active zone membrane	Gene Ontology	GO:0099059	1	15	0.056162	0.130946	PVRL1	http://amigo.geneontology.org/amigo/term/GO:0099059
spindle pole centrosome	Gene Ontology	GO:0031616	1	15	0.056162	0.130946	MISP	http://amigo.geneontology.org/amigo/term/GO:0031616
positive regulation of cell adhesion mediated by integrin	Gene Ontology	GO:0033630	1	15	0.056162	0.130946	FERMT1	http://amigo.geneontology.org/amigo/term/GO:0033630
regulation of epithelial cell proliferation	Gene Ontology	GO:0050678	1	15	0.056162	0.130946	SERPINB5	http://amigo.geneontology.org/amigo/term/GO:0050678
glucocorticoid receptor binding	Gene Ontology	GO:0035259	1	15	0.056162	0.130946	ETS2	http://amigo.geneontology.org/amigo/term/GO:0035259
positive regulation of T cell migration	Gene Ontology	GO:2000406	1	15	0.056162	0.130946	APP	http://amigo.geneontology.org/amigo/term/GO:2000406
activation of GTPase activity	Gene Ontology	GO:0090630	2	104	0.0563251	0.130946	ARHGEF5|ECT2	http://amigo.geneontology.org/amigo/term/GO:0090630
motile cilium	Gene Ontology	GO:0031514	2	104	0.0563251	0.130946	CATSPER2|LDHC	http://amigo.geneontology.org/amigo/term/GO:0031514
membrane raft	Gene Ontology	GO:0045121	3	237	0.0563919	0.130946	APP|SLC25A5|LDHB	http://amigo.geneontology.org/amigo/term/GO:0045121
nuclear membrane	Gene Ontology	GO:0031965	3	237	0.0563919	0.130946	AK9|GAPDH|DTX2	http://amigo.geneontology.org/amigo/term/GO:0031965
muscle contraction	Gene Ontology	GO:0006936	2	105	0.057266	0.132449	SLC6A8|GAMT	http://amigo.geneontology.org/amigo/term/GO:0006936
response to estradiol	Gene Ontology	GO:0032355	2	105	0.057266	0.132449	GGT7|GGT5	http://amigo.geneontology.org/amigo/term/GO:0032355
NAD metabolic process	Gene Ontology	GO:0019674	1	16	0.0595662	0.135094	LDHA	http://amigo.geneontology.org/amigo/term/GO:0019674
cellular response to chemokine	Gene Ontology	GO:1990869	1	16	0.0595662	0.135094	ZC3H12A	http://amigo.geneontology.org/amigo/term/GO:1990869
mitochondrial proton-transporting ATP synthase complex	Gene Ontology	GO:0005753	1	16	0.0595662	0.135094	PPIF	http://amigo.geneontology.org/amigo/term/GO:0005753
endoplasmic reticulum tubular network	Gene Ontology	GO:0071782	1	16	0.0595662	0.135094	REEP4	http://amigo.geneontology.org/amigo/term/GO:0071782
midbody abscission	Gene Ontology	GO:0061952	1	16	0.0595662	0.135094	CEP55	http://amigo.geneontology.org/amigo/term/GO:0061952
lamin binding	Gene Ontology	GO:0005521	1	16	0.0595662	0.135094	PKP1	http://amigo.geneontology.org/amigo/term/GO:0005521
arachidonic acid epoxygenase activity	Gene Ontology	GO:0008392	1	16	0.0595662	0.135094	CYP2S1	http://amigo.geneontology.org/amigo/term/GO:0008392
response to vitamin D	Gene Ontology	GO:0033280	1	16	0.0595662	0.135094	VDR	http://amigo.geneontology.org/amigo/term/GO:0033280
2-oxoglutarate metabolic process	Gene Ontology	GO:0006103	1	16	0.0595662	0.135094	GOT2	http://amigo.geneontology.org/amigo/term/GO:0006103
cell cycle	Gene Ontology	GO:0007049	3	245	0.0609937	0.137594	MKI67|MAPK6|MAPK13	http://amigo.geneontology.org/amigo/term/GO:0007049
thiol-dependent ubiquitin-specific protease activity	Gene Ontology	GO:0004843	2	109	0.0610839	0.137594	ZC3H12A|UCHL3	http://amigo.geneontology.org/amigo/term/GO:0004843
RNA binding	Gene Ontology	GO:0003723	9	1366	0.0615726	0.137594	MKI67|GOT2|SLC25A5|CS|PTBP3|PKP3|DQX1|ZC3H12A|S100A16	http://amigo.geneontology.org/amigo/term/GO:0003723
cytoskeleton	Gene Ontology	GO:0005856	4	406	0.0616188	0.137594	ZC3H12A|ALDOC|FERMT1|TUBA4A	http://amigo.geneontology.org/amigo/term/GO:0005856
astrocyte activation	Gene Ontology	GO:0048143	1	17	0.0629583	0.137594	APP	http://amigo.geneontology.org/amigo/term/GO:0048143
protein complex oligomerization	Gene Ontology	GO:0051259	1	17	0.0629583	0.137594	ZC3H12A	http://amigo.geneontology.org/amigo/term/GO:0051259
leukotriene metabolic process	Gene Ontology	GO:0006691	1	17	0.0629583	0.137594	GGT5	http://amigo.geneontology.org/amigo/term/GO:0006691
3'-UTR-mediated mRNA destabilization	Gene Ontology	GO:0061158	1	17	0.0629583	0.137594	ZC3H12A	http://amigo.geneontology.org/amigo/term/GO:0061158
negative regulation of protein localization to nucleus	Gene Ontology	GO:1900181	1	17	0.0629583	0.137594	TRIM29	http://amigo.geneontology.org/amigo/term/GO:1900181
negative regulation of cytokine production involved in inflammatory response	Gene Ontology	GO:1900016	1	17	0.0629583	0.137594	ZC3H12A	http://amigo.geneontology.org/amigo/term/GO:1900016
Golgi-associated vesicle	Gene Ontology	GO:0005798	1	17	0.0629583	0.137594	APP	http://amigo.geneontology.org/amigo/term/GO:0005798
cellular respiration	Gene Ontology	GO:0045333	1	17	0.0629583	0.137594	CYCS	http://amigo.geneontology.org/amigo/term/GO:0045333
translation regulator activity	Gene Ontology	GO:0045182	1	17	0.0629583	0.137594	PKP3	http://amigo.geneontology.org/amigo/term/GO:0045182
apoptotic mitochondrial changes	Gene Ontology	GO:0008637	1	17	0.0629583	0.137594	PPIF	http://amigo.geneontology.org/amigo/term/GO:0008637
calcium-dependent cysteine-type endopeptidase activity	Gene Ontology	GO:0004198	1	17	0.0629583	0.137594	CAPN1	http://amigo.geneontology.org/amigo/term/GO:0004198
RNA phosphodiester bond hydrolysis	Gene Ontology	GO:0090501	1	17	0.0629583	0.137594	ZC3H12A	http://amigo.geneontology.org/amigo/term/GO:0090501
myosin V binding	Gene Ontology	GO:0031489	1	17	0.0629583	0.137594	RAB25	http://amigo.geneontology.org/amigo/term/GO:0031489
positive regulation of neuron projection development	Gene Ontology	GO:0010976	2	111	0.0630249	0.137594	NME2|PTK6	http://amigo.geneontology.org/amigo/term/GO:0010976
mitochondrial membrane	Gene Ontology	GO:0031966	2	111	0.0630249	0.137594	HKDC1|NME2	http://amigo.geneontology.org/amigo/term/GO:0031966
positive regulation of DNA-binding transcription factor activity	Gene Ontology	GO:0051091	2	112	0.0640031	0.13921	APP|ARHGEF5	http://amigo.geneontology.org/amigo/term/GO:0051091
iron ion transport	Gene Ontology	GO:0006826	1	18	0.0663382	0.140623	PVRL1	http://amigo.geneontology.org/amigo/term/GO:0006826
amino acid binding	Gene Ontology	GO:0016597	1	18	0.0663382	0.140623	GOT2	http://amigo.geneontology.org/amigo/term/GO:0016597
cell communication	Gene Ontology	GO:0007154	1	18	0.0663382	0.140623	CCL16	http://amigo.geneontology.org/amigo/term/GO:0007154
mitochondrial electron transport, cytochrome c to oxygen	Gene Ontology	GO:0006123	1	18	0.0663382	0.140623	CYCS	http://amigo.geneontology.org/amigo/term/GO:0006123
endosome lumen	Gene Ontology	GO:0031904	1	18	0.0663382	0.140623	APP	http://amigo.geneontology.org/amigo/term/GO:0031904
negative regulation of growth	Gene Ontology	GO:0045926	1	18	0.0663382	0.140623	PTK6	http://amigo.geneontology.org/amigo/term/GO:0045926
positive regulation of cell-cell adhesion	Gene Ontology	GO:0022409	1	18	0.0663382	0.140623	FUT3	http://amigo.geneontology.org/amigo/term/GO:0022409
retinoid X receptor binding	Gene Ontology	GO:0046965	1	18	0.0663382	0.140623	VDR	http://amigo.geneontology.org/amigo/term/GO:0046965
nuclear envelope organization	Gene Ontology	GO:0006998	1	18	0.0663382	0.140623	REEP4	http://amigo.geneontology.org/amigo/term/GO:0006998
sperm-egg recognition	Gene Ontology	GO:0035036	1	18	0.0663382	0.140623	CATSPER2	http://amigo.geneontology.org/amigo/term/GO:0035036
morphogenesis of an epithelium	Gene Ontology	GO:0002009	1	18	0.0663382	0.140623	SERPINB5	http://amigo.geneontology.org/amigo/term/GO:0002009
positive regulation of stress-activated MAPK cascade	Gene Ontology	GO:0032874	1	18	0.0663382	0.140623	C1orf106	http://amigo.geneontology.org/amigo/term/GO:0032874
postsynaptic cytosol	Gene Ontology	GO:0099524	1	18	0.0663382	0.140623	PLCB3	http://amigo.geneontology.org/amigo/term/GO:0099524
pseudopodium	Gene Ontology	GO:0031143	1	18	0.0663382	0.140623	RAB25	http://amigo.geneontology.org/amigo/term/GO:0031143
focal adhesion	Gene Ontology	GO:0005925	4	418	0.0669987	0.141509	FERMT1|NME2|CAPN1|MISP	http://amigo.geneontology.org/amigo/term/GO:0005925
intermediate filament	Gene Ontology	GO:0005882	2	117	0.0689705	0.142586	PKP1|NME2	http://amigo.geneontology.org/amigo/term/GO:0005882
cytoskeleton-dependent intracellular transport	Gene Ontology	GO:0030705	1	19	0.069706	0.142586	TUBA1C	http://amigo.geneontology.org/amigo/term/GO:0030705
cellular amino acid metabolic process	Gene Ontology	GO:0006520	1	19	0.069706	0.142586	GGT5	http://amigo.geneontology.org/amigo/term/GO:0006520
transition metal ion binding	Gene Ontology	GO:0046914	1	19	0.069706	0.142586	APP	http://amigo.geneontology.org/amigo/term/GO:0046914
intracellular transport	Gene Ontology	GO:0046907	1	19	0.069706	0.142586	SDCBP2	http://amigo.geneontology.org/amigo/term/GO:0046907
regulation of protein kinase activity	Gene Ontology	GO:0045859	1	19	0.069706	0.142586	ECT2	http://amigo.geneontology.org/amigo/term/GO:0045859
Golgi-associated vesicle membrane	Gene Ontology	GO:0030660	1	19	0.069706	0.142586	ZDHHC13	http://amigo.geneontology.org/amigo/term/GO:0030660
stereocilium tip	Gene Ontology	GO:0032426	1	19	0.069706	0.142586	STRC	http://amigo.geneontology.org/amigo/term/GO:0032426
response to lead ion	Gene Ontology	GO:0010288	1	19	0.069706	0.142586	APP	http://amigo.geneontology.org/amigo/term/GO:0010288
regulation of peptidyl-tyrosine phosphorylation	Gene Ontology	GO:0050730	1	19	0.069706	0.142586	APP	http://amigo.geneontology.org/amigo/term/GO:0050730
protein phosphatase type 2A complex	Gene Ontology	GO:0000159	1	19	0.069706	0.142586	CYCS	http://amigo.geneontology.org/amigo/term/GO:0000159
gap junction	Gene Ontology	GO:0005921	1	19	0.069706	0.142586	GJB3	http://amigo.geneontology.org/amigo/term/GO:0005921
cell development	Gene Ontology	GO:0048468	1	19	0.069706	0.142586	IRF6	http://amigo.geneontology.org/amigo/term/GO:0048468
organic acid metabolic process	Gene Ontology	GO:0006082	1	19	0.069706	0.142586	CYP2S1	http://amigo.geneontology.org/amigo/term/GO:0006082
positive regulation of amyloid-beta formation	Gene Ontology	GO:1902004	1	19	0.069706	0.142586	APP	http://amigo.geneontology.org/amigo/term/GO:1902004
response to osmotic stress	Gene Ontology	GO:0006970	1	19	0.069706	0.142586	MAPK13	http://amigo.geneontology.org/amigo/term/GO:0006970
vesicle transport along actin filament	Gene Ontology	GO:0030050	1	19	0.069706	0.142586	MYO1A	http://amigo.geneontology.org/amigo/term/GO:0030050
actin filament organization	Gene Ontology	GO:0007015	2	118	0.0699789	0.142894	MYO1A|POF1B	http://amigo.geneontology.org/amigo/term/GO:0007015
DNA-binding transcription factor activity	Gene Ontology	GO:0003700	5	607	0.0713164	0.144865	VDR|ETS2|PITX1|KLF3|IRF6	http://amigo.geneontology.org/amigo/term/GO:0003700
transcription regulatory region sequence-specific DNA binding	Gene Ontology	GO:0000976	3	263	0.0719644	0.145767	KLF5|KLF3|IRF6	http://amigo.geneontology.org/amigo/term/GO:0000976
positive regulation of proteolysis	Gene Ontology	GO:0045862	1	20	0.0730617	0.145874	PERP	http://amigo.geneontology.org/amigo/term/GO:0045862
epoxygenase P450 pathway	Gene Ontology	GO:0019373	1	20	0.0730617	0.145874	CYP2S1	http://amigo.geneontology.org/amigo/term/GO:0019373
prostaglandin metabolic process	Gene Ontology	GO:0006693	1	20	0.0730617	0.145874	CYP2S1	http://amigo.geneontology.org/amigo/term/GO:0006693
regulation of bone mineralization	Gene Ontology	GO:0030500	1	20	0.0730617	0.145874	VDR	http://amigo.geneontology.org/amigo/term/GO:0030500
cellular glucose homeostasis	Gene Ontology	GO:0001678	1	20	0.0730617	0.145874	HKDC1	http://amigo.geneontology.org/amigo/term/GO:0001678
regulation of long-term neuronal synaptic plasticity	Gene Ontology	GO:0048169	1	20	0.0730617	0.145874	APP	http://amigo.geneontology.org/amigo/term/GO:0048169
branched-chain amino acid catabolic process	Gene Ontology	GO:0009083	1	20	0.0730617	0.145874	HIBADH	http://amigo.geneontology.org/amigo/term/GO:0009083
hydro-lyase activity	Gene Ontology	GO:0016836	1	20	0.0730617	0.145874	CYP2S1	http://amigo.geneontology.org/amigo/term/GO:0016836
bicellular tight junction	Gene Ontology	GO:0005923	2	122	0.0740603	0.147615	ECT2|POF1B	http://amigo.geneontology.org/amigo/term/GO:0005923
Golgi membrane	Gene Ontology	GO:0000139	5	616	0.0748525	0.148242	NDFIP2|ZDHHC3|GOT1|FUT3|ZDHHC13	http://amigo.geneontology.org/amigo/term/GO:0000139
transmembrane receptor protein tyrosine kinase signaling pathway	Gene Ontology	GO:0007169	2	123	0.0750925	0.148242	MST1R|PTK6	http://amigo.geneontology.org/amigo/term/GO:0007169
platelet degranulation	Gene Ontology	GO:0002576	2	124	0.0761292	0.148242	TUBA4A|APP	http://amigo.geneontology.org/amigo/term/GO:0002576
response to muscle activity	Gene Ontology	GO:0014850	1	21	0.0764054	0.148242	GOT2	http://amigo.geneontology.org/amigo/term/GO:0014850
oligosaccharide metabolic process	Gene Ontology	GO:0009311	1	21	0.0764054	0.148242	FUT3	http://amigo.geneontology.org/amigo/term/GO:0009311
regulation of postsynapse organization	Gene Ontology	GO:0099175	1	21	0.0764054	0.148242	ABHD17C	http://amigo.geneontology.org/amigo/term/GO:0099175
ceramide metabolic process	Gene Ontology	GO:0006672	1	21	0.0764054	0.148242	FUT3	http://amigo.geneontology.org/amigo/term/GO:0006672
oxidoreductase activity, acting on paired donors, with incorporation or reduction of molecular oxygen, reduced flavin or flavoprotein as one donor, and incorporation of one atom of oxygen	Gene Ontology	GO:0016712	1	21	0.0764054	0.148242	CYP2S1	http://amigo.geneontology.org/amigo/term/GO:0016712
intermediate filament cytoskeleton organization	Gene Ontology	GO:0045104	1	21	0.0764054	0.148242	FAM83H	http://amigo.geneontology.org/amigo/term/GO:0045104
RNA stem-loop binding	Gene Ontology	GO:0035613	1	21	0.0764054	0.148242	ZC3H12A	http://amigo.geneontology.org/amigo/term/GO:0035613
muscle cell cellular homeostasis	Gene Ontology	GO:0046716	1	21	0.0764054	0.148242	PFKM	http://amigo.geneontology.org/amigo/term/GO:0046716
cobalamin metabolic process	Gene Ontology	GO:0009235	1	21	0.0764054	0.148242	CBLC	http://amigo.geneontology.org/amigo/term/GO:0009235
negative regulation of release of cytochrome c from mitochondria	Gene Ontology	GO:0090201	1	21	0.0764054	0.148242	PPIF	http://amigo.geneontology.org/amigo/term/GO:0090201
ribonuclease activity	Gene Ontology	GO:0004540	1	21	0.0764054	0.148242	ZC3H12A	http://amigo.geneontology.org/amigo/term/GO:0004540
cellular response to tumor necrosis factor	Gene Ontology	GO:0071356	2	125	0.0771705	0.149478	ZC3H12A|CCL16	http://amigo.geneontology.org/amigo/term/GO:0071356
protein-containing complex	Gene Ontology	GO:0032991	5	623	0.0776679	0.150192	GOT2|ZC3H12A|GOT1|MAPK6|PLCB3	http://amigo.geneontology.org/amigo/term/GO:0032991
zinc ion binding	Gene Ontology	GO:0008270	6	820	0.079222	0.152427	VDR|TRIM29|DTX2|ALPP|ALPI|TRIM7	http://amigo.geneontology.org/amigo/term/GO:0008270
recycling endosome	Gene Ontology	GO:0055037	2	127	0.0792666	0.152427	APP|RAB25	http://amigo.geneontology.org/amigo/term/GO:0055037
negative regulation of mRNA splicing, via spliceosome	Gene Ontology	GO:0048025	1	22	0.0797372	0.152427	PTBP3	http://amigo.geneontology.org/amigo/term/GO:0048025
carbohydrate phosphorylation	Gene Ontology	GO:0046835	1	22	0.0797372	0.152427	HKDC1	http://amigo.geneontology.org/amigo/term/GO:0046835
regulation of phosphatidylinositol 3-kinase signaling	Gene Ontology	GO:0014066	1	22	0.0797372	0.152427	CEP55	http://amigo.geneontology.org/amigo/term/GO:0014066
apical junction complex	Gene Ontology	GO:0043296	1	22	0.0797372	0.152427	PVRL1	http://amigo.geneontology.org/amigo/term/GO:0043296
calcium ion homeostasis	Gene Ontology	GO:0055074	1	22	0.0797372	0.152427	VDR	http://amigo.geneontology.org/amigo/term/GO:0055074
protein phosphorylation	Gene Ontology	GO:0006468	4	451	0.0830021	0.154969	APP|STK24|MAPK6|PTK6	http://amigo.geneontology.org/amigo/term/GO:0006468
ionotropic glutamate receptor signaling pathway	Gene Ontology	GO:0035235	1	23	0.083057	0.154969	APP	http://amigo.geneontology.org/amigo/term/GO:0035235
regulation of mitotic nuclear division	Gene Ontology	GO:0007088	1	23	0.083057	0.154969	MKI67	http://amigo.geneontology.org/amigo/term/GO:0007088
exogenous drug catabolic process	Gene Ontology	GO:0042738	1	23	0.083057	0.154969	CYP2S1	http://amigo.geneontology.org/amigo/term/GO:0042738
negative regulation of intrinsic apoptotic signaling pathway	Gene Ontology	GO:2001243	1	23	0.083057	0.154969	PPIF	http://amigo.geneontology.org/amigo/term/GO:2001243
positive regulation of epidermal growth factor receptor signaling pathway	Gene Ontology	GO:0045742	1	23	0.083057	0.154969	PTK6	http://amigo.geneontology.org/amigo/term/GO:0045742
cell projection assembly	Gene Ontology	GO:0030031	1	23	0.083057	0.154969	RHOV	http://amigo.geneontology.org/amigo/term/GO:0030031
response to interferon-gamma	Gene Ontology	GO:0034341	1	23	0.083057	0.154969	VDR	http://amigo.geneontology.org/amigo/term/GO:0034341
extrinsic component of plasma membrane	Gene Ontology	GO:0019897	1	23	0.083057	0.154969	ST14	http://amigo.geneontology.org/amigo/term/GO:0019897
sperm capacitation	Gene Ontology	GO:0048240	1	23	0.083057	0.154969	CATSPER2	http://amigo.geneontology.org/amigo/term/GO:0048240
positive regulation of dendritic spine development	Gene Ontology	GO:0060999	1	23	0.083057	0.154969	MAPK6	http://amigo.geneontology.org/amigo/term/GO:0060999
peptidyl-L-cysteine S-palmitoylation	Gene Ontology	GO:0018230	1	23	0.083057	0.154969	ZDHHC3	http://amigo.geneontology.org/amigo/term/GO:0018230
positive regulation of long-term synaptic potentiation	Gene Ontology	GO:1900273	1	23	0.083057	0.154969	APP	http://amigo.geneontology.org/amigo/term/GO:1900273
anatomical structure morphogenesis	Gene Ontology	GO:0009653	2	131	0.0835117	0.155321	PTBP3|PITX1	http://amigo.geneontology.org/amigo/term/GO:0009653
nucleus organization	Gene Ontology	GO:0006997	1	24	0.0863649	0.157616	CEP55	http://amigo.geneontology.org/amigo/term/GO:0006997
cyclosporin A binding	Gene Ontology	GO:0016018	1	24	0.0863649	0.157616	PPIF	http://amigo.geneontology.org/amigo/term/GO:0016018
cellular response to fatty acid	Gene Ontology	GO:0071398	1	24	0.0863649	0.157616	NME2	http://amigo.geneontology.org/amigo/term/GO:0071398
actin-dependent ATPase activity	Gene Ontology	GO:0030898	1	24	0.0863649	0.157616	MYO1A	http://amigo.geneontology.org/amigo/term/GO:0030898
protein kinase A binding	Gene Ontology	GO:0051018	1	24	0.0863649	0.157616	GSKIP	http://amigo.geneontology.org/amigo/term/GO:0051018
-	Gene Ontology	GO:0042535	1	24	0.0863649	0.157616	APP	http://amigo.geneontology.org/amigo/term/GO:0042535
ATPase activator activity	Gene Ontology	GO:0001671	1	24	0.0863649	0.157616	ATP1B3	http://amigo.geneontology.org/amigo/term/GO:0001671
decidualization	Gene Ontology	GO:0046697	1	24	0.0863649	0.157616	VDR	http://amigo.geneontology.org/amigo/term/GO:0046697
negative regulation of NIK/NF-kappaB signaling	Gene Ontology	GO:1901223	1	24	0.0863649	0.157616	ZC3H12A	http://amigo.geneontology.org/amigo/term/GO:1901223
oxidoreductase activity, acting on the CH-OH group of donors, NAD or NADP as acceptor	Gene Ontology	GO:0016616	1	24	0.0863649	0.157616	HIBADH	http://amigo.geneontology.org/amigo/term/GO:0016616
intrinsic apoptotic signaling pathway by p53 class mediator	Gene Ontology	GO:0072332	1	24	0.0863649	0.157616	PERP	http://amigo.geneontology.org/amigo/term/GO:0072332
mitotic cell cycle	Gene Ontology	GO:0000278	2	134	0.0867404	0.158054	TUBA1C|TUBA4A	http://amigo.geneontology.org/amigo/term/GO:0000278
ubiquitin protein ligase activity	Gene Ontology	GO:0061630	3	286	0.0871649	0.15858	SH3RF2|DTX2|TRIM7	http://amigo.geneontology.org/amigo/term/GO:0061630
cell-cell contact zone	Gene Ontology	GO:0044291	1	25	0.0896609	0.161611	PVRL1	http://amigo.geneontology.org/amigo/term/GO:0044291
cellular amino acid biosynthetic process	Gene Ontology	GO:0008652	1	25	0.0896609	0.161611	GOT2	http://amigo.geneontology.org/amigo/term/GO:0008652
fatty acid binding	Gene Ontology	GO:0005504	1	25	0.0896609	0.161611	NME2	http://amigo.geneontology.org/amigo/term/GO:0005504
retinoic acid metabolic process	Gene Ontology	GO:0042573	1	25	0.0896609	0.161611	CYP2S1	http://amigo.geneontology.org/amigo/term/GO:0042573
ATP transmembrane transporter activity	Gene Ontology	GO:0005347	1	25	0.0896609	0.161611	SLC25A5	http://amigo.geneontology.org/amigo/term/GO:0005347
spindle midzone	Gene Ontology	GO:0051233	1	25	0.0896609	0.161611	APP	http://amigo.geneontology.org/amigo/term/GO:0051233
oxidoreductase activity	Gene Ontology	GO:0016491	2	137	0.0900061	0.161983	HR|CBLC	http://amigo.geneontology.org/amigo/term/GO:0016491
ATP biosynthetic process	Gene Ontology	GO:0006754	1	26	0.0929452	0.164734	LDHC	http://amigo.geneontology.org/amigo/term/GO:0006754
stress-activated MAPK cascade	Gene Ontology	GO:0051403	1	26	0.0929452	0.164734	MAPK13	http://amigo.geneontology.org/amigo/term/GO:0051403
protein catabolic process	Gene Ontology	GO:0030163	1	26	0.0929452	0.164734	UCHL3	http://amigo.geneontology.org/amigo/term/GO:0030163
response to morphine	Gene Ontology	GO:0043278	1	26	0.0929452	0.164734	GOT2	http://amigo.geneontology.org/amigo/term/GO:0043278
mRNA 3'-UTR AU-rich region binding	Gene Ontology	GO:0035925	1	26	0.0929452	0.164734	ZC3H12A	http://amigo.geneontology.org/amigo/term/GO:0035925
phosphatidylinositol phospholipase C activity	Gene Ontology	GO:0004435	1	26	0.0929452	0.164734	PLCB3	http://amigo.geneontology.org/amigo/term/GO:0004435
execution phase of apoptosis	Gene Ontology	GO:0097194	1	26	0.0929452	0.164734	STK24	http://amigo.geneontology.org/amigo/term/GO:0097194
positive regulation of phosphorylation	Gene Ontology	GO:0042327	1	26	0.0929452	0.164734	APP	http://amigo.geneontology.org/amigo/term/GO:0042327
protein kinase A regulatory subunit binding	Gene Ontology	GO:0034237	1	26	0.0929452	0.164734	GSKIP	http://amigo.geneontology.org/amigo/term/GO:0034237
positive regulation of p38MAPK cascade	Gene Ontology	GO:1900745	1	26	0.0929452	0.164734	ZC3H12A	http://amigo.geneontology.org/amigo/term/GO:1900745
transmembrane transport	Gene Ontology	GO:0055085	3	296	0.0941643	0.166642	GJB3|GJB5|SLC25A5	http://amigo.geneontology.org/amigo/term/GO:0055085
biomineral tissue development	Gene Ontology	GO:0031214	1	27	0.0962177	0.168237	FAM83H	http://amigo.geneontology.org/amigo/term/GO:0031214
pituitary gland development	Gene Ontology	GO:0021983	1	27	0.0962177	0.168237	PITX1	http://amigo.geneontology.org/amigo/term/GO:0021983
positive regulation of reactive oxygen species metabolic process	Gene Ontology	GO:2000379	1	27	0.0962177	0.168237	ZC3H12A	http://amigo.geneontology.org/amigo/term/GO:2000379
positive regulation of cell-matrix adhesion	Gene Ontology	GO:0001954	1	27	0.0962177	0.168237	FERMT1	http://amigo.geneontology.org/amigo/term/GO:0001954
smooth endoplasmic reticulum	Gene Ontology	GO:0005790	1	27	0.0962177	0.168237	APP	http://amigo.geneontology.org/amigo/term/GO:0005790
negative regulation of JNK cascade	Gene Ontology	GO:0046329	1	27	0.0962177	0.168237	SH3RF2	http://amigo.geneontology.org/amigo/term/GO:0046329
condensed chromosome	Gene Ontology	GO:0000793	1	27	0.0962177	0.168237	MKI67	http://amigo.geneontology.org/amigo/term/GO:0000793
positive regulation of G2/M transition of mitotic cell cycle	Gene Ontology	GO:0010971	1	27	0.0962177	0.168237	APP	http://amigo.geneontology.org/amigo/term/GO:0010971
positive regulation of canonical Wnt signaling pathway	Gene Ontology	GO:0090263	2	145	0.0988872	0.170614	GSKIP|NRARP	http://amigo.geneontology.org/amigo/term/GO:0090263
podosome	Gene Ontology	GO:0002102	1	28	0.0994784	0.170614	ARHGEF5	http://amigo.geneontology.org/amigo/term/GO:0002102
microfilament motor activity	Gene Ontology	GO:0000146	1	28	0.0994784	0.170614	MYO1A	http://amigo.geneontology.org/amigo/term/GO:0000146
homeostasis of number of cells within a tissue	Gene Ontology	GO:0048873	1	28	0.0994784	0.170614	FH	http://amigo.geneontology.org/amigo/term/GO:0048873
cellular response to virus	Gene Ontology	GO:0098586	1	28	0.0994784	0.170614	ZC3H12A	http://amigo.geneontology.org/amigo/term/GO:0098586
microglial cell activation	Gene Ontology	GO:0001774	1	28	0.0994784	0.170614	APP	http://amigo.geneontology.org/amigo/term/GO:0001774
positive regulation of release of cytochrome c from mitochondria	Gene Ontology	GO:0090200	1	28	0.0994784	0.170614	PPIF	http://amigo.geneontology.org/amigo/term/GO:0090200
defense response to fungus	Gene Ontology	GO:0050832	1	28	0.0994784	0.170614	GAPDH	http://amigo.geneontology.org/amigo/term/GO:0050832
ATP transport	Gene Ontology	GO:0015867	1	28	0.0994784	0.170614	SLC25A5	http://amigo.geneontology.org/amigo/term/GO:0015867
bile acid and bile salt transport	Gene Ontology	GO:0015721	1	28	0.0994784	0.170614	ATP8B1	http://amigo.geneontology.org/amigo/term/GO:0015721
negative regulation of interleukin-1 beta production	Gene Ontology	GO:0032691	1	28	0.0994784	0.170614	ZC3H12A	http://amigo.geneontology.org/amigo/term/GO:0032691
CCR chemokine receptor binding	Gene Ontology	GO:0048020	1	28	0.0994784	0.170614	CCL16	http://amigo.geneontology.org/amigo/term/GO:0048020
neurotransmitter transport	Gene Ontology	GO:0006836	1	28	0.0994784	0.170614	SLC6A8	http://amigo.geneontology.org/amigo/term/GO:0006836
DNA-binding transcription factor activity, RNA polymerase II-specific	Gene Ontology	GO:0000981	6	874	0.0996222	0.170614	VDR|IRF6|ETS2|KLF5|KLF3|PITX1	http://amigo.geneontology.org/amigo/term/GO:0000981
protein ubiquitination	Gene Ontology	GO:0016567	4	486	0.101835	0.17289	DTX2|ASB9|UCHL3|TRIM7	http://amigo.geneontology.org/amigo/term/GO:0016567
positive regulation of cytokine secretion	Gene Ontology	GO:0050715	1	29	0.102728	0.17289	GAPDH	http://amigo.geneontology.org/amigo/term/GO:0050715
cellular response to copper ion	Gene Ontology	GO:0071280	1	29	0.102728	0.17289	APP	http://amigo.geneontology.org/amigo/term/GO:0071280
embryonic hindlimb morphogenesis	Gene Ontology	GO:0035116	1	29	0.102728	0.17289	PITX1	http://amigo.geneontology.org/amigo/term/GO:0035116
regulation of transcription involved in G1/S transition of mitotic cell cycle	Gene Ontology	GO:0000083	1	29	0.102728	0.17289	RRM2	http://amigo.geneontology.org/amigo/term/GO:0000083
heterotypic cell-cell adhesion	Gene Ontology	GO:0034113	1	29	0.102728	0.17289	PERP	http://amigo.geneontology.org/amigo/term/GO:0034113
branching involved in blood vessel morphogenesis	Gene Ontology	GO:0001569	1	29	0.102728	0.17289	NRARP	http://amigo.geneontology.org/amigo/term/GO:0001569
regulation of Rho protein signal transduction	Gene Ontology	GO:0035023	1	29	0.102728	0.17289	EPS8L3	http://amigo.geneontology.org/amigo/term/GO:0035023
regulation of ERK1 and ERK2 cascade	Gene Ontology	GO:0070372	1	29	0.102728	0.17289	ARHGEF5	http://amigo.geneontology.org/amigo/term/GO:0070372
positive regulation of transforming growth factor beta receptor signaling pathway	Gene Ontology	GO:0030511	1	29	0.102728	0.17289	FERMT1	http://amigo.geneontology.org/amigo/term/GO:0030511
positive regulation of defense response to virus by host	Gene Ontology	GO:0002230	1	29	0.102728	0.17289	ZC3H12A	http://amigo.geneontology.org/amigo/term/GO:0002230
protein dephosphorylation	Gene Ontology	GO:0006470	2	149	0.103417	0.1738	PGAM5|CYCS	http://amigo.geneontology.org/amigo/term/GO:0006470
steroid hydroxylase activity	Gene Ontology	GO:0008395	1	30	0.105965	0.176558	CYP2S1	http://amigo.geneontology.org/amigo/term/GO:0008395
regulation of cytoskeleton organization	Gene Ontology	GO:0051493	1	30	0.105965	0.176558	ARHGEF5	http://amigo.geneontology.org/amigo/term/GO:0051493
positive regulation of peptidyl-threonine phosphorylation	Gene Ontology	GO:0010800	1	30	0.105965	0.176558	APP	http://amigo.geneontology.org/amigo/term/GO:0010800
negative regulation of insulin secretion	Gene Ontology	GO:0046676	1	30	0.105965	0.176558	PFKL	http://amigo.geneontology.org/amigo/term/GO:0046676
establishment of mitotic spindle orientation	Gene Ontology	GO:0000132	1	30	0.105965	0.176558	MISP	http://amigo.geneontology.org/amigo/term/GO:0000132
protein phosphatase 1 binding	Gene Ontology	GO:0008157	1	30	0.105965	0.176558	SH3RF2	http://amigo.geneontology.org/amigo/term/GO:0008157
positive regulation of mitotic cell cycle	Gene Ontology	GO:0045931	1	31	0.109191	0.180134	APP	http://amigo.geneontology.org/amigo/term/GO:0045931
FAD binding	Gene Ontology	GO:0071949	1	31	0.109191	0.180134	CBLC	http://amigo.geneontology.org/amigo/term/GO:0071949
protein kinase inhibitor activity	Gene Ontology	GO:0004860	1	31	0.109191	0.180134	GSKIP	http://amigo.geneontology.org/amigo/term/GO:0004860
ERBB2 signaling pathway	Gene Ontology	GO:0038128	1	31	0.109191	0.180134	PTK6	http://amigo.geneontology.org/amigo/term/GO:0038128
Flemming body	Gene Ontology	GO:0090543	1	31	0.109191	0.180134	CEP55	http://amigo.geneontology.org/amigo/term/GO:0090543
WW domain binding	Gene Ontology	GO:0050699	1	31	0.109191	0.180134	NDFIP2	http://amigo.geneontology.org/amigo/term/GO:0050699
perikaryon	Gene Ontology	GO:0043204	2	155	0.110316	0.181477	GOT2|APP	http://amigo.geneontology.org/amigo/term/GO:0043204
perinuclear region of cytoplasm	Gene Ontology	GO:0048471	5	697	0.110825	0.182059	NDFIP2|APP|NME2|GAPDH|RASEF	http://amigo.geneontology.org/amigo/term/GO:0048471
protein transport	Gene Ontology	GO:0015031	3	320	0.111859	0.183365	GOT1|RAB25|ECT2	http://amigo.geneontology.org/amigo/term/GO:0015031
regulation of presynapse assembly	Gene Ontology	GO:1905606	1	32	0.112405	0.183365	APP	http://amigo.geneontology.org/amigo/term/GO:1905606
plasma membrane raft	Gene Ontology	GO:0044853	1	32	0.112405	0.183365	MYO1A	http://amigo.geneontology.org/amigo/term/GO:0044853
cellular response to ionizing radiation	Gene Ontology	GO:0071479	1	32	0.112405	0.183365	ECT2	http://amigo.geneontology.org/amigo/term/GO:0071479
miRNA binding	Gene Ontology	GO:0035198	1	32	0.112405	0.183365	ZC3H12A	http://amigo.geneontology.org/amigo/term/GO:0035198
chemoattractant activity	Gene Ontology	GO:0042056	1	33	0.115608	0.187282	CCL16	http://amigo.geneontology.org/amigo/term/GO:0042056
response to interleukin-1	Gene Ontology	GO:0070555	1	33	0.115608	0.187282	APP	http://amigo.geneontology.org/amigo/term/GO:0070555
positive regulation of multicellular organism growth	Gene Ontology	GO:0040018	1	33	0.115608	0.187282	PLS1	http://amigo.geneontology.org/amigo/term/GO:0040018
endoribonuclease activity	Gene Ontology	GO:0004521	1	33	0.115608	0.187282	ZC3H12A	http://amigo.geneontology.org/amigo/term/GO:0004521
midbody	Gene Ontology	GO:0030496	2	160	0.116155	0.187907	CEP55|ECT2	http://amigo.geneontology.org/amigo/term/GO:0030496
nuclear chromatin	Gene Ontology	GO:0000790	6	915	0.116804	0.188696	VDR|IRF6|ETS2|KLF5|KLF3|PITX1	http://amigo.geneontology.org/amigo/term/GO:0000790
dendritic spine	Gene Ontology	GO:0043197	2	162	0.118512	0.188786	APP|ABHD17C	http://amigo.geneontology.org/amigo/term/GO:0043197
homophilic cell adhesion via plasma membrane adhesion molecules	Gene Ontology	GO:0007156	2	162	0.118512	0.188786	PVRL1|DSG3	http://amigo.geneontology.org/amigo/term/GO:0007156
positive regulation of JUN kinase activity	Gene Ontology	GO:0043507	1	34	0.118799	0.188786	ARHGEF5	http://amigo.geneontology.org/amigo/term/GO:0043507
stereocilium	Gene Ontology	GO:0032420	1	34	0.118799	0.188786	ATP8B1	http://amigo.geneontology.org/amigo/term/GO:0032420
sodium channel regulator activity	Gene Ontology	GO:0017080	1	34	0.118799	0.188786	TMPRSS4	http://amigo.geneontology.org/amigo/term/GO:0017080
regulation of cell differentiation	Gene Ontology	GO:0045595	1	34	0.118799	0.188786	PTBP3	http://amigo.geneontology.org/amigo/term/GO:0045595
filamentous actin	Gene Ontology	GO:0031941	1	34	0.118799	0.188786	MYO1A	http://amigo.geneontology.org/amigo/term/GO:0031941
epidermal growth factor receptor binding	Gene Ontology	GO:0005154	1	34	0.118799	0.188786	FAM83B	http://amigo.geneontology.org/amigo/term/GO:0005154
protein phosphatase inhibitor activity	Gene Ontology	GO:0004864	1	34	0.118799	0.188786	SH3RF2	http://amigo.geneontology.org/amigo/term/GO:0004864
hippocampal mossy fiber to CA3 synapse	Gene Ontology	GO:0098686	1	34	0.118799	0.188786	PVRL1	http://amigo.geneontology.org/amigo/term/GO:0098686
positive regulation of cell death	Gene Ontology	GO:0010942	1	34	0.118799	0.188786	ZC3H12A	http://amigo.geneontology.org/amigo/term/GO:0010942
myosin complex	Gene Ontology	GO:0016459	1	34	0.118799	0.188786	MYO1A	http://amigo.geneontology.org/amigo/term/GO:0016459
positive regulation of epithelial cell migration	Gene Ontology	GO:0010634	1	35	0.121979	0.191752	RAB25	http://amigo.geneontology.org/amigo/term/GO:0010634
killing of cells of other organism	Gene Ontology	GO:0031640	1	35	0.121979	0.191752	GAPDH	http://amigo.geneontology.org/amigo/term/GO:0031640
actin filament bundle assembly	Gene Ontology	GO:0051017	1	35	0.121979	0.191752	PLS1	http://amigo.geneontology.org/amigo/term/GO:0051017
cellular response to nerve growth factor stimulus	Gene Ontology	GO:1990090	1	35	0.121979	0.191752	APP	http://amigo.geneontology.org/amigo/term/GO:1990090
transport	Gene Ontology	GO:0006810	1	35	0.121979	0.191752	SLC6A8	http://amigo.geneontology.org/amigo/term/GO:0006810
positive regulation of cell cycle	Gene Ontology	GO:0045787	1	35	0.121979	0.191752	PTK6	http://amigo.geneontology.org/amigo/term/GO:0045787
RNA phosphodiester bond hydrolysis, exonucleolytic	Gene Ontology	GO:0090503	1	35	0.121979	0.191752	ZC3H12A	http://amigo.geneontology.org/amigo/term/GO:0090503
actin cytoskeleton organization	Gene Ontology	GO:0030036	2	166	0.123263	0.193509	ARHGEF5|POF1B	http://amigo.geneontology.org/amigo/term/GO:0030036
positive regulation of apoptotic process	Gene Ontology	GO:0043065	3	335	0.123516	0.193647	ARHGEF5|LDHA|ECT2	http://amigo.geneontology.org/amigo/term/GO:0043065
disordered domain specific binding	Gene Ontology	GO:0097718	1	36	0.125147	0.19412	GAPDH	http://amigo.geneontology.org/amigo/term/GO:0097718
immune system process	Gene Ontology	GO:0002376	1	36	0.125147	0.19412	IRF6	http://amigo.geneontology.org/amigo/term/GO:0002376
mRNA polyadenylation	Gene Ontology	GO:0006378	1	36	0.125147	0.19412	APP	http://amigo.geneontology.org/amigo/term/GO:0006378
monooxygenase activity	Gene Ontology	GO:0004497	1	36	0.125147	0.19412	CYP2S1	http://amigo.geneontology.org/amigo/term/GO:0004497
negative regulation of interferon-gamma production	Gene Ontology	GO:0032689	1	36	0.125147	0.19412	ZC3H12A	http://amigo.geneontology.org/amigo/term/GO:0032689
peptidyl-tyrosine autophosphorylation	Gene Ontology	GO:0038083	1	36	0.125147	0.19412	PTK6	http://amigo.geneontology.org/amigo/term/GO:0038083
structural molecule activity	Gene Ontology	GO:0005198	2	168	0.125655	0.194649	TUBA1C|LAD1	http://amigo.geneontology.org/amigo/term/GO:0005198
regulation of cell population proliferation	Gene Ontology	GO:0042127	2	169	0.126856	0.196248	FUT3|PTK6	http://amigo.geneontology.org/amigo/term/GO:0042127
Wnt signaling pathway, calcium modulating pathway	Gene Ontology	GO:0007223	1	37	0.128305	0.197184	PLCB3	http://amigo.geneontology.org/amigo/term/GO:0007223
intrinsic component of plasma membrane	Gene Ontology	GO:0031226	1	37	0.128305	0.197184	GGT5	http://amigo.geneontology.org/amigo/term/GO:0031226
placenta development	Gene Ontology	GO:0001890	1	37	0.128305	0.197184	GJB3	http://amigo.geneontology.org/amigo/term/GO:0001890
post-translational protein modification	Gene Ontology	GO:0043687	3	342	0.129103	0.19815	APP|ASB9|UCHL3	http://amigo.geneontology.org/amigo/term/GO:0043687
carbohydrate binding	Gene Ontology	GO:0030246	2	172	0.130473	0.199991	PVRL1|AIM1L	http://amigo.geneontology.org/amigo/term/GO:0030246
positive regulation of cytokinesis	Gene Ontology	GO:0032467	1	38	0.13145	0.200698	ECT2	http://amigo.geneontology.org/amigo/term/GO:0032467
negative regulation of Notch signaling pathway	Gene Ontology	GO:0045746	1	38	0.13145	0.200698	NRARP	http://amigo.geneontology.org/amigo/term/GO:0045746
dendritic shaft	Gene Ontology	GO:0043198	1	38	0.13145	0.200698	APP	http://amigo.geneontology.org/amigo/term/GO:0043198
cell division	Gene Ontology	GO:0051301	3	346	0.132335	0.201785	TUBA1C|REEP4|MISP	http://amigo.geneontology.org/amigo/term/GO:0051301
postsynaptic density membrane	Gene Ontology	GO:0098839	1	39	0.134585	0.203357	ABHD17C	http://amigo.geneontology.org/amigo/term/GO:0098839
negative regulation of signal transduction	Gene Ontology	GO:0009968	1	39	0.134585	0.203357	PTK6	http://amigo.geneontology.org/amigo/term/GO:0009968
phosphatidylinositol-3,4,5-trisphosphate binding	Gene Ontology	GO:0005547	1	39	0.134585	0.203357	ADAP1	http://amigo.geneontology.org/amigo/term/GO:0005547
fertilization	Gene Ontology	GO:0009566	1	39	0.134585	0.203357	CATSPER2	http://amigo.geneontology.org/amigo/term/GO:0009566
negative regulation of G0 to G1 transition	Gene Ontology	GO:0070317	1	39	0.134585	0.203357	RRM2	http://amigo.geneontology.org/amigo/term/GO:0070317
mitotic metaphase plate congression	Gene Ontology	GO:0007080	1	39	0.134585	0.203357	CEP55	http://amigo.geneontology.org/amigo/term/GO:0007080
presynaptic active zone	Gene Ontology	GO:0048786	1	39	0.134585	0.203357	APP	http://amigo.geneontology.org/amigo/term/GO:0048786
negative regulation of interleukin-6 production	Gene Ontology	GO:0032715	1	40	0.137708	0.206316	ZC3H12A	http://amigo.geneontology.org/amigo/term/GO:0032715
positive regulation of ATPase activity	Gene Ontology	GO:0032781	1	40	0.137708	0.206316	ATP1B3	http://amigo.geneontology.org/amigo/term/GO:0032781
COPII-coated ER to Golgi transport vesicle	Gene Ontology	GO:0030134	1	40	0.137708	0.206316	APP	http://amigo.geneontology.org/amigo/term/GO:0030134
positive regulation of interleukin-10 production	Gene Ontology	GO:0032733	1	40	0.137708	0.206316	C1orf106	http://amigo.geneontology.org/amigo/term/GO:0032733
positive regulation of pri-miRNA transcription by RNA polymerase II	Gene Ontology	GO:1902895	1	40	0.137708	0.206316	KLF5	http://amigo.geneontology.org/amigo/term/GO:1902895
establishment of protein localization	Gene Ontology	GO:0045184	1	40	0.137708	0.206316	CEP55	http://amigo.geneontology.org/amigo/term/GO:0045184
apical plasma membrane	Gene Ontology	GO:0016324	3	354	0.138884	0.207704	ATP8B1|PFKM|MYO1A	http://amigo.geneontology.org/amigo/term/GO:0016324
toxin transport	Gene Ontology	GO:1901998	1	41	0.14082	0.208729	RAB28	http://amigo.geneontology.org/amigo/term/GO:1901998
transferase activity	Gene Ontology	GO:0016740	1	41	0.14082	0.208729	CBLC	http://amigo.geneontology.org/amigo/term/GO:0016740
cellular response to amyloid-beta	Gene Ontology	GO:1904646	1	41	0.14082	0.208729	APP	http://amigo.geneontology.org/amigo/term/GO:1904646
response to cAMP	Gene Ontology	GO:0051591	1	41	0.14082	0.208729	LDHA	http://amigo.geneontology.org/amigo/term/GO:0051591
coreceptor activity	Gene Ontology	GO:0015026	1	41	0.14082	0.208729	PVRL1	http://amigo.geneontology.org/amigo/term/GO:0015026
mitotic spindle assembly	Gene Ontology	GO:0090307	1	41	0.14082	0.208729	MISP	http://amigo.geneontology.org/amigo/term/GO:0090307
adherens junction organization	Gene Ontology	GO:0034332	1	42	0.143921	0.211734	PVRL1	http://amigo.geneontology.org/amigo/term/GO:0034332
dendrite development	Gene Ontology	GO:0016358	1	42	0.143921	0.211734	APP	http://amigo.geneontology.org/amigo/term/GO:0016358
nuclear receptor activity	Gene Ontology	GO:0004879	1	42	0.143921	0.211734	VDR	http://amigo.geneontology.org/amigo/term/GO:0004879
response to progesterone	Gene Ontology	GO:0032570	1	42	0.143921	0.211734	CATSPER2	http://amigo.geneontology.org/amigo/term/GO:0032570
4 iron, 4 sulfur cluster binding	Gene Ontology	GO:0051539	1	42	0.143921	0.211734	ACO2	http://amigo.geneontology.org/amigo/term/GO:0051539
protein stabilization	Gene Ontology	GO:0050821	2	183	0.143936	0.211734	GAPDH|ATP1B3	http://amigo.geneontology.org/amigo/term/GO:0050821
lipid homeostasis	Gene Ontology	GO:0055088	1	43	0.147011	0.214368	VDR	http://amigo.geneontology.org/amigo/term/GO:0055088
regulation of RNA splicing	Gene Ontology	GO:0043484	1	43	0.147011	0.214368	PTBP3	http://amigo.geneontology.org/amigo/term/GO:0043484
monocyte chemotaxis	Gene Ontology	GO:0002548	1	43	0.147011	0.214368	CCL16	http://amigo.geneontology.org/amigo/term/GO:0002548
regulation of G protein-coupled receptor signaling pathway	Gene Ontology	GO:0008277	1	43	0.147011	0.214368	ZDHHC3	http://amigo.geneontology.org/amigo/term/GO:0008277
mitochondrial nucleoid	Gene Ontology	GO:0042645	1	43	0.147011	0.214368	SLC25A5	http://amigo.geneontology.org/amigo/term/GO:0042645
positive chemotaxis	Gene Ontology	GO:0050918	1	43	0.147011	0.214368	CCL16	http://amigo.geneontology.org/amigo/term/GO:0050918
potassium ion import across plasma membrane	Gene Ontology	GO:1990573	1	43	0.147011	0.214368	ATP1B3	http://amigo.geneontology.org/amigo/term/GO:1990573
histone deacetylase complex	Gene Ontology	GO:0000118	1	44	0.15009	0.218041	HR	http://amigo.geneontology.org/amigo/term/GO:0000118
neuromuscular process controlling balance	Gene Ontology	GO:0050885	1	44	0.15009	0.218041	APP	http://amigo.geneontology.org/amigo/term/GO:0050885
DNA binding	Gene Ontology	GO:0003677	7	1209	0.150883	0.218921	MKI67|VDR|IRF6|NME2|APP|ETS2|ZC3H12A	http://amigo.geneontology.org/amigo/term/GO:0003677
cellular response to organic cyclic compound	Gene Ontology	GO:0071407	1	45	0.153158	0.220577	KLF5	http://amigo.geneontology.org/amigo/term/GO:0071407
negative regulation of I-kappaB kinase/NF-kappaB signaling	Gene Ontology	GO:0043124	1	45	0.153158	0.220577	ZC3H12A	http://amigo.geneontology.org/amigo/term/GO:0043124
bone mineralization	Gene Ontology	GO:0030282	1	45	0.153158	0.220577	VDR	http://amigo.geneontology.org/amigo/term/GO:0030282
T-tubule	Gene Ontology	GO:0030315	1	45	0.153158	0.220577	GOT2	http://amigo.geneontology.org/amigo/term/GO:0030315
scavenger receptor activity	Gene Ontology	GO:0005044	1	45	0.153158	0.220577	TMPRSS4	http://amigo.geneontology.org/amigo/term/GO:0005044
peptidyl-prolyl cis-trans isomerase activity	Gene Ontology	GO:0003755	1	46	0.156214	0.223327	PPIF	http://amigo.geneontology.org/amigo/term/GO:0003755
voltage-gated ion channel activity	Gene Ontology	GO:0005244	1	46	0.156214	0.223327	CATSPER2	http://amigo.geneontology.org/amigo/term/GO:0005244
forebrain development	Gene Ontology	GO:0030900	1	46	0.156214	0.223327	APP	http://amigo.geneontology.org/amigo/term/GO:0030900
non-membrane spanning protein tyrosine kinase activity	Gene Ontology	GO:0004715	1	46	0.156214	0.223327	PTK6	http://amigo.geneontology.org/amigo/term/GO:0004715
protein peptidyl-prolyl isomerization	Gene Ontology	GO:0000413	1	46	0.156214	0.223327	PPIF	http://amigo.geneontology.org/amigo/term/GO:0000413
JNK cascade	Gene Ontology	GO:0007254	1	47	0.15926	0.226572	SH2D3A	http://amigo.geneontology.org/amigo/term/GO:0007254
negative regulation of cold-induced thermogenesis	Gene Ontology	GO:0120163	1	47	0.15926	0.226572	PGAM5	http://amigo.geneontology.org/amigo/term/GO:0120163
heterophilic cell-cell adhesion via plasma membrane cell adhesion molecules	Gene Ontology	GO:0007157	1	47	0.15926	0.226572	PVRL1	http://amigo.geneontology.org/amigo/term/GO:0007157
visual learning	Gene Ontology	GO:0008542	1	47	0.15926	0.226572	APP	http://amigo.geneontology.org/amigo/term/GO:0008542
regulation of apoptotic process	Gene Ontology	GO:0042981	2	197	0.161463	0.228662	PERP|NME2	http://amigo.geneontology.org/amigo/term/GO:0042981
inflammatory response	Gene Ontology	GO:0006954	3	381	0.161757	0.228662	ZC3H12A|CCL16|GGT5	http://amigo.geneontology.org/amigo/term/GO:0006954
generation of precursor metabolites and energy	Gene Ontology	GO:0006091	1	48	0.162295	0.228662	ACO2	http://amigo.geneontology.org/amigo/term/GO:0006091
cellular response to glucose starvation	Gene Ontology	GO:0042149	1	48	0.162295	0.228662	ZC3H12A	http://amigo.geneontology.org/amigo/term/GO:0042149
adult locomotory behavior	Gene Ontology	GO:0008344	1	48	0.162295	0.228662	APP	http://amigo.geneontology.org/amigo/term/GO:0008344
mRNA binding	Gene Ontology	GO:0003729	2	200	0.165269	0.231526	PTBP3|ZC3H12A	http://amigo.geneontology.org/amigo/term/GO:0003729
calmodulin binding	Gene Ontology	GO:0005516	2	200	0.165269	0.231526	PLCB3|MYO1A	http://amigo.geneontology.org/amigo/term/GO:0005516
phosphatase binding	Gene Ontology	GO:0019902	1	49	0.165319	0.231526	SH3RF2	http://amigo.geneontology.org/amigo/term/GO:0019902
negative regulation of tumor necrosis factor production	Gene Ontology	GO:0032720	1	49	0.165319	0.231526	ZC3H12A	http://amigo.geneontology.org/amigo/term/GO:0032720
regulation of cell adhesion	Gene Ontology	GO:0030155	1	49	0.165319	0.231526	FUT2	http://amigo.geneontology.org/amigo/term/GO:0030155
cognition	Gene Ontology	GO:0050890	1	50	0.168332	0.23462	APP	http://amigo.geneontology.org/amigo/term/GO:0050890
negative regulation of phosphatase activity	Gene Ontology	GO:0010923	1	50	0.168332	0.23462	SH3RF2	http://amigo.geneontology.org/amigo/term/GO:0010923
epidermal growth factor receptor signaling pathway	Gene Ontology	GO:0007173	1	50	0.168332	0.23462	FAM83B	http://amigo.geneontology.org/amigo/term/GO:0007173
negative regulation of phosphoprotein phosphatase activity	Gene Ontology	GO:0032515	1	51	0.171334	0.23767	SH3RF2	http://amigo.geneontology.org/amigo/term/GO:0032515
cellular response to UV	Gene Ontology	GO:0034644	1	51	0.171334	0.23767	MAPK13	http://amigo.geneontology.org/amigo/term/GO:0034644
synapse organization	Gene Ontology	GO:0050808	1	51	0.171334	0.23767	APP	http://amigo.geneontology.org/amigo/term/GO:0050808
methyltransferase activity	Gene Ontology	GO:0008168	1	51	0.171334	0.23767	GAMT	http://amigo.geneontology.org/amigo/term/GO:0008168
cell differentiation	Gene Ontology	GO:0030154	4	596	0.171907	0.238182	ETS2|ZC3H12A|VDR|PTK6	http://amigo.geneontology.org/amigo/term/GO:0030154
negative regulation of cell population proliferation	Gene Ontology	GO:0008285	3	394	0.173154	0.239626	APP|VDR|IRF6	http://amigo.geneontology.org/amigo/term/GO:0008285
positive regulation of ERK1 and ERK2 cascade	Gene Ontology	GO:0070374	2	207	0.174209	0.240109	APP|CCL16	http://amigo.geneontology.org/amigo/term/GO:0070374
positive regulation of stress fiber assembly	Gene Ontology	GO:0051496	1	52	0.174326	0.240109	ARHGEF5	http://amigo.geneontology.org/amigo/term/GO:0051496
serine-type peptidase activity	Gene Ontology	GO:0008236	1	52	0.174326	0.240109	ST14	http://amigo.geneontology.org/amigo/term/GO:0008236
ribosome binding	Gene Ontology	GO:0043022	1	52	0.174326	0.240109	ZC3H12A	http://amigo.geneontology.org/amigo/term/GO:0043022
ion transmembrane transport	Gene Ontology	GO:0034220	2	209	0.176778	0.241933	ATP8B1|ATP1B3	http://amigo.geneontology.org/amigo/term/GO:0034220
negative regulation of protein ubiquitination	Gene Ontology	GO:0031397	1	53	0.177307	0.241933	SH3RF2	http://amigo.geneontology.org/amigo/term/GO:0031397
regulation of cardiac conduction	Gene Ontology	GO:1903779	1	53	0.177307	0.241933	ATP1B3	http://amigo.geneontology.org/amigo/term/GO:1903779
regulation of catalytic activity	Gene Ontology	GO:0050790	1	53	0.177307	0.241933	CAPN1	http://amigo.geneontology.org/amigo/term/GO:0050790
protein targeting to membrane	Gene Ontology	GO:0006612	1	53	0.177307	0.241933	ZDHHC3	http://amigo.geneontology.org/amigo/term/GO:0006612
cellular response to cAMP	Gene Ontology	GO:0071320	1	53	0.177307	0.241933	APP	http://amigo.geneontology.org/amigo/term/GO:0071320
-	Gene Ontology	GO:0036459	1	53	0.177307	0.241933	UCHL3	http://amigo.geneontology.org/amigo/term/GO:0036459
cytoskeletal protein binding	Gene Ontology	GO:0008092	1	54	0.180277	0.244273	ALDOC	http://amigo.geneontology.org/amigo/term/GO:0008092
positive regulation of cysteine-type endopeptidase activity involved in apoptotic process	Gene Ontology	GO:0043280	1	54	0.180277	0.244273	CYCS	http://amigo.geneontology.org/amigo/term/GO:0043280
transmembrane receptor protein tyrosine kinase activity	Gene Ontology	GO:0004714	1	54	0.180277	0.244273	MST1R	http://amigo.geneontology.org/amigo/term/GO:0004714
response to ischemia	Gene Ontology	GO:0002931	1	54	0.180277	0.244273	PPIF	http://amigo.geneontology.org/amigo/term/GO:0002931
calcium channel activity	Gene Ontology	GO:0005262	1	54	0.180277	0.244273	CATSPER2	http://amigo.geneontology.org/amigo/term/GO:0005262
sequence-specific DNA binding	Gene Ontology	GO:0043565	3	405	0.182972	0.246	PITX1|IRF6|OVOL1	http://amigo.geneontology.org/amigo/term/GO:0043565
tertiary granule lumen	Gene Ontology	GO:1904724	1	55	0.183236	0.246	ALDOC	http://amigo.geneontology.org/amigo/term/GO:1904724
phosphatidylinositol-mediated signaling	Gene Ontology	GO:0048015	1	55	0.183236	0.246	PLCB3	http://amigo.geneontology.org/amigo/term/GO:0048015
positive regulation of endothelial cell migration	Gene Ontology	GO:0010595	1	55	0.183236	0.246	ZC3H12A	http://amigo.geneontology.org/amigo/term/GO:0010595
positive regulation of protein localization to plasma membrane	Gene Ontology	GO:1903078	1	55	0.183236	0.246	PLS1	http://amigo.geneontology.org/amigo/term/GO:1903078
response to calcium ion	Gene Ontology	GO:0051592	1	55	0.183236	0.246	S100A16	http://amigo.geneontology.org/amigo/term/GO:0051592
basolateral plasma membrane	Gene Ontology	GO:0016323	2	216	0.185815	0.248531	ST14|MYO1A	http://amigo.geneontology.org/amigo/term/GO:0016323
retina development in camera-type eye	Gene Ontology	GO:0060041	1	56	0.186185	0.248531	PVRL1	http://amigo.geneontology.org/amigo/term/GO:0060041
RNA polymerase II transcription factor binding	Gene Ontology	GO:0001085	1	56	0.186185	0.248531	PITX1	http://amigo.geneontology.org/amigo/term/GO:0001085
phosphatase activity	Gene Ontology	GO:0016791	1	56	0.186185	0.248531	PGAM5	http://amigo.geneontology.org/amigo/term/GO:0016791
Rho protein signal transduction	Gene Ontology	GO:0007266	1	56	0.186185	0.248531	EPS8L3	http://amigo.geneontology.org/amigo/term/GO:0007266
endosome membrane	Gene Ontology	GO:0010008	2	220	0.191008	0.254387	ABHD17C|RHOV	http://amigo.geneontology.org/amigo/term/GO:0010008
DNA helicase activity	Gene Ontology	GO:0003678	1	58	0.192051	0.254615	DQX1	http://amigo.geneontology.org/amigo/term/GO:0003678
clathrin-coated pit	Gene Ontology	GO:0005905	1	58	0.192051	0.254615	APP	http://amigo.geneontology.org/amigo/term/GO:0005905
positive regulation of autophagy	Gene Ontology	GO:0010508	1	58	0.192051	0.254615	ZC3H12A	http://amigo.geneontology.org/amigo/term/GO:0010508
brush border membrane	Gene Ontology	GO:0031526	1	58	0.192051	0.254615	ATP8B1	http://amigo.geneontology.org/amigo/term/GO:0031526
positive regulation of epithelial cell proliferation	Gene Ontology	GO:0050679	1	59	0.194969	0.257606	NME2	http://amigo.geneontology.org/amigo/term/GO:0050679
negative regulation of neuron differentiation	Gene Ontology	GO:0045665	1	59	0.194969	0.257606	APP	http://amigo.geneontology.org/amigo/term/GO:0045665
learning	Gene Ontology	GO:0007612	1	60	0.197876	0.258522	APP	http://amigo.geneontology.org/amigo/term/GO:0007612
methylation	Gene Ontology	GO:0032259	1	60	0.197876	0.258522	GAMT	http://amigo.geneontology.org/amigo/term/GO:0032259
sperm flagellum	Gene Ontology	GO:0036126	1	60	0.197876	0.258522	ATP1B3	http://amigo.geneontology.org/amigo/term/GO:0036126
phagocytosis	Gene Ontology	GO:0006909	1	60	0.197876	0.258522	MST1R	http://amigo.geneontology.org/amigo/term/GO:0006909
cartilage development	Gene Ontology	GO:0051216	1	60	0.197876	0.258522	PITX1	http://amigo.geneontology.org/amigo/term/GO:0051216
nucleotide binding	Gene Ontology	GO:0000166	1	60	0.197876	0.258522	PYGM	http://amigo.geneontology.org/amigo/term/GO:0000166
cellular response to glucose stimulus	Gene Ontology	GO:0071333	1	60	0.197876	0.258522	NME2	http://amigo.geneontology.org/amigo/term/GO:0071333
cytoplasmic microtubule	Gene Ontology	GO:0005881	1	60	0.197876	0.258522	REEP4	http://amigo.geneontology.org/amigo/term/GO:0005881
transcription regulator complex	Gene Ontology	GO:0005667	2	226	0.198834	0.259484	KLF5|PITX1	http://amigo.geneontology.org/amigo/term/GO:0005667
positive regulation of cell migration	Gene Ontology	GO:0030335	2	227	0.200143	0.260268	FAM83H|SH3RF2	http://amigo.geneontology.org/amigo/term/GO:0030335
RNA polymerase II transcription regulator complex	Gene Ontology	GO:0090575	1	61	0.200772	0.260268	VDR	http://amigo.geneontology.org/amigo/term/GO:0090575
positive regulation of MAP kinase activity	Gene Ontology	GO:0043406	1	61	0.200772	0.260268	MST1R	http://amigo.geneontology.org/amigo/term/GO:0043406
ficolin-1-rich granule membrane	Gene Ontology	GO:0101003	1	61	0.200772	0.260268	PKP1	http://amigo.geneontology.org/amigo/term/GO:0101003
lipid transport	Gene Ontology	GO:0006869	1	61	0.200772	0.260268	NME4	http://amigo.geneontology.org/amigo/term/GO:0006869
response to wounding	Gene Ontology	GO:0009611	1	61	0.200772	0.260268	TMPRSS4	http://amigo.geneontology.org/amigo/term/GO:0009611
single fertilization	Gene Ontology	GO:0007338	1	62	0.203658	0.263425	MST1R	http://amigo.geneontology.org/amigo/term/GO:0007338
antimicrobial humoral immune response mediated by antimicrobial peptide	Gene Ontology	GO:0061844	1	62	0.203658	0.263425	GAPDH	http://amigo.geneontology.org/amigo/term/GO:0061844
fatty acid metabolic process	Gene Ontology	GO:0006631	1	64	0.209399	0.269954	GGT5	http://amigo.geneontology.org/amigo/term/GO:0006631
extrinsic component of cytoplasmic side of plasma membrane	Gene Ontology	GO:0031234	1	65	0.212254	0.272133	PTK6	http://amigo.geneontology.org/amigo/term/GO:0031234
response to insulin	Gene Ontology	GO:0032868	1	65	0.212254	0.272133	GOT2	http://amigo.geneontology.org/amigo/term/GO:0032868
lateral plasma membrane	Gene Ontology	GO:0016328	1	65	0.212254	0.272133	MYO1A	http://amigo.geneontology.org/amigo/term/GO:0016328
angiogenesis	Gene Ontology	GO:0001525	2	238	0.214597	0.273082	ZC3H12A|KLF5	http://amigo.geneontology.org/amigo/term/GO:0001525
activation of protein kinase activity	Gene Ontology	GO:0032147	1	66	0.215099	0.273082	ECT2	http://amigo.geneontology.org/amigo/term/GO:0032147
extracellular matrix disassembly	Gene Ontology	GO:0022617	1	66	0.215099	0.273082	CAPN1	http://amigo.geneontology.org/amigo/term/GO:0022617
positive regulation of NIK/NF-kappaB signaling	Gene Ontology	GO:1901224	1	66	0.215099	0.273082	APP	http://amigo.geneontology.org/amigo/term/GO:1901224
type I interferon signaling pathway	Gene Ontology	GO:0060337	1	66	0.215099	0.273082	IRF6	http://amigo.geneontology.org/amigo/term/GO:0060337
chromatin DNA binding	Gene Ontology	GO:0031490	1	66	0.215099	0.273082	HR	http://amigo.geneontology.org/amigo/term/GO:0031490
platelet alpha granule lumen	Gene Ontology	GO:0031093	1	66	0.215099	0.273082	APP	http://amigo.geneontology.org/amigo/term/GO:0031093
p53 binding	Gene Ontology	GO:0002039	1	66	0.215099	0.273082	TRIM29	http://amigo.geneontology.org/amigo/term/GO:0002039
roof of mouth development	Gene Ontology	GO:0060021	1	66	0.215099	0.273082	IRF6	http://amigo.geneontology.org/amigo/term/GO:0060021
chemokine-mediated signaling pathway	Gene Ontology	GO:0070098	1	67	0.217934	0.275782	CCL16	http://amigo.geneontology.org/amigo/term/GO:0070098
positive regulation of tyrosine phosphorylation of STAT protein	Gene Ontology	GO:0042531	1	68	0.220758	0.277851	PTK6	http://amigo.geneontology.org/amigo/term/GO:0042531
epithelial cell differentiation	Gene Ontology	GO:0030855	1	68	0.220758	0.277851	ALDOC	http://amigo.geneontology.org/amigo/term/GO:0030855
response to nutrient	Gene Ontology	GO:0007584	1	68	0.220758	0.277851	LDHA	http://amigo.geneontology.org/amigo/term/GO:0007584
protein autoubiquitination	Gene Ontology	GO:0051865	1	69	0.223573	0.280486	SH3RF2	http://amigo.geneontology.org/amigo/term/GO:0051865
stress fiber	Gene Ontology	GO:0001725	1	69	0.223573	0.280486	MST1R	http://amigo.geneontology.org/amigo/term/GO:0001725
actin cytoskeleton	Gene Ontology	GO:0015629	2	245	0.223846	0.280528	LAD1|MYO1A	http://amigo.geneontology.org/amigo/term/GO:0015629
positive regulation of protein binding	Gene Ontology	GO:0032092	1	70	0.226377	0.282487	APP	http://amigo.geneontology.org/amigo/term/GO:0032092
G protein-coupled receptor signaling pathway	Gene Ontology	GO:0007186	6	1132	0.228745	0.284455	PLCB3|CCL16|ECT2|APP|ARHGEF5|RAPGEFL1	http://amigo.geneontology.org/amigo/term/GO:0007186
negative regulation of protein phosphorylation	Gene Ontology	GO:0001933	1	71	0.229171	0.284455	ZC3H12A	http://amigo.geneontology.org/amigo/term/GO:0001933
regulation of insulin secretion	Gene Ontology	GO:0050796	1	71	0.229171	0.284455	SLC25A5	http://amigo.geneontology.org/amigo/term/GO:0050796
intercellular bridge	Gene Ontology	GO:0045171	1	71	0.229171	0.284455	CEP55	http://amigo.geneontology.org/amigo/term/GO:0045171
interferon-gamma-mediated signaling pathway	Gene Ontology	GO:0060333	1	71	0.229171	0.284455	IRF6	http://amigo.geneontology.org/amigo/term/GO:0060333
chromosome segregation	Gene Ontology	GO:0007059	1	72	0.231955	0.286086	SLC25A5	http://amigo.geneontology.org/amigo/term/GO:0007059
RNA phosphodiester bond hydrolysis, endonucleolytic	Gene Ontology	GO:0090502	1	72	0.231955	0.286086	ZC3H12A	http://amigo.geneontology.org/amigo/term/GO:0090502
positive regulation of kinase activity	Gene Ontology	GO:0033674	1	72	0.231955	0.286086	MST1R	http://amigo.geneontology.org/amigo/term/GO:0033674
cellular response to starvation	Gene Ontology	GO:0009267	1	72	0.231955	0.286086	STK24	http://amigo.geneontology.org/amigo/term/GO:0009267
microtubule binding	Gene Ontology	GO:0008017	2	252	0.233126	0.286924	GAPDH|REEP4	http://amigo.geneontology.org/amigo/term/GO:0008017
extracellular matrix organization	Gene Ontology	GO:0030198	2	252	0.233126	0.286924	APP|SERPINB5	http://amigo.geneontology.org/amigo/term/GO:0030198
DNA-binding transcription repressor activity, RNA polymerase II-specific	Gene Ontology	GO:0001227	2	253	0.234454	0.287076	ETS2|OVOL1	http://amigo.geneontology.org/amigo/term/GO:0001227
mRNA 3'-UTR binding	Gene Ontology	GO:0003730	1	73	0.234729	0.287076	ZC3H12A	http://amigo.geneontology.org/amigo/term/GO:0003730
positive regulation of endothelial cell proliferation	Gene Ontology	GO:0001938	1	73	0.234729	0.287076	NRARP	http://amigo.geneontology.org/amigo/term/GO:0001938
positive regulation of protein catabolic process	Gene Ontology	GO:0045732	1	73	0.234729	0.287076	ASB9	http://amigo.geneontology.org/amigo/term/GO:0045732
DNA duplex unwinding	Gene Ontology	GO:0032508	1	73	0.234729	0.287076	DQX1	http://amigo.geneontology.org/amigo/term/GO:0032508
integral component of plasma membrane	Gene Ontology	GO:0005887	7	1380	0.23497	0.287076	APP|SLC6A8|MST1R|ST14|SLC25A5|ATP8B1|PERP	http://amigo.geneontology.org/amigo/term/GO:0005887
positive regulation of proteasomal ubiquitin-dependent protein catabolic process	Gene Ontology	GO:0032436	1	74	0.237494	0.288951	SH3RF2	http://amigo.geneontology.org/amigo/term/GO:0032436
apical part of cell	Gene Ontology	GO:0045177	1	74	0.237494	0.288951	APP	http://amigo.geneontology.org/amigo/term/GO:0045177
defense response	Gene Ontology	GO:0006952	1	74	0.237494	0.288951	MST1R	http://amigo.geneontology.org/amigo/term/GO:0006952
DNA-binding transcription activator activity, RNA polymerase II-specific	Gene Ontology	GO:0001228	3	466	0.239731	0.290787	KLF5|PITX1|OVOL1	http://amigo.geneontology.org/amigo/term/GO:0001228
cholesterol metabolic process	Gene Ontology	GO:0008203	1	75	0.240248	0.290787	APP	http://amigo.geneontology.org/amigo/term/GO:0008203
regulation of actin cytoskeleton organization	Gene Ontology	GO:0032956	1	75	0.240248	0.290787	ARHGEF5	http://amigo.geneontology.org/amigo/term/GO:0032956
negative regulation of protein kinase activity	Gene Ontology	GO:0006469	1	75	0.240248	0.290787	GSKIP	http://amigo.geneontology.org/amigo/term/GO:0006469
calcium ion transport	Gene Ontology	GO:0006816	1	75	0.240248	0.290787	VDR	http://amigo.geneontology.org/amigo/term/GO:0006816
caveola	Gene Ontology	GO:0005901	1	76	0.242993	0.292292	ATP1B3	http://amigo.geneontology.org/amigo/term/GO:0005901
liver development	Gene Ontology	GO:0001889	1	76	0.242993	0.292292	ACO2	http://amigo.geneontology.org/amigo/term/GO:0001889
neuromuscular junction	Gene Ontology	GO:0031594	1	76	0.242993	0.292292	APP	http://amigo.geneontology.org/amigo/term/GO:0031594
virus receptor activity	Gene Ontology	GO:0001618	1	76	0.242993	0.292292	PVRL1	http://amigo.geneontology.org/amigo/term/GO:0001618
cytoplasmic ribonucleoprotein granule	Gene Ontology	GO:0036464	1	77	0.245727	0.294974	ZC3H12A	http://amigo.geneontology.org/amigo/term/GO:0036464
sodium ion transport	Gene Ontology	GO:0006814	1	77	0.245727	0.294974	SLC6A8	http://amigo.geneontology.org/amigo/term/GO:0006814
protein deubiquitination	Gene Ontology	GO:0016579	2	262	0.246422	0.295201	ZC3H12A|UCHL3	http://amigo.geneontology.org/amigo/term/GO:0016579
lysosome	Gene Ontology	GO:0005764	2	262	0.246422	0.295201	TRIM29|CAPN1	http://amigo.geneontology.org/amigo/term/GO:0005764
axonogenesis	Gene Ontology	GO:0007409	1	78	0.248452	0.29672	APP	http://amigo.geneontology.org/amigo/term/GO:0007409
neural tube closure	Gene Ontology	GO:0001843	1	78	0.248452	0.29672	ST14	http://amigo.geneontology.org/amigo/term/GO:0001843
calcium-dependent protein binding	Gene Ontology	GO:0048306	1	78	0.248452	0.29672	S100A16	http://amigo.geneontology.org/amigo/term/GO:0048306
ubiquitin binding	Gene Ontology	GO:0043130	1	79	0.251167	0.299045	UCHL3	http://amigo.geneontology.org/amigo/term/GO:0043130
negative regulation of translation	Gene Ontology	GO:0017148	1	79	0.251167	0.299045	GAPDH	http://amigo.geneontology.org/amigo/term/GO:0017148
lipid catabolic process	Gene Ontology	GO:0016042	1	79	0.251167	0.299045	PLCB3	http://amigo.geneontology.org/amigo/term/GO:0016042
regulation of G2/M transition of mitotic cell cycle	Gene Ontology	GO:0010389	1	80	0.253872	0.301344	TUBA4A	http://amigo.geneontology.org/amigo/term/GO:0010389
negative regulation of NF-kappaB transcription factor activity	Gene Ontology	GO:0032088	1	80	0.253872	0.301344	ZC3H12A	http://amigo.geneontology.org/amigo/term/GO:0032088
epidermis development	Gene Ontology	GO:0008544	1	80	0.253872	0.301344	GJB5	http://amigo.geneontology.org/amigo/term/GO:0008544
positive regulation of inflammatory response	Gene Ontology	GO:0050729	1	81	0.256568	0.304235	MAPK13	http://amigo.geneontology.org/amigo/term/GO:0050729
positive regulation of neuron differentiation	Gene Ontology	GO:0045666	1	82	0.259254	0.307108	ECT2	http://amigo.geneontology.org/amigo/term/GO:0045666
negative regulation of apoptotic process	Gene Ontology	GO:0043066	3	487	0.259943	0.307612	PPIF|SH3RF2|NME2	http://amigo.geneontology.org/amigo/term/GO:0043066
phosphatidylinositol-4,5-bisphosphate binding	Gene Ontology	GO:0005546	1	83	0.26193	0.309337	SDCBP2	http://amigo.geneontology.org/amigo/term/GO:0005546
female pregnancy	Gene Ontology	GO:0007565	1	84	0.264597	0.311769	GOT2	http://amigo.geneontology.org/amigo/term/GO:0007565
cholesterol homeostasis	Gene Ontology	GO:0042632	1	84	0.264597	0.311769	VDR	http://amigo.geneontology.org/amigo/term/GO:0042632
BMP signaling pathway	Gene Ontology	GO:0030509	1	85	0.267254	0.313406	FAM83G	http://amigo.geneontology.org/amigo/term/GO:0030509
locomotory behavior	Gene Ontology	GO:0007626	1	85	0.267254	0.313406	APP	http://amigo.geneontology.org/amigo/term/GO:0007626
peptidase activity	Gene Ontology	GO:0008233	1	85	0.267254	0.313406	UCHL3	http://amigo.geneontology.org/amigo/term/GO:0008233
mitochondrial translational termination	Gene Ontology	GO:0070126	1	86	0.269901	0.315245	MRRF	http://amigo.geneontology.org/amigo/term/GO:0070126
beta-catenin binding	Gene Ontology	GO:0008013	1	86	0.269901	0.315245	GSKIP	http://amigo.geneontology.org/amigo/term/GO:0008013
recycling endosome membrane	Gene Ontology	GO:0055038	1	87	0.27254	0.318008	ABHD17C	http://amigo.geneontology.org/amigo/term/GO:0055038
ATPase binding	Gene Ontology	GO:0051117	1	88	0.275168	0.320435	ATP1B3	http://amigo.geneontology.org/amigo/term/GO:0051117
P-body	Gene Ontology	GO:0000932	1	88	0.275168	0.320435	ZC3H12A	http://amigo.geneontology.org/amigo/term/GO:0000932
protein tyrosine kinase activity	Gene Ontology	GO:0004713	1	89	0.277787	0.3222	PTK6	http://amigo.geneontology.org/amigo/term/GO:0004713
transcription coregulator activity	Gene Ontology	GO:0003712	1	89	0.277787	0.3222	HR	http://amigo.geneontology.org/amigo/term/GO:0003712
viral entry into host cell	Gene Ontology	GO:0046718	1	89	0.277787	0.3222	PVRL1	http://amigo.geneontology.org/amigo/term/GO:0046718
azurophil granule lumen	Gene Ontology	GO:0035578	1	90	0.280397	0.324583	PYGB	http://amigo.geneontology.org/amigo/term/GO:0035578
molecular_function	Gene Ontology	GO:0003674	4	742	0.282816	0.326622	ENO4|TMEM54|SLC6A8|GGT6	http://amigo.geneontology.org/amigo/term/GO:0003674
mitochondrion organization	Gene Ontology	GO:0007005	1	91	0.282998	0.326622	CYCS	http://amigo.geneontology.org/amigo/term/GO:0007005
xenobiotic metabolic process	Gene Ontology	GO:0006805	1	91	0.282998	0.326622	CYP2S1	http://amigo.geneontology.org/amigo/term/GO:0006805
secretory granule	Gene Ontology	GO:0030141	1	92	0.285589	0.328694	TMPRSS4	http://amigo.geneontology.org/amigo/term/GO:0030141
ubiquitin-dependent protein catabolic process	Gene Ontology	GO:0006511	2	292	0.286406	0.328694	NDFIP2|UCHL3	http://amigo.geneontology.org/amigo/term/GO:0006511
endosome	Gene Ontology	GO:0005768	2	293	0.287737	0.328694	APP|RAB25	http://amigo.geneontology.org/amigo/term/GO:0005768
lipid droplet	Gene Ontology	GO:0005811	1	93	0.28817	0.328694	GAPDH	http://amigo.geneontology.org/amigo/term/GO:0005811
exocytosis	Gene Ontology	GO:0006887	1	93	0.28817	0.328694	RAB25	http://amigo.geneontology.org/amigo/term/GO:0006887
trans-Golgi network membrane	Gene Ontology	GO:0032588	1	93	0.28817	0.328694	APP	http://amigo.geneontology.org/amigo/term/GO:0032588
keratin filament	Gene Ontology	GO:0045095	1	93	0.28817	0.328694	FAM83H	http://amigo.geneontology.org/amigo/term/GO:0045095
spliceosomal complex	Gene Ontology	GO:0005681	1	93	0.28817	0.328694	DQX1	http://amigo.geneontology.org/amigo/term/GO:0005681
macroautophagy	Gene Ontology	GO:0016236	1	93	0.28817	0.328694	PGAM5	http://amigo.geneontology.org/amigo/term/GO:0016236
basement membrane	Gene Ontology	GO:0005604	1	93	0.28817	0.328694	LAD1	http://amigo.geneontology.org/amigo/term/GO:0005604
ubiquitin protein ligase binding	Gene Ontology	GO:0031625	2	294	0.289069	0.329397	TPI1|SLC25A5	http://amigo.geneontology.org/amigo/term/GO:0031625
protein heterodimerization activity	Gene Ontology	GO:0046982	2	297	0.293061	0.332604	SDCBP2|MAPK6	http://amigo.geneontology.org/amigo/term/GO:0046982
kidney development	Gene Ontology	GO:0001822	1	95	0.293306	0.332604	OVOL1	http://amigo.geneontology.org/amigo/term/GO:0001822
centriolar satellite	Gene Ontology	GO:0034451	1	95	0.293306	0.332604	CEP55	http://amigo.geneontology.org/amigo/term/GO:0034451
ciliary basal body-plasma membrane docking	Gene Ontology	GO:0097711	1	95	0.293306	0.332604	TUBA4A	http://amigo.geneontology.org/amigo/term/GO:0097711
regulation of cell migration	Gene Ontology	GO:0030334	1	97	0.298405	0.337403	FUT3	http://amigo.geneontology.org/amigo/term/GO:0030334
cellular calcium ion homeostasis	Gene Ontology	GO:0006874	1	98	0.300941	0.339285	VDR	http://amigo.geneontology.org/amigo/term/GO:0006874
response to ethanol	Gene Ontology	GO:0045471	1	98	0.300941	0.339285	GOT2	http://amigo.geneontology.org/amigo/term/GO:0045471
melanosome	Gene Ontology	GO:0042470	1	99	0.303468	0.341069	ATP1B3	http://amigo.geneontology.org/amigo/term/GO:0042470
microtubule	Gene Ontology	GO:0005874	2	305	0.303691	0.341069	TUBA1C|TUBA4A	http://amigo.geneontology.org/amigo/term/GO:0005874
mitotic spindle	Gene Ontology	GO:0072686	1	100	0.305985	0.342986	ECT2	http://amigo.geneontology.org/amigo/term/GO:0072686
response to oxidative stress	Gene Ontology	GO:0006979	1	101	0.308494	0.344805	APP	http://amigo.geneontology.org/amigo/term/GO:0006979
Golgi lumen	Gene Ontology	GO:0005796	1	101	0.308494	0.344805	APP	http://amigo.geneontology.org/amigo/term/GO:0005796
response to virus	Gene Ontology	GO:0009615	1	104	0.315966	0.352145	MST1R	http://amigo.geneontology.org/amigo/term/GO:0009615
apoptotic process	Gene Ontology	GO:0006915	3	546	0.317669	0.353705	ZC3H12A|CYCS|NME3	http://amigo.geneontology.org/amigo/term/GO:0006915
protein homooligomerization	Gene Ontology	GO:0051260	1	105	0.318439	0.354225	ECT2	http://amigo.geneontology.org/amigo/term/GO:0051260
positive regulation of transcription, DNA-templated	Gene Ontology	GO:0045893	3	556	0.327514	0.363627	ETS2|IRF6|NME2	http://amigo.geneontology.org/amigo/term/GO:0045893
phospholipid binding	Gene Ontology	GO:0005543	1	109	0.328241	0.364089	GOT2	http://amigo.geneontology.org/amigo/term/GO:0005543
RNA polymerase II transcription regulatory region sequence-specific DNA binding	Gene Ontology	GO:0000977	2	327	0.332762	0.368754	KLF3|ZNF57	http://amigo.geneontology.org/amigo/term/GO:0000977
regulation of ion transmembrane transport	Gene Ontology	GO:0034765	1	113	0.337904	0.373036	CATSPER2	http://amigo.geneontology.org/amigo/term/GO:0034765
adenylate cyclase-activating G protein-coupled receptor signaling pathway	Gene Ontology	GO:0007189	1	113	0.337904	0.373036	NME2	http://amigo.geneontology.org/amigo/term/GO:0007189
response to bacterium	Gene Ontology	GO:0009617	1	115	0.342683	0.376179	PYGL	http://amigo.geneontology.org/amigo/term/GO:0009617
negative regulation of cell migration	Gene Ontology	GO:0030336	1	115	0.342683	0.376179	STK24	http://amigo.geneontology.org/amigo/term/GO:0030336
calcium ion transmembrane transport	Gene Ontology	GO:0070588	1	115	0.342683	0.376179	CATSPER2	http://amigo.geneontology.org/amigo/term/GO:0070588
glucose homeostasis	Gene Ontology	GO:0042593	1	115	0.342683	0.376179	PYGL	http://amigo.geneontology.org/amigo/term/GO:0042593
Golgi organization	Gene Ontology	GO:0007030	1	115	0.342683	0.376179	ATP8B1	http://amigo.geneontology.org/amigo/term/GO:0007030
extracellular space	Gene Ontology	GO:0005615	7	1572	0.343355	0.376562	CCL16|APP|TPI1|KLF5|ST14|SERPINB5|S100A16	http://amigo.geneontology.org/amigo/term/GO:0005615
neuron projection development	Gene Ontology	GO:0031175	1	116	0.34506	0.378077	APP	http://amigo.geneontology.org/amigo/term/GO:0031175
chemotaxis	Gene Ontology	GO:0006935	1	119	0.35214	0.385112	CCL16	http://amigo.geneontology.org/amigo/term/GO:0006935
spindle pole	Gene Ontology	GO:0000922	1	121	0.356817	0.389497	PLEKHG6	http://amigo.geneontology.org/amigo/term/GO:0000922
intracellular anatomical structure	Gene Ontology	GO:0005622	1	123	0.361461	0.392956	DQX1	http://amigo.geneontology.org/amigo/term/GO:0005622
activation of MAPK activity	Gene Ontology	GO:0000187	1	123	0.361461	0.392956	C1orf106	http://amigo.geneontology.org/amigo/term/GO:0000187
potassium ion transmembrane transport	Gene Ontology	GO:0071805	1	123	0.361461	0.392956	ATP1B3	http://amigo.geneontology.org/amigo/term/GO:0071805
protein-containing complex binding	Gene Ontology	GO:0044877	2	349	0.361487	0.392956	PVRL1|PGAM5	http://amigo.geneontology.org/amigo/term/GO:0044877
nucleolus	Gene Ontology	GO:0005730	4	839	0.361667	0.392956	MKI67|SDCBP2|STK24|S100A16	http://amigo.geneontology.org/amigo/term/GO:0005730
chromatin	Gene Ontology	GO:0000785	1	124	0.36377	0.394507	HR	http://amigo.geneontology.org/amigo/term/GO:0000785
peptidyl-tyrosine phosphorylation	Gene Ontology	GO:0018108	1	124	0.36377	0.394507	MST1R	http://amigo.geneontology.org/amigo/term/GO:0018108
biological_process	Gene Ontology	GO:0008150	3	594	0.364871	0.395333	ENO4|TMEM54|GGT6	http://amigo.geneontology.org/amigo/term/GO:0008150
negative regulation of cell growth	Gene Ontology	GO:0030308	1	125	0.366071	0.395899	VDR	http://amigo.geneontology.org/amigo/term/GO:0030308
endomembrane system	Gene Ontology	GO:0012505	1	125	0.366071	0.395899	RAB28	http://amigo.geneontology.org/amigo/term/GO:0012505
signaling receptor binding	Gene Ontology	GO:0005102	2	353	0.366663	0.396172	APP|PTK6	http://amigo.geneontology.org/amigo/term/GO:0005102
chromosome	Gene Ontology	GO:0005694	1	127	0.370649	0.39974	FH	http://amigo.geneontology.org/amigo/term/GO:0005694
cell projection	Gene Ontology	GO:0042995	1	127	0.370649	0.39974	ARHGEF5	http://amigo.geneontology.org/amigo/term/GO:0042995
cell cycle arrest	Gene Ontology	GO:0007050	1	130	0.377454	0.405954	IRF6	http://amigo.geneontology.org/amigo/term/GO:0007050
DNA replication	Gene Ontology	GO:0006260	1	131	0.379706	0.407625	RRM2	http://amigo.geneontology.org/amigo/term/GO:0006260
positive regulation of angiogenesis	Gene Ontology	GO:0045766	1	131	0.379706	0.407625	ZC3H12A	http://amigo.geneontology.org/amigo/term/GO:0045766
synaptic vesicle	Gene Ontology	GO:0008021	1	133	0.384185	0.410924	APP	http://amigo.geneontology.org/amigo/term/GO:0008021
G2/M transition of mitotic cell cycle	Gene Ontology	GO:0000086	1	133	0.384185	0.410924	TUBA4A	http://amigo.geneontology.org/amigo/term/GO:0000086
animal organ morphogenesis	Gene Ontology	GO:0009887	1	134	0.386413	0.412928	GAMT	http://amigo.geneontology.org/amigo/term/GO:0009887
lipid metabolic process	Gene Ontology	GO:0006629	1	140	0.399613	0.424702	VDR	http://amigo.geneontology.org/amigo/term/GO:0006629
integrin binding	Gene Ontology	GO:0005178	1	142	0.40395	0.428532	FERMT1	http://amigo.geneontology.org/amigo/term/GO:0005178
cell cortex	Gene Ontology	GO:0005938	1	142	0.40395	0.428532	ECT2	http://amigo.geneontology.org/amigo/term/GO:0005938
centriole	Gene Ontology	GO:0005814	1	144	0.408256	0.432707	CEP55	http://amigo.geneontology.org/amigo/term/GO:0005814
vesicle-mediated transport	Gene Ontology	GO:0016192	1	150	0.420989	0.444589	GOT1	http://amigo.geneontology.org/amigo/term/GO:0016192
ciliary basal body	Gene Ontology	GO:0036064	1	151	0.423084	0.445995	RAB28	http://amigo.geneontology.org/amigo/term/GO:0036064
lipid binding	Gene Ontology	GO:0008289	1	151	0.423084	0.445995	ARHGEF5	http://amigo.geneontology.org/amigo/term/GO:0008289
ribonucleoprotein complex	Gene Ontology	GO:1990904	1	156	0.43345	0.455688	GAPDH	http://amigo.geneontology.org/amigo/term/GO:1990904
mRNA processing	Gene Ontology	GO:0006397	1	158	0.437544	0.459166	PTBP3	http://amigo.geneontology.org/amigo/term/GO:0006397
cellular response to lipopolysaccharide	Gene Ontology	GO:0071222	1	158	0.437544	0.459166	ZC3H12A	http://amigo.geneontology.org/amigo/term/GO:0071222
positive regulation of NF-kappaB transcription factor activity	Gene Ontology	GO:0051092	1	159	0.43958	0.460888	APP	http://amigo.geneontology.org/amigo/term/GO:0051092
response to hypoxia	Gene Ontology	GO:0001666	1	160	0.441609	0.461359	LDHA	http://amigo.geneontology.org/amigo/term/GO:0001666
transcription initiation from RNA polymerase II promoter	Gene Ontology	GO:0006367	1	160	0.441609	0.461359	VDR	http://amigo.geneontology.org/amigo/term/GO:0006367
RNA splicing	Gene Ontology	GO:0008380	1	160	0.441609	0.461359	PTBP3	http://amigo.geneontology.org/amigo/term/GO:0008380
peptidyl-serine phosphorylation	Gene Ontology	GO:0018105	1	161	0.44363	0.463056	MAPK13	http://amigo.geneontology.org/amigo/term/GO:0018105
endoplasmic reticulum membrane	Gene Ontology	GO:0005789	4	942	0.445211	0.464292	CYP2S1|ATP10B|TMPRSS4|REEP4	http://amigo.geneontology.org/amigo/term/GO:0005789
heparin binding	Gene Ontology	GO:0008201	1	163	0.447651	0.46642	APP	http://amigo.geneontology.org/amigo/term/GO:0008201
protein folding	Gene Ontology	GO:0006457	1	166	0.453629	0.471387	PPIF	http://amigo.geneontology.org/amigo/term/GO:0006457
positive regulation of protein kinase B signaling	Gene Ontology	GO:0051897	1	166	0.453629	0.471387	MST1R	http://amigo.geneontology.org/amigo/term/GO:0051897
cellular_component	Gene Ontology	GO:0005575	2	433	0.466138	0.483955	TMEM54|ENO4	http://amigo.geneontology.org/amigo/term/GO:0005575
T cell receptor signaling pathway	Gene Ontology	GO:0050852	1	174	0.469257	0.486329	ZC3H12A	http://amigo.geneontology.org/amigo/term/GO:0050852
trans-Golgi network	Gene Ontology	GO:0005802	1	174	0.469257	0.486329	ATP8B1	http://amigo.geneontology.org/amigo/term/GO:0005802
negative regulation of canonical Wnt signaling pathway	Gene Ontology	GO:0090090	1	176	0.473094	0.489871	FERMT1	http://amigo.geneontology.org/amigo/term/GO:0090090
positive regulation of protein phosphorylation	Gene Ontology	GO:0001934	1	178	0.476904	0.493378	APP	http://amigo.geneontology.org/amigo/term/GO:0001934
lamellipodium	Gene Ontology	GO:0030027	1	185	0.490024	0.506055	NME2	http://amigo.geneontology.org/amigo/term/GO:0030027
viral process	Gene Ontology	GO:0016032	2	456	0.493037	0.508268	ZC3H12A|SLC25A5	http://amigo.geneontology.org/amigo/term/GO:0016032
leukocyte migration	Gene Ontology	GO:0050900	1	192	0.502817	0.517892	ATP1B3	http://amigo.geneontology.org/amigo/term/GO:0050900
transcription corepressor activity	Gene Ontology	GO:0003714	1	194	0.506413	0.521137	HR	http://amigo.geneontology.org/amigo/term/GO:0003714
regulation of transcription by RNA polymerase II	Gene Ontology	GO:0006357	3	751	0.512883	0.52733	HR|ETS2|ZNF57	http://amigo.geneontology.org/amigo/term/GO:0006357
cellular protein metabolic process	Gene Ontology	GO:0044267	1	198	0.513528	0.527529	APP	http://amigo.geneontology.org/amigo/term/GO:0044267
defense response to virus	Gene Ontology	GO:0051607	1	200	0.517047	0.530212	ZC3H12A	http://amigo.geneontology.org/amigo/term/GO:0051607
in utero embryonic development	Gene Ontology	GO:0001701	1	202	0.520541	0.533326	GJB3	http://amigo.geneontology.org/amigo/term/GO:0001701
protein kinase activity	Gene Ontology	GO:0004672	1	216	0.544306	0.556211	STK24	http://amigo.geneontology.org/amigo/term/GO:0004672
centrosome	Gene Ontology	GO:0005813	2	506	0.548494	0.560001	CEP55|PLEKHG6	http://amigo.geneontology.org/amigo/term/GO:0005813
axon guidance	Gene Ontology	GO:0007411	1	222	0.55413	0.565261	PVRL1	http://amigo.geneontology.org/amigo/term/GO:0007411
DNA repair	Gene Ontology	GO:0006281	1	224	0.557357	0.568057	FH	http://amigo.geneontology.org/amigo/term/GO:0006281
protein domain specific binding	Gene Ontology	GO:0019904	1	239	0.580835	0.590954	ETS2	http://amigo.geneontology.org/amigo/term/GO:0019904
transcription coactivator activity	Gene Ontology	GO:0003713	1	248	0.594324	0.603627	NME2	http://amigo.geneontology.org/amigo/term/GO:0003713
cellular response to DNA damage stimulus	Gene Ontology	GO:0006974	1	248	0.594324	0.603627	ZC3H12A	http://amigo.geneontology.org/amigo/term/GO:0006974
MAPK cascade	Gene Ontology	GO:0000165	1	261	0.613051	0.622105	MAPK6	http://amigo.geneontology.org/amigo/term/GO:0000165
actin binding	Gene Ontology	GO:0003779	1	266	0.620022	0.628634	EPS8L3	http://amigo.geneontology.org/amigo/term/GO:0003779
early endosome	Gene Ontology	GO:0005769	1	267	0.621402	0.629486	APP	http://amigo.geneontology.org/amigo/term/GO:0005769
intracellular protein transport	Gene Ontology	GO:0006886	1	273	0.629574	0.637212	RAB28	http://amigo.geneontology.org/amigo/term/GO:0006886
response to drug	Gene Ontology	GO:0042493	1	280	0.638887	0.646078	LDHA	http://amigo.geneontology.org/amigo/term/GO:0042493
cytoplasmic vesicle	Gene Ontology	GO:0031410	1	285	0.645396	0.652096	RAB25	http://amigo.geneontology.org/amigo/term/GO:0031410
cell surface receptor signaling pathway	Gene Ontology	GO:0007166	1	286	0.646684	0.652832	ADAP1	http://amigo.geneontology.org/amigo/term/GO:0007166
endoplasmic reticulum lumen	Gene Ontology	GO:0005788	1	296	0.659309	0.663856	APP	http://amigo.geneontology.org/amigo/term/GO:0005788
axon	Gene Ontology	GO:0030424	1	310	0.676236	0.680313	APP	http://amigo.geneontology.org/amigo/term/GO:0030424
glutamatergic synapse	Gene Ontology	GO:0098978	1	354	0.724183	0.727922	ABHD17C	http://amigo.geneontology.org/amigo/term/GO:0098978
neuronal cell body	Gene Ontology	GO:0043025	1	376	0.745441	0.748646	TMPRSS4	http://amigo.geneontology.org/amigo/term/GO:0043025
nuclear speck	Gene Ontology	GO:0016607	1	400	0.76678	0.769415	SDCBP2	http://amigo.geneontology.org/amigo/term/GO:0016607
dendrite	Gene Ontology	GO:0030425	1	420	0.783198	0.784542	PVRL1	http://amigo.geneontology.org/amigo/term/GO:0030425
synapse	Gene Ontology	GO:0045202	1	420	0.783198	0.784542	APP	http://amigo.geneontology.org/amigo/term/GO:0045202
immune response	Gene Ontology	GO:0006955	1	427	0.788669	0.789345	PVRL1	http://amigo.geneontology.org/amigo/term/GO:0006955
chromatin binding	Gene Ontology	GO:0003682	1	443	0.800665	0.800665	ZC3H12A	http://amigo.geneontology.org/amigo/term/GO:0003682
--------------------
Additional file 4. The results of GO enrichment analysis with combined dataset of the top 100 CKMT1A-correlated genes and 50 potential interacting proteins.
